# Supplementary material for: Comprehensive Multi-Omic Evaluation of the Microbiota and Metabolites in the Colons of Diverse Swine Breeds
Source: MDPI journal article supplement (doi:10.3390/ani14081221), 2024-04-18
Supplement: s1 [file s1]

**Supplementary Table S3.** Identified metabolites in plasma between Three-way crossbred pigs and Tibetan pigs based on the untargeted metabolomics study.

| <b>Metabolite name</b>               | <b>VIP</b> | <b>P-value</b> | <b>Mean-Tibetan</b> | <b>Mean-Three-way crossbred</b> |
|--------------------------------------|------------|----------------|---------------------|---------------------------------|
| Quinic acid                          | 1.33935046 | 0.01905904     | 0.00049732          | 0.00022845                      |
| Bicine                               | 1.78928405 | 0.00081585     | 0.00481059          | 0.00201228                      |
| L-histidine                          | 1.46853866 | 0.00524562     | 0.07049220          | 0.03759828                      |
| Homocystine                          | 1.44541666 | 0.03440558     | 0.00027871          | 0.00010160                      |
| L-cystine                            | 1.35266807 | 0.01879328     | 0.00586259          | 0.00309301                      |
| L-asparagine                         | 1.15854946 | 0.00843793     | 0.00762664          | 0.00488002                      |
| Malic acid                           | 1.74660289 | 0.00061887     | 0.08619464          | 0.03730567                      |
| D-tagatose                           | 1.93588309 | 0.00144981     | 0.04175187          | 0.01533489                      |
| D-arabinose                          | 1.79200480 | 0.00004090     | 0.00549308          | 0.00237999                      |
| Maltotriose                          | 1.58704381 | 0.02554653     | 0.02012467          | 0.00632141                      |
| Coniferin                            | 1.57741699 | 0.02088390     | 0.00398960          | 0.00136344                      |
| L-sorbose                            | 1.55800045 | 0.02235854     | 0.02240736          | 0.00971204                      |
| 1,5-anhydroglucitol                  | 1.42058454 | 0.02392643     | 0.03545460          | 0.01796404                      |
| D-fructose                           | 1.23235629 | 0.02640481     | 0.01164541          | 0.00664570                      |
| N-acetylputrescine                   | 1.64592557 | 0.00067227     | 0.02567969          | 0.01241198                      |
| Cholesterone                         | 1.26911482 | 0.00160302     | 0.00090025          | 0.00056944                      |
| Fumaric acid                         | 1.56159323 | 0.00037042     | 0.02889687          | 0.01482558                      |
| Glutaric acid                        | 1.27859150 | 0.00385307     | 0.00095121          | 0.00058398                      |
| Acifluorfen                          | 1.51012147 | 0.01601210     | 0.01063043          | 0.00460075                      |
| Hexadecanedioic acid                 | 1.60195252 | 0.02686166     | 0.00239884          | 0.00086885                      |
| Tetradecanedioic acid                | 1.34274717 | 0.03159409     | 0.00311370          | 0.00157152                      |
| Lactitol                             | 2.11090530 | 0.00060722     | 0.00049127          | 0.00015643                      |
| 5-methoxyindoleacetate               | 1.83675223 | 0.00071689     | 0.04875821          | 0.01941305                      |
| Linoleic acid                        | 1.44735755 | 0.01380474     | 0.01500739          | 0.00790926                      |
| Metanephrene                         | 1.55842614 | 0.00004206     | 0.00303996          | 0.00161591                      |
| Taurine                              | 1.42717422 | 0.00431699     | 0.00683037          | 0.00376021                      |
| O-phosphoethanolamine                | 1.41492840 | 0.01074643     | 0.02461763          | 0.01258863                      |
| 2'-deoxyguanosine                    | 1.69102629 | 0.00447574     | 0.01164028          | 0.00472661                      |
| Hypoxanthine                         | 1.45440987 | 0.00061117     | 0.34001102          | 0.18650466                      |
| Gamma-tocopherol                     | 2.45090806 | 0.00063430     | 0.00170382          | 0.00036512                      |
| Beta-sitosterol                      | 1.49474582 | 0.01082124     | 0.00082741          | 0.00036776                      |
| 4-methyl-5-thiazoleethanol           | 2.58926363 | 0.00877082     | 0.08049209          | 0.01101100                      |
| 3,17,20-trihydroxy-pregn-5-en-11-one | 2.75437082 | 0.00072479     | 0.02022636          | 0.00297648                      |
| Inosine                              | 2.48533559 | 0.00145987     | 0.05383478          | 0.00917989                      |

|                                              |            |            |            |            |
|----------------------------------------------|------------|------------|------------|------------|
| 6-hydroxy-alpha-methylnaphthaleneacetic acid | 1.75815471 | 0.00049659 | 0.37068385 | 0.15890593 |
| 6-hydroxy-2-aminohexanoic acid               | 1.43026060 | 0.04703146 | 0.08383422 | 0.03472409 |
| Alloxanic acid                               | 1.18476553 | 0.00955663 | 0.01375182 | 0.00867045 |
| Palatinitol                                  | 1.02620892 | 0.01515769 | 0.01772263 | 0.01143086 |
| 2-aminoheptanedioic acid                     | 2.50396135 | 0.02850517 | 0.00157164 | 0.01477819 |
| N-carbamoylaspartate                         | 1.76907659 | 0.02920518 | 0.00046267 | 0.00172310 |
| Aminomalonate                                | 1.67714985 | 0.00900832 | 0.05977971 | 0.14923040 |
| Creatinine                                   | 1.36400509 | 0.00619386 | 0.04411832 | 0.08258905 |
| Pipecolic acid                               | 1.29833642 | 0.00358589 | 0.00195650 | 0.00319867 |
| Mesalazine                                   | 2.29966016 | 0.02716268 | 0.00079912 | 0.00559820 |
| Glucosamine                                  | 2.27594497 | 0.00022667 | 0.00004879 | 0.00019458 |
| D-fructose-1-phosphate                       | 1.60136486 | 0.00373796 | 0.00345932 | 0.00777640 |
| Glucose-1-phosphate                          | 1.28043617 | 0.00039241 | 0.00885973 | 0.01396275 |
| Arabinofuranose                              | 1.20660713 | 0.00481612 | 0.00383280 | 0.00598486 |
| Glucose                                      | 1.15265472 | 0.02939493 | 0.38926904 | 0.62623756 |
| 3-phosphoglyceric acid                       | 1.08630755 | 0.03164072 | 0.00563794 | 0.00887462 |
| P-cresol                                     | 2.08893982 | 0.00045214 | 0.00125938 | 0.00395927 |
| Beta-hydroxymyristic acid                    | 2.85267465 | 0.00370812 | 0.00015336 | 0.00182296 |
| Lauric acid                                  | 2.70414137 | 0.01632372 | 0.00028513 | 0.00298727 |
| Dodecanol                                    | 1.40733479 | 0.00008670 | 0.00212087 | 0.00365123 |
| Dehydroascorbic acid                         | 2.30035492 | 0.01561389 | 0.00024649 | 0.00187631 |
| Adenine                                      | 1.40199902 | 0.00412212 | 0.00648310 | 0.01152360 |
| N-acetyl-d-tryptophan                        | 2.26673385 | 0.01275369 | 0.00158827 | 0.00936890 |
| 13beta-ethyl-3-oximinogon-4-en-17-one        | 2.09952307 | 0.02463103 | 0.00099066 | 0.00567703 |
| Lactobionic acid                             | 2.06525006 | 0.00788088 | 0.00050376 | 0.00191631 |
| 4-(dimethylamino)azobenzene                  | 2.00090369 | 0.01275786 | 0.00038203 | 0.00147625 |
| Glycyl tyrosine                              | 1.84519555 | 0.01103718 | 0.00800688 | 0.02754555 |
| Dihydroxymalonic acid                        | 1.83575290 | 0.00297359 | 0.00035339 | 0.00096695 |
| Phosphenodiimidic amide                      | 1.81288506 | 0.00157431 | 0.00374384 | 0.00966586 |
| 2,3-dihydro-8-methoxyfuro(2,3-b)quinoline    | 1.61856063 | 0.01490803 | 0.00128337 | 0.00321977 |
| Piceatannol                                  | 1.56036045 | 0.04843402 | 0.00535176 | 0.01882930 |
| Xanthosine                                   | 1.41708946 | 0.00040427 | 0.00595154 | 0.01056584 |
| L-cysteine-glycine                           | 1.41707709 | 0.00032199 | 0.00044009 | 0.00078030 |
| L-glutamine dehydrated                       | 1.14792517 | 0.00887382 | 0.00610824 | 0.00965092 |
