# Supplementary material for: Comprehensive Multi-Omic Evaluation of the Microbiota and Metabolites in the Colons of Diverse Swine Breeds
Source: MDPI journal article supplement (doi:10.3390/ani14081221), 2024-04-18
Supplement: s1 [file s1]

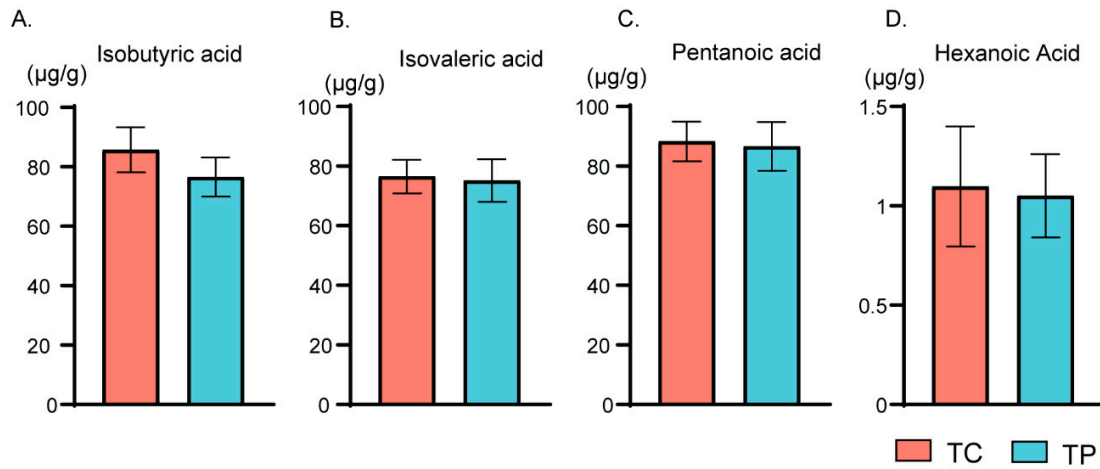

**Supplementary Figure S1. Different concentrations of SCFAs in colon of two breeds pigs.** (A) Isobutyric acid ( $\mu\text{g} / \text{g}$ ), (B) Isovaleric acid ( $\mu\text{g} / \text{g}$ ), (C) Pentanoic acid ( $\mu\text{g} / \text{g}$ ), and (D) Hexanoic Acid ( $\mu\text{g} / \text{g}$ ) in the colonic samples from TC and TP pigs. Data are presented as mean  $\pm$  SD and statistical significance was determined by the Wilcoxon rank-sum test; TC, Duroc  $\times$  landrace  $\times$  yorkshire pigs; TP, Tibetan pig; \*represents significantly difference ( $P \leq 0.05$ ), \*\* $P \leq 0.01$  and \*\*\* $P \leq 0.001$ ;  $n = 6$ .
