# Supplementary material for: Comprehensive Multi-Omic Evaluation of the Microbiota and Metabolites in the Colons of Diverse Swine Breeds
Source: MDPI journal article supplement (doi:10.3390/ani14081221), 2024-04-18
Supplement: s1 [file s1]

Table S1. Primers used for real-time quantitative PCR analysis

| Genes                           | Primers | Primers sequences (5' to 3') |
|---------------------------------|---------|------------------------------|
| <i>FXR</i>                      | F       | TATGAACTCAGGCGAATGCCTGCT     |
|                                 | R       | ATCCAGATGCTCTGTCTCCGCAA      |
| <i>TGR5</i>                     | F       | CCATGCACCCCTGTTGCT           |
|                                 | R       | GGTGCTGTTGGGTGTCATCTT        |
| <i>GPR41</i>                    | F       | GCCCTTGCCCTTCATCTTCT         |
|                                 | R       | CCGGGTCTTGTACCAGAGTG         |
| <i>GPR43</i>                    | F       | CAGAGGCAAAGAGACCGAGG         |
|                                 | R       | TGGTGAAGTCAGAACTCGGC         |
| <i>GPR109</i>                   | F       | CGCGATTTCACAGAACTTCC         |
|                                 | R       | AGCTTCAGACGCCTAGGAAC         |
| <i>SLC5A8</i>                   | F       | GGCACTCGTTTGTGAAGCTG         |
|                                 | R       | ATCCGCCCTCCCAAACATTC         |
| <i>SLC16A1</i>                  | F       | CATCAACTACCGACTTCTG          |
|                                 | R       | TACTGGTCTCCTCCTCTT           |
| <i><math>\beta</math>-actin</i> | F       | TCTGGCACCACACCTTCT           |
|                                 | R       | TGATCTGGGTCATCTTCTCAC        |
