# Supplementary material for: Comprehensive Multi-Omic Evaluation of the Microbiota and Metabolites in the Colons of Diverse Swine Breeds
Source: MDPI journal article supplement (doi:10.3390/ani14081221), 2024-04-18
Supplement: s1 [file s1]

**Supplementary Table S2.** Identified metabolites in colon between Three-way crossbred pigs and Tibetan pigs based on the untargeted metabolomics study.

| Metabolite name                     | VIP        | P-value    | Mean-Tibetan | Mean-Three-way crossbred |
|-------------------------------------|------------|------------|--------------|--------------------------|
| 3-hydroxyphenylacetic acid          | 1.23408367 | 0.00994071 | 0.00493418   | 0.00852868               |
| Tranexamic acid                     | 1.61583781 | 0.04016464 | 0.01241007   | 0.03897431               |
| Ornithine                           | 1.02844892 | 0.01115690 | 0.03341698   | 0.05195989               |
| Maltotriose                         | 2.00903675 | 0.01011463 | 0.01654747   | 0.05888891               |
| D-tagatose                          | 1.74151184 | 0.00370724 | 0.00887009   | 0.02804889               |
| Methyl beta-d-glucopyranoside       | 1.72126727 | 0.01330937 | 0.00756801   | 0.02316986               |
| Phytol                              | 1.76523843 | 0.04501250 | 0.00008520   | 0.00031054               |
| Tryptophol                          | 1.67730697 | 0.00791388 | 0.00027518   | 0.00083882               |
| 2'-deoxyguanosine                   | 1.21867737 | 0.01070947 | 0.00277620   | 0.00475074               |
| 3-fluoro-2-hydroxyprop-2-enoate     | 1.38269551 | 0.00950902 | 0.00015439   | 0.00030115               |
| 2,5-di-tert-butyl-4-(hydroxy)phenol | 1.32199431 | 0.00081788 | 0.00086014   | 0.00048539               |
| Scylo-inositol                      | 2.11798817 | 0.00891241 | 0.04843655   | 0.01185180               |
| 2-hydroxybutanoic acid              | 1.62675891 | 0.01559441 | 0.00287352   | 0.00087185               |
| L-lactic acid                       | 2.08047308 | 0.00022205 | 0.49133808   | 0.14094746               |
| Pyruvic acid                        | 1.57943087 | 0.01183818 | 0.01005537   | 0.00466033               |
| 4-aminobutyric acid                 | 1.23761591 | 0.01660566 | 0.01733129   | 0.00938658               |
| 4-hydroxyproline                    | 1.45797278 | 0.02035116 | 0.00161683   | 0.00065715               |
| Alpha-aminoadipic acid              | 1.67493819 | 0.04067954 | 0.00104401   | 0.00025778               |
| Aminomalonate                       | 1.92286601 | 0.00469622 | 0.00215117   | 0.00060636               |
| DL-dopa                             | 1.04687476 | 0.02013519 | 0.06265073   | 0.04143469               |
| L-aspartic acid                     | 1.38347192 | 0.00415603 | 0.15280830   | 0.07800620               |
| L-cysteine                          | 1.63936771 | 0.00004206 | 0.00232711   | 0.00100919               |
| L-methionine                        | 1.23816849 | 0.01270627 | 0.01631765   | 0.00928174               |
| L-phenylalanine                     | 1.08602672 | 0.02043931 | 0.02690502   | 0.01720934               |
| L-threonine                         | 1.15390470 | 0.00362977 | 0.02364921   | 0.01480341               |
| Sarcosine                           | 1.26195079 | 0.03885478 | 0.02971730   | 0.01597884               |
| Serine                              | 1.18558256 | 0.00518708 | 0.06360789   | 0.03861694               |
| Indoxyl sulfate                     | 1.09954947 | 0.01682029 | 0.01554826   | 0.00891564               |
| Phthalic acid                       | 2.60552252 | 0.00034143 | 0.00062146   | 0.00007404               |
| Syringic acid                       | 1.19430854 | 0.04307017 | 0.00192721   | 0.00111042               |
| Hydroxypropionic acid               | 2.06630460 | 0.00179578 | 0.03168541   | 0.00785386               |

|                                             |            |            |            |            |
|---------------------------------------------|------------|------------|------------|------------|
| Lithocholic acid                            | 1.76272827 | 0.04200230 | 0.03556632 | 0.01283067 |
| Biphenyl                                    | 1.49733797 | 0.00098841 | 0.00523124 | 0.00245740 |
| Digalacturonic acid                         | 1.41789964 | 0.00187148 | 0.00290796 | 0.00151483 |
| Erythronic acid                             | 1.55472451 | 0.00942964 | 0.00031062 | 0.00013535 |
| Gluconic acid                               | 2.23868396 | 0.00937416 | 0.01303349 | 0.00211217 |
| Cholesterol                                 | 1.06351809 | 0.02901781 | 0.00382156 | 0.00229530 |
| 2-hydroxy-2-methylbutanoic acid             | 1.18629601 | 0.01496885 | 0.00566068 | 0.00303304 |
| 2-isopropylmalic acid                       | 1.28940417 | 0.00027835 | 0.00033167 | 0.00018973 |
| 3-methyladipic acid                         | 1.88711224 | 0.00016203 | 0.00488476 | 0.00161858 |
| Citramalic acid                             | 1.58144291 | 0.03165688 | 0.01451394 | 0.00708545 |
| Elaidic acid                                | 2.42877894 | 0.00225380 | 0.28957917 | 0.05635958 |
| Heptadecanoic acid                          | 1.95242704 | 0.03263250 | 0.06776604 | 0.02467997 |
| Hexadecanedioic acid                        | 1.17405291 | 0.01328814 | 0.00115516 | 0.00063649 |
| Nonadecanoic acid                           | 1.35274621 | 0.03195327 | 0.00150317 | 0.00080257 |
| Oleic acid                                  | 2.41596727 | 0.00225418 | 0.28931339 | 0.05667671 |
| Palmitic acid                               | 1.62988583 | 0.00864833 | 1.18020020 | 0.52106756 |
| Pentacosanoic acid                          | 2.27463565 | 0.00451420 | 0.31369632 | 0.09010349 |
| Sebacic acid                                | 2.06925899 | 0.00018969 | 0.25678174 | 0.06427830 |
| Tridecanoic acid                            | 2.37087185 | 0.00043531 | 0.02230124 | 0.00459101 |
| Dehydroascorbic acid                        | 1.18986622 | 0.00703886 | 0.06980261 | 0.04139313 |
| Urocanic acid                               | 1.02735012 | 0.01598114 | 0.00359300 | 0.00239468 |
| Linoleic acid                               | 2.05013983 | 0.00477167 | 0.02652067 | 0.00804687 |
| Taurine                                     | 2.12725613 | 0.01428221 | 0.00080077 | 0.00019007 |
| Orotic acid                                 | 1.22399646 | 0.01939245 | 0.00202152 | 0.00112316 |
| Kynurenic acid                              | 1.40697746 | 0.00273551 | 0.00361348 | 0.00173345 |
| L-2-hydroxyglutaric acid                    | 1.65738290 | 0.03861829 | 0.01436165 | 0.00592735 |
| 2-ketobutyric acid                          | 1.36710228 | 0.02787210 | 0.00213142 | 0.00113347 |
| Isocitric acid                              | 1.17127020 | 0.00934335 | 0.06874154 | 0.04120830 |
| 2-hydroxy-2-phenylpropanoic acid            | 1.17763793 | 0.02050273 | 0.00048541 | 0.00026452 |
| 3-methylene-2-phenyl-1-hydroxy-cyclopentene | 1.83588681 | 0.00550959 | 0.00053459 | 0.00015065 |
| 4-hydroxyanthraquinone-2-carboxylic acid    | 1.45106049 | 0.03203373 | 0.02426230 | 0.01303426 |
| 6-deoxyglucitol                             | 1.12311052 | 0.00067842 | 0.00062894 | 0.00040828 |
| Alloxanoic acid                             | 1.26175283 | 0.01846038 | 0.00019561 | 0.00009874 |
| Digitoxose                                  | 1.11556611 | 0.00278112 | 0.01659349 | 0.01078277 |
| Dihydroxymalonic acid                       | 1.51214209 | 0.00085561 | 0.00198514 | 0.00086095 |

|                                          |            |            |            |            |
|------------------------------------------|------------|------------|------------|------------|
| Harmol                                   | 1.37879717 | 0.00520894 | 0.00018092 | 0.00009696 |
| N-(2-hydroxyethyl)<br>tetradecan-1-amine | 1.29189540 | 0.00121909 | 0.00462236 | 0.00262804 |
| Phosphenodiimidic<br>amide               | 1.50620834 | 0.00020567 | 0.00096904 | 0.00047872 |
