# Supplementary material for: Comprehensive Multi-Omic Evaluation of the Microbiota and Metabolites in the Colons of Diverse Swine Breeds
Source: Animals (Basel). 2024 Apr 18;14(8):1221. doi: 10.3390/ani14081221 (PMC11047667; doi:10.3390/ani14081221)
Supplement: Supplementary file 1 [file animals-14-01221-s001.zip]

Archive with 5 entries (5 files):
- animals-2933953-supplementary.xlsx
- Supplementary Figure S1.pdf
- Supplementary Table S1.pdf
- Supplementary Table S2.pdf
- Supplementary Table S3.pdf
