# Supplementary material for: Comprehensive Multi-Omic Evaluation of the Microbiota and Metabolites in the Colons of Diverse Swine Breeds
Source: Animals (Basel). 2024 Apr 18;14(8):1221. doi: 10.3390/ani14081221 (PMC11047667; doi:10.3390/ani14081221)
Supplement: Supplementary file 1 [file animals-14-01221-s001.zip › animals-2933953-supplementary.xlsx]

## Sheet: Figure 1
Groups	Acetic acid	Propionic acid	Isobutyric acid	Butyric acid	Isovaleric acid	Pentanoic acid	Caproic acid	Total SCFA
Duroc×landrace×yorkshire pig 1	1655286	508552	90888	287842	79025	91273.2	326.618	2.71319e+06
Duroc×landrace×yorkshire pig 2	1938349	557993	120263	249546	99923.1	117190	852.486	3.08412e+06
Duroc×landrace×yorkshire pig 3	1869215	541593	83145.9	315069	67429.5	76028.3	890.58	2.95337e+06
Duroc×landrace×yorkshire pig 4	2566351	442235	78028.1	331359	59348.5	70359.3	491.354	3.54817e+06
Duroc×landrace×yorkshire pig 5	2460371	591717	70183.4	468783	73699.6	84839.8	1987.12	3.75158e+06
Duroc×landrace×yorkshire pig 6	2293248	591047	71625.9	420261	79746.9	89952	2034.44	3.54791e+06
Tibetan pig 1	1320474	369228	69317.3	256399	66628.5	78192.4	903.171	2.16114e+06
Tibetan pig 2	1139314	373451	67296	199508	69090.3	79857.9	553.539	1.92907e+06
Tibetan pig 3	1245707	374150	59770.2	225668	60081.1	70539.3	635.686	2.03655e+06
Tibetan pig 4	1691729	392727	90650.2	303554	88620.5	99840.9	1906.24	2.66903e+06
Tibetan pig 5	1891039	422004	102004	391008	104053	120972	1406.72	3.03249e+06
Tibetan pig 6	1319761	382818	70307.4	212063	62373.7	70414.8	899.951	2.11864e+06
D×l×y pig 1
D×l×y pig 2
D×l×y pig 3
D×l×y pig 4
D×l×y pig 5
D×l×y pig 6

## Sheet: Figure 2
Groups	FXR5	TGR5	GPR41	GPR43	GPR109	SLC5A8	SLC16A1
Duroc×landrace×yorkshire pig 1	1.00148	0.748024	1.18183	0.991272	0.924426	1.41918	0.841152
Duroc×landrace×yorkshire pig 2	0.905186	1.03605	1.27311	0.964921	1.01093	1.50472	1.38994
Duroc×landrace×yorkshire pig 3	1.08527	0.871187	0.785935	0.838067	0.62079	0.813611	1.23228
Duroc×landrace×yorkshire pig 4	1.17698	1.17517	0.912047	1.09942	2.53017	0.842242	1.25657
Duroc×landrace×yorkshire pig 5	0.889771	0.9847	0.693083	1.26127	0.654756	0.811983	0.88829
Duroc×landrace×yorkshire pig 6	0.970589	0.955836	1.15399	1.24784	1.04048	0.841603	0.621844
Tibetan pig 1	2.1547	1.69134	0.33301	0.962934	1.15672	1.26239	0.67271
Tibetan pig 2	2.49756	0.842966	0.318133	0.472307	1.35324	1.35433	0.881156
Tibetan pig 3	2.51755	1.24334	0.551393	0.668514	0.849461	1.49374	0.628789
Tibetan pig 4	3.03724	1.52354	0.635555	0.75311	1.46196	1.27001	1.06155
Tibetan pig 5	3.20337	1.79959	0.633426	0.794298	0.879296	1.15669	1.25273
Tibetan pig 6	3.54606	2.04002	0.563429	0.730002	1.25513	1.31042	2.30235

## Sheet: Metabolomics-plasma
ID	m/z	Retention time (min)	Ion mode	Metabolites	Compound ID	Super Class	Class	Sub Class	level	kegg	Score	Fragmentation Score	Adducts	Formula	Mass Error (ppm)	VIP	P-value	adj.P-value	log2(FC)	FC	average(Z)	average(B)	ZX19	ZX20	ZX21	ZX22	ZX23	ZX24	BX13	BX14	BX15	BX16	BX17	BX18
13.32_785.5932n	808.582	13.3194	pos	PC(18:1(17Z)/18:1(17Z))	LMGP01010858	Lipids and lipid-like molecules	Glycerophospholipids	Glycerophosphocholines			47.6	48.1	M+Na, M+K	C44H84NO8P	-0.291352	41.5126	0.00768168	0.151363	0.693431	1.61713	3.54035e+07	2.18929e+07	2.9468e+07	2.68457e+07	3.33633e+07	4.06902e+07	4.14202e+07	4.06338e+07	2.1696e+07	7.22249e+06	2.50854e+07	2.90293e+07	2.26626e+07	2.56615e+07
13.45_383.3394n	384.347	13.4487	pos	N-stearoyl valine	75504	Lipids and lipid-like molecules	Fatty Acyls	Fatty amides			51.6	64.2	M+H, M+K, M+Na	C23H45NO3	-1.46784	24.0112	0.00267513	0.091846	-0.324575	0.798533	1.59945e+07	2.00298e+07	1.81947e+07	1.62091e+07	1.66648e+07	1.5471e+07	1.50217e+07	1.44057e+07	2.31091e+07	2.16004e+07	1.89598e+07	2.05235e+07	1.75479e+07	1.84384e+07
12.70_264.2449n	282.279	12.698	pos	(±)-(Z)-2-(5-Tetradecenyl)cyclobutanone	HMDB0037543	Organic oxygen compounds	Organooxygen compounds	Carbonyl compounds			46.9	38.3	M+H, M+NH4, M+H-H2O	C18H32O	-1.4738	16.8395	0.00936444	0.165349	-1.17905	0.441644	2.11558e+06	4.79025e+06	1.54036e+06	2.55965e+06	1.88673e+06	1.94932e+06	2.74701e+06	2.01044e+06	4.21493e+06	5.90783e+06	2.33481e+06	3.11445e+06	5.3643e+06	7.80519e+06
11.52_880.6064m/z	880.606	11.5188	neg	PC(22:5(4Z,7Z,10Z,13Z,16Z)/18:0)	HMDB0008661	Lipids and lipid-like molecules	Glycerophospholipids	Glycerophosphocholines	**	C00157	45.2	55.7	M+FA-H	C48H86NO8P	-1.14504	13.9966	0.00390055	0.110253	-0.459699	0.727138	3.73908e+06	5.14218e+06	4.23493e+06	4.24609e+06	3.61834e+06	3.74781e+06	3.04636e+06	3.54095e+06	5.91787e+06	5.41576e+06	5.30674e+06	5.67619e+06	3.68147e+06	4.85508e+06
7.62_449.3139n	432.311	7.61787	pos	Glycoursodeoxycholic acid	HMDB0000708	Lipids and lipid-like molecules	Steroids and steroid derivatives	Bile acids, alcohols and derivatives	***		57.9	93.2	M+H-H2O, M+Na, M+H, M+NH4	C26H43NO5	-0.488992	12.3989	0.000122751	0.0260501	1.57423	2.97776	1.52375e+06	511710	1.21243e+06	1.27906e+06	1.40647e+06	1.73108e+06	2.01241e+06	1.50104e+06	448522	633107	214239	846880	180012	747502
0.71_117.0789n	118.086	0.709233	pos	L-Valine	35	Organic acids and derivatives	Carboxylic acids and derivatives	Amino acids, peptides, and analogues	**	C00183	56	85.8	M+Na, M+K, M+H	C5H11NO2	-0.890879	9.66294	0.00203034	0.0811899	-0.560566	0.678036	1.43651e+06	2.11863e+06	1.65572e+06	1.81517e+06	1.45872e+06	1.27066e+06	1.25675e+06	1.16202e+06	1.96624e+06	2.28058e+06	1.84443e+06	2.58778e+06	1.76744e+06	2.2653e+06
10.71_540.3304m/z	540.33	10.7123	neg	LysoPC(16:0)	HMDB0010382	Lipids and lipid-like molecules	Glycerophospholipids	Glycerophosphocholines	**	C04230	58.2	93.3	M+FA-H	C24H50NO7P	-0.632866	9.35839	0.0397812	0.288769	-0.191583	0.875644	6.09664e+06	6.96247e+06	6.70763e+06	6.58078e+06	6.32297e+06	5.59951e+06	6.03856e+06	5.33042e+06	6.28693e+06	7.99952e+06	6.09685e+06	6.99435e+06	7.46228e+06	6.93487e+06
7.62_414.3000m/z	414.3	7.61787	pos	N-gamma-linolenoyl dopamine	LMFA08020273	Lipids and lipid-like molecules	Fatty Acyls	Fatty amides			40.1	6.09	M+H	C26H39NO3	-0.74348	7.95111	0.000118735	0.0260501	1.58173	2.99328	623839	208413	493276	526773	573430	702768	829157	617631	185479	252091	87519.2	343848	75463.9	306079
1.39_132.1019m/z	132.102	1.39363	pos	L-Isoleucine	23	Organic acids and derivatives	Carboxylic acids and derivatives	Amino acids, peptides, and analogues	**	C00407	51	62	M+H	C6H13NO2	-0.351809	7.29262	0.047192	0.312986	0.258904	1.19657	3.09768e+06	2.5888e+06	3.49213e+06	3.12772e+06	2.61865e+06	3.0381e+06	2.96309e+06	3.3464e+06	1.66746e+06	2.83712e+06	2.70661e+06	2.73515e+06	2.69539e+06	2.89109e+06
0.78_136.0385n	137.046	0.784133	pos	Hypoxanthine	HMDB0000157	Organoheterocyclic compounds	Imidazopyrimidines	Purines and purine derivatives	***	C00262	43.7	24.5	M+H, M+K, M+Na	C5H4N4O	-0.440429	6.64258	0.00116664	0.0637013	0.932837	1.90903	679433	355906	872844	845611	665507	525618	592375	574646	231048	450608	447117	247229	416607	342827
11.40_471.3464m/z	471.346	11.4006	pos	Glycyrrhetinic acid	LMPR0106150014	Lipids and lipid-like molecules	Prenol lipids	Triterpenoids	*	C02283	54.2	76.2	M+H	C30H46O4	-0.97008	6.3324	0.00960698	0.166941	7.12258	139.351	297203	2132.76	168615	365105	180925	136664	202494	729413	1733.7	2679.66	2100.23	2231.24	1752.51	2299.24
1.04_136.0385n	137.046	1.0359	pos	Allopurinol	HMDB0014581	Organoheterocyclic compounds	Pyrazolopyrimidines	Pyrazolo[3,4-d]pyrimidines			40	5.7	M+H, M+K, M+Na	C5H4N4O	-0.419475	5.83741	0.000261478	0.0340052	0.939977	1.9185	484594	252590	603411	503009	434687	531025	378553	456879	159294	314434	312368	187844	296208	245393
0.89_187.0411m/z	187.041	0.894467	neg	6-(hydroxymethyl)-7-methoxy-2H-chromen-2-one	HMDB0136784	Phenylpropanoids and polyketides	Coumarins and derivatives	Unclassified			40.6	14.4	M-H2O-H	C11H10O4	4.81776	5.77524	0.0136323	0.19088	0.289658	1.22235	1.55911e+06	1.2755e+06	1.80372e+06	1.29343e+06	1.58008e+06	1.69211e+06	1.38436e+06	1.60095e+06	1.02905e+06	1.43467e+06	1.27841e+06	1.32019e+06	1.27709e+06	1.3136e+06
11.94_262.2294n	280.263	11.9428	pos	6,10,14-Trimethyl-5,9,13-pentadecatrien-2-one	89972	Lipids and lipid-like molecules	Prenol lipids	Diterpenoids	*		47.9	43.2	M+H, M+NH4, M+H-H2O	C18H30O	-1.18921	5.60123	0.00653589	0.141275	-1.13851	0.454228	233828	514781	149972	260272	232999	216137	319529	224060	486571	653272	256706	369766	526330	796044
1.05_201.0373m/z	201.037	1.04623	neg	2-(2-Thienylmethylene)-1,6-dioxaspiro[4.4]non-3-ene	HMDB0034857	Organic oxygen compounds	Organooxygen compounds	Ethers			37.5	1.83	M-H2O-H	C12H12O2S	-3.18642	5.49672	0.00638792	0.139586	0.242282	1.18286	1.60182e+06	1.35419e+06	1.78639e+06	1.48972e+06	1.65014e+06	1.69998e+06	1.51612e+06	1.46859e+06	1.17561e+06	1.50374e+06	1.38703e+06	1.25236e+06	1.3738e+06	1.43261e+06
13.32_794.5661m/z	794.566	13.3194	pos	PE(22:2(13Z,16Z)/18:3(9Z,12Z,15Z))	HMDB0009557	Lipids and lipid-like molecules	Glycerophospholipids	Glycerophosphoethanolamines	**	C00350	39.3	32.3	M+H	C45H80NO8P	-4.24226	5.24569	0.0349565	0.27488	-0.235496	0.849393	1.30623e+06	1.53784e+06	1.16012e+06	1.23149e+06	1.17947e+06	1.50174e+06	1.40802e+06	1.35653e+06	1.62002e+06	1.81555e+06	1.65223e+06	1.38926e+06	1.42249e+06	1.32749e+06
6.47_498.2893m/z	498.289	6.4711	neg	Taurochenodesoxycholic acid	HMDB0000951	Lipids and lipid-like molecules	Steroids and steroid derivatives	Bile acids, alcohols and derivatives	**	C05465	39.4	5.06	M-H	C26H45NO6S	-0.41052	5.10796	0.0092469	0.164126	1.18304	2.27055	400693	176474	487298	154596	300175	538296	522440	401351	144244	226176	112543	317016	96415.2	162448
11.31_577.5184m/z	577.518	11.3142	pos	DG(16:0/18:1(11Z)/0:0)	LMGL02010307	Lipids and lipid-like molecules	Glycerolipids	Diradylglycerols	**	C00165	40	11.1	M+H-H2O	C37H70O5	-1.02586	4.95773	0.00248827	0.0887942	-0.580923	0.668536	388140	580583	356956	303912	318430	360548	499416	489580	468769	622047	525388	581803	705288	580201
12.44_256.2631m/z	256.263	12.4403	pos	Palmitamide	LMFA08010009	Lipids and lipid-like molecules	Fatty Acyls	Fatty amides	*		41.6	12.8	M+H	C16H33NO	-1.6866	4.90427	0.00790059	0.153535	-0.517339	0.698659	489554	700705	445392	523634	466728	527092	494713	479764	647795	707150	688162	539092	632716	989316
4.61_187.0062m/z	187.006	4.60603	neg	p-Toluenesulfonic acid	HMDB0059933	Benzenoids	Benzene and substituted derivatives	Benzenesulfonic acids and derivatives	***	C06677	50.7	64	M-H	C7H8O4S	-4.50312	4.69963	0.000291244	0.0343239	-1.78857	0.289459	60787.5	210004	38794.7	42849.3	37170.1	22595.8	66927.7	156388	191935	222412	262143	178406	259110	146015
0.73_235.1649m/z	235.165	0.727467	pos	(±)-Propionylcarnitine	85176	Unclassified	Unclassified	Unclassified			39.1	0	M+NH4	C10H19NO4	-1.47896	4.69428	0.00111657	0.0627309	-2.643	0.160095	29613.9	184977	44120	8991.28	38401.3	33340.2	28668.8	24162	305568	219446	96927	235827	96484.9	155613
0.71_161.1050n	162.112	0.709233	pos	L-Carnitine	34532	Organic nitrogen compounds	Organonitrogen compounds	Quaternary ammonium salts	**	C00318	55.9	89.2	M+H, M+Na	C7H15NO3	-1.12092	4.44231	0.0285828	0.250386	0.714779	1.64123	531099	323598	702229	517948	562838	617517	577644	208416	220752	207089	445797	306035	442450	319462
12.08_857.6732m/z	857.673	12.08	neg	SM(d18:2/24:0)	83781	Lipids and lipid-like molecules	Sphingolipids	Phosphosphingolipids			37.8	0	M+FA-H	C47H93N2O6P	-2.60622	4.33694	0.039089	0.287428	-0.3475	0.785945	658528	837881	852899	824740	757278	429535	548725	537992	939607	866773	782733	813070	835951	789151
13.60_284.2944m/z	284.294	13.5977	pos	Enigmol	LMSP01080058	Lipids and lipid-like molecules	Sphingolipids	Sphingoid bases			39.6	4.01	M+H-H2O	C18H39NO2	-1.20539	4.0268	0.0107351	0.172523	-0.349372	0.784926	493849	629167	501196	512022	496525	504878	455569	492904	590210	623278	736903	492426	567108	765075
10.71_1035.6619m/z	1035.66	10.7123	neg	GM4(d18:1/16:0)	LMSP0601AA01	Lipids and lipid-like molecules	Sphingolipids	Acidic glycosphingolipids			43.9	26.5	M+FA-H	C51H94N2O16	3.39703	3.91408	0.0428754	0.300491	-0.332159	0.794347	584352	735638	695176	717530	546094	480982	594047	472280	580484	910567	615511	785148	766287	755829
1.27_268.0806n	291.07	1.2684	pos	Inosine	84	Nucleosides, nucleotides, and analogues	Purine nucleosides	Unclassified	**	C00294	54.2	74.7	M+Na, M+K, M+H	C10H12N4O5	-0.754414	3.89352	0.00239866	0.0871982	4.00496	16.0551	121051	7539.72	157531	200055	122113	169571	31838.7	45199.1	2096.33	18027.9	7000.54	3278.37	7490.99	7344.23
10.71_608.3178m/z	608.318	10.7123	neg	PHHdiA-PE	LMGP20020017	Lipids and lipid-like molecules	Glycerophospholipids	Oxidized glycerophospholipids			38.4	0.3	M-H	C28H52NO11P	-4.4617	3.76788	0.00349426	0.105588	-0.24176	0.845713	604483	714761	624820	650991	650052	585024	577764	538247	671986	763668	632097	760700	757620	702496
13.11_346.3078n	364.342	13.1081	pos	1-O-(2R-methoxy-hexadecyl)-sn-glycerol	LMGL01020039	Lipids and lipid-like molecules	Glycerolipids	Monoradylglycerols			39.2	2.89	M+NH4, M+Na, M+H	C20H42O4	-1.61265	3.71091	0.00843449	0.15861	-0.130478	0.913529	1.1187e+06	1.22459e+06	1.22681e+06	1.13023e+06	1.12648e+06	1.10941e+06	1.07383e+06	1.04547e+06	1.28968e+06	1.27963e+06	1.19323e+06	1.19689e+06	1.16915e+06	1.21899e+06
9.16_293.1758m/z	293.176	9.16182	neg	7,10-hexadecadiynoic acid	LMFA01030492	Lipids and lipid-like molecules	Fatty Acyls	Fatty Acids and Conjugates			52.3	64.1	M+FA-H	C16H24O2	-0.172623	3.63615	0.00184935	0.0773655	-0.441589	0.736323	292016	396587	234818	329717	348621	274610	289212	275121	438724	379356	334749	390175	377704	458816
11.16_788.5786m/z	788.579	11.1642	neg	PC(16:1(9Z)/P-18:0)	HMDB0008028	Lipids and lipid-like molecules	Glycerophospholipids	Glycerophosphocholines	**	C00157	36.8	0	M+FA-H	C42H82NO7P	-3.30954	3.52393	0.0326128	0.266459	0.408993	1.32776	459011	345704	385504	486238	502183	542237	377746	460158	358986	394818	401041	164332	394475	360570
1.14_164.0473n	182.081	1.14185	pos	4-Hydroxycinnamic acid	HMDB0002035	Phenylpropanoids and polyketides	Cinnamic acids and derivatives	Hydroxycinnamic acids and derivatives	***	C00811	47.4	45.5	M+H, M+NH4, M+H-H2O	C9H8O3	-0.332235	3.37528	0.0469257	0.311741	0.339105	1.26497	535311	423180	651794	656787	403694	582735	440769	476084	341047	410851	426295	477633	405610	477643
10.90_480.3081m/z	480.308	10.8968	pos	PE(18:1(9Z)/0:0)	40778	Lipids and lipid-like molecules	Glycerophospholipids	Glycerophosphoethanolamines			57	88.1	M+H	C23H46NO7P	-0.851171	3.3673	0.001274	0.0676615	0.521858	1.4358	262372	182735	297629	253556	297372	223861	232856	268955	139708	183747	211254	150635	202747	208321
10.41_501.2849n	502.292	10.4094	pos	LysoPE(20:4(8Z,11Z,14Z,17Z)/0:0)	62302	Lipids and lipid-like molecules	Glycerophospholipids	Glycerophosphoethanolamines	*		52.9	66.9	M+H, M+Na	C25H44NO7P	-1.20516	3.34923	0.028694	0.250468	-0.249035	0.841459	599568	712534	659038	637266	557258	570122	570656	603068	619399	755746	641435	786478	617580	854565
0.69_257.1028n	296.066	0.688833	pos	Glycerophosphocholine	HMDB0000086	Lipids and lipid-like molecules	Glycerophospholipids	Glycerophosphocholines	***	C00670	55.1	79.2	M+Na, M+K	C8H20NO6P	-0.259901	3.32057	0.0267108	0.244556	1.41263	2.66222	180392	67760	248708	224626	75470.7	145628	323479	64440.9	72729	58774.6	43645.1	118792	46444.5	66174.8
9.79_379.2484n	380.256	9.78662	pos	Sphingosine-1-phosphate	3891	Lipids and lipid-like molecules	Sphingolipids	Phosphosphingolipids	**	C06124	56.6	88.6	M+H, M+Na, M+H-H2O	C18H38NO5P	-1.05723	3.10046	0.0233715	0.233868	0.940551	1.91926	196067	102157	340724	147920	172631	238599	165113	111413	69833.1	132249	87127.8	132391	87688.3	103655
9.79_378.2414m/z	378.241	9.7884	neg	Phytosphingosine-1-P	HMDB0012280	Lipids and lipid-like molecules	Sphingolipids	Phosphosphingolipids	*		39.5	1.58	M-H2O-H	C18H40NO6P	-0.247691	3.01763	0.0302662	0.257248	0.858519	1.81318	205733	113466	366958	153620	173181	223989	189095	127556	78396.8	152017	94983.2	136817	106553	112026
8.18_210.1619n	228.196	8.17662	pos	9-tridecynoic acid	LMFA01030602	Lipids and lipid-like molecules	Fatty Acyls	Fatty Acids and Conjugates			48.9	50	M+H-H2O, M+H, M+NH4	C13H22O2	-0.176646	3.01192	0.00514531	0.126709	-0.147757	0.902653	602515	667494	599070	597567	640708	620870	604842	552034	696631	650281	709803	616072	667092	665086
7.59_450.3129m/z	450.313	7.59025	neg	Teleocidin B-1	66297	Unclassified	Unclassified	Unclassified			36.2	0	M-H	C28H41N3O2	0.684227	2.8977	0.000247622	0.0340052	1.34285	2.53652	93471.3	36850.2	98530.7	66696.4	90073.7	116369	101897	87261.6	34520.6	50994.2	15113.2	56788	14228.9	49456.2
0.80_268.0807n	307.044	0.803933	pos	Arabinosylhypoxanthine	HMDB0003040	Nucleosides, nucleotides, and analogues	Purine nucleosides	Unclassified			43.9	24.8	M+Na, M+K	C10H12N4O5	-0.196705	2.8914	0.00175482	0.0757401	3.59498	12.0836	67725	5604.71	95129.2	60038.2	108554	89593.6	21215.6	31819.1	1547.7	12675.7	5202.18	2800.04	5843.46	5559.22
9.24_616.1763m/z	616.176	9.23902	pos	Pelargonidin 3-sophoroside	HMDB0033679	Phenylpropanoids and polyketides	Flavonoids	Flavonoid glycosides		C16305	51.1	62.3	M+Na	C28H33O14+	0.129369	2.8384	0.00286365	0.0956613	-1.23995	0.423388	43283.9	102232	41525.1	21740.2	34221.7	44273.3	31998.6	85944.5	116406	100291	105919	146337	84862.8	59578.7
7.11_448.3068m/z	448.307	7.11367	neg	N-Palmitoyl phenylalanine	HMDB0062339	Organic acids and derivatives	Carboxylic acids and derivatives	Amino acids, peptides, and analogues			47.1	39.6	M+FA-H	C25H41NO3	-0.107714	2.82235	0.00893891	0.163132	2.30686	4.94807	85654	17310.6	47180.6	57205.2	52211.9	100929	177121	79276.2	7929.65	34604.4	2387.61	39420.5	1836.85	17684.7
12.55_355.3081n	378.297	12.5459	pos	Pristanoylglycine	HMDB0013303	Lipids and lipid-like molecules	Prenol lipids	Diterpenoids	*		44.4	30.2	M+H, M+Na	C21H41NO3	-1.66452	2.76564	0.00143752	0.0705786	-0.40094	0.757364	161026	212613	176290	170267	163908	165726	147573	142389	235330	250888	202029	212071	188051	187310
6.12_261.0556n	262.063	6.12385	pos	Desmethylflumazenil acid (Ro 15-6877)	2729	Unclassified	Unclassified	Unclassified			43.7	23.2	M+H-H2O, M+H	C12H8FN3O3	2.32731	2.73694	0.00150058	0.0718375	27.8098	2.35276e+08	53828.2	0.000228787	20736	62431.3	12864	88324.2	77368.8	61244.8	0.000228787	0.000228787	0.000228787	0.000228787	0.000228787	0.000228787
9.37_360.2662n	343.263	9.36525	pos	17beta-Hydroxy-6beta-methyl-5alpha-androstan-3-one propionate	70804	Unclassified	Unclassified	Unclassified			39.2	0.166	M+H-H2O, M+H	C23H36O3	-0.60126	2.6886	0.00376975	0.108208	-4.46067	0.0454156	2700.88	59470.3	807.06	2606.89	1916.99	1158.98	8104.04	1611.3	34277.7	1322.31	92075.4	52301.2	91824.7	85020.3
13.51_247.1663m/z	247.166	13.513	pos	S-cucujolide III	LMFA07040046	Lipids and lipid-like molecules	Fatty Acyls	Fatty esters			43.8	26.1	M+Na	C14H24O2	-2.66759	2.44523	0.0200926	0.219946	-0.0847179	0.942969	836939	887557	878413	831819	858008	845307	813490	794597	949892	892995	862727	879106	858441	882185
11.41_469.3321m/z	469.332	11.4146	neg	alpha-tocotrienol	LMPR02020054	Lipids and lipid-like molecules	Prenol lipids	Quinone and hydroquinone lipids	**	C14153	40.3	5.33	M+FA-H	C29H44O2	-0.644207	2.39112	0.00296846	0.0965532	27.36	1.72261e+08	39411.2	0.000228787	33102.4	43943.6	22995	19057.7	30585.8	86782.5	0.000228787	0.000228787	0.000228787	0.000228787	0.000228787	0.000228787
9.88_549.2892m/z	549.289	9.88027	neg	Crenatine A	68081	Unclassified	Unclassified	Unclassified			37.4	0	M-H2O-H	C34H40N4O4	3.65028	2.38053	0.00908719	0.163573	27.4963	1.89332e+08	43316.8	0.000228787	16096.4	100936	36900.5	15683.9	28747.6	61536	0.000228787	0.000228787	0.000228787	0.000228787	0.000228787	0.000228787
10.71_1103.6487m/z	1103.65	10.7123	neg	Lithocholic acid 3-O-glucuronide	LMST05010066	Lipids and lipid-like molecules	Steroids and steroid derivatives	Steroidal glycosides	**	C03033	45.3	50.2	2M-H	C30H48O9	-3.35283	2.36693	0.00273595	0.0927631	-0.489986	0.712032	102526	143991	110389	127129	96866.1	85082.6	106532	89159.2	120922	171349	124902	160848	152411	133513
9.61_301.2979n	302.305	9.6079	pos	Safingol ( L-threo-sphinganine)	LMSP01080055	Lipids and lipid-like molecules	Sphingolipids	Sphingoid bases			47.6	42.1	M+H, M+Na	C18H39NO2	-0.708843	2.29889	0.0410898	0.29403	0.721798	1.64924	141536	85818.9	252842	138775	109181	143707	111194	93515.2	91828.9	74149.7	91474.6	91941.3	86029.2	79489.5
9.24_472.3187n	471.311	9.24023	neg	(17alpha,23S)-Epoxy-28,29-dihydroxy-27-norlanost-8-ene-3,24-dione	HMDB0035624	Lipids and lipid-like molecules	Prenol lipids	Triterpenoids	*		40.9	7.21	M-H, M+FA-H	C29H44O5	-0.460199	2.2542	0.00378157	0.10824	3.85746	14.4948	41673.1	2875.04	34279.1	71495.6	30195.4	75385	19206.4	19476.9	2793.77	3331.41	2131.92	3229.21	2718.22	3045.72
4.10_890.9193m/z	890.919	4.10155	neg	Luteolin 7,3'-disulfate	LMPK12110737	Lipids and lipid-like molecules	Polyketides	Flavonoids			37.7	5.82	2M-H	C15H10O12S2	4.31831	2.25149	0.0103756	0.171922	-3.19065	0.109527	5604.73	51172.3	0.000228787	0.000228787	373.709	0.000228787	0.000228787	33254.7	1630.84	48375.9	72412.3	28492.4	62308.7	93813.8
0.73_227.1248m/z	227.125	0.727467	pos	(1S,2S,4R,8R)-p-Menthane-1,2,8,9-tetrol	HMDB0039974	Lipids and lipid-like molecules	Prenol lipids	Monoterpenoids	*		45.9	37.5	M+Na	C10H20O4	-2.89802	2.23123	0.00233511	0.0867711	0.804857	1.74697	82466	47205.1	57533.9	104912	75410.3	87766.9	82737.3	86436.1	24374.8	38289.9	51524.4	60814.2	45216.1	63011.4
14.37_411.3708n	412.378	14.3683	pos	Tricosanoylglycine	HMDB0013314	Organic acids and derivatives	Carboxylic acids and derivatives	Amino acids, peptides, and analogues			50.2	56.3	M+H, M+Na	C25H49NO3	-0.988765	2.21005	0.0305819	0.258738	-0.302704	0.810731	180731	222923	229274	173746	198016	166276	158577	158496	260698	196361	219830	258412	210717	191520
10.89_478.2936m/z	478.294	10.8878	neg	LysoPE(18:1(9Z)/0:0)	HMDB0011506	Lipids and lipid-like molecules	Glycerophospholipids	Glycerophosphoethanolamines	*		42.6	17.5	M-H	C23H46NO7P	-0.676274	2.18664	0.0147256	0.196669	0.324697	1.2524	208726	166661	244899	187424	236618	178292	198400	206724	139550	164053	184784	158791	201222	151564
7.66_242.1513n	241.144	7.65988	neg	2-Carboxy-4-dodecanolide	HMDB0030987	Organoheterocyclic compounds	Lactones	Gamma butyrolactones	*		46.2	35.8	M-H2O-H, M-H	C13H22O4	-2.22498	2.16767	0.0459801	0.309579	1.19131	2.2836	82207.9	35999.3	132452	129816	115329	27967.9	36621.9	51061	48429.7	22171.5	31480.9	37487.2	31389.6	45036.8
6.90_462.2861m/z	462.286	6.90325	neg	Latanoprost ethyl amide	45716	Unclassified	Unclassified	Unclassified			39.7	0	M+FA-H	C25H39NO4	0.0495642	2.13512	0.0196344	0.217562	1.36575	2.5771	58076.7	22535.7	25731.1	92920.5	37462.4	40467.6	64097.7	87780.6	11041	29510	13416.3	15427.6	17432.2	48386.7
6.47_566.2767m/z	566.277	6.4711	neg	Dihydrodeoxystreptomycin	2507	Unclassified	Unclassified	Unclassified			38.3	0	M-H	C21H41N7O11	-4.31254	2.11158	0.00969983	0.167444	1.22436	2.33652	67382.3	28838.7	83784.5	24845.1	49994.6	89702.3	88075.2	67892.1	23877.5	38701.3	17027.7	53510.7	14854.2	25060.7
1.26_267.0733m/z	267.073	1.26495	neg	Allopurinol riboside	HMDB0000481	Nucleosides, nucleotides, and analogues	Pyrazolo[3,4-d]pyrimidine glycosides	Unclassified			41	8.62	M-H	C10H12N4O5	-0.618623	2.08604	0.00109886	0.0627309	2.79634	6.94674	37255.4	5363.01	52754.8	28904.7	52265.5	52263.5	19342.8	18001.3	2659.22	9833.7	5456.03	2312.97	6440.23	5475.88
10.62_299.2226m/z	299.223	10.621	neg	cis-9-palmitoleic acid	LMFA01030056	Lipids and lipid-like molecules	Fatty Acyls	Fatty acids and conjugates	**	C08362	46.5	35.5	M+FA-H	C16H30O2	-0.741644	2.08065	0.0455023	0.307786	-1.1432	0.452754	32689.8	72202.2	50023.7	25098.2	27397.7	39244.7	25281	29093.7	83116.4	65625.9	118066	18332.9	114716	33356.2
0.71_203.1501m/z	203.15	0.709233	pos	Isocarbamid	72796	Unclassified	Unclassified	Unclassified			38	0	M+NH4	C8H15N3O2	-0.719678	2.06416	0.0233406	0.233868	0.881541	1.84234	82253	44645.9	55240.7	149839	69323.7	83687.5	68589.2	66837.8	49074.5	45921.4	42645.2	44799.2	40368.3	45066.7
12.11_271.2277m/z	271.228	12.1118	neg	2-hydroxyhexadecanoic acid	34495	Lipids and lipid-like molecules	Fatty Acyls	Fatty acids and conjugates	*		52.2	64.6	M-H	C16H32O3	-0.610425	2.03197	0.00929867	0.164401	0.537728	1.45168	104412	71924.6	100008	72675.3	88530.4	113100	116622	135535	56706.5	76510.1	65510.3	88021.5	77057.7	67741.7
6.48_499.2966n	522.286	6.48355	pos	5β-CHOLANIC ACID-3α, 12α-DIOL N-(2-SULPHOETHYL)-AMIDE	44688	Unclassified	Unclassified	Unclassified			57.2	94.3	M+H, M+Na, M+H-H2O	C26H45NO6S	-0.377006	2.00546	0.0128854	0.186044	1.04343	2.06112	67810.9	32900.1	72587	26891.4	54120.8	97107.6	84472	71686.9	23107.5	45731.5	20233.1	52878.2	20707.4	34742.9
9.22_660.1677m/z	660.168	9.22272	neg	Pelargonidin 3,5-di-(6-acetylglucoside)	LMPK12010045	Unclassified	Unclassified	Unclassified			48.4	51.3	M-H2O-H	C31H35O17+	-2.7579	2.00243	0.00756213	0.150094	-1.2249	0.427828	23487.2	54898.8	20852.1	12879.4	21326	26063.6	17837.1	41965.3	55685.8	59929.5	47937.2	91941.6	42753.4	31145.6
0.78_247.0423m/z	247.042	0.784133	pos	(1R,2R)-3-[(1,2-Dihydro-2-hydroxy-1-naphthalenyl)thio]-2-oxopropanoic acid	70331	Unclassified	Unclassified	Unclassified			38.1	0	M+H-H2O	C13H12O4S	-0.232218	1.97987	0.012249	0.180822	1.98202	3.95045	44722.7	11320.9	89391.5	42913.5	52714.1	32643.5	34207.4	16465.9	4089.23	9954.95	7344.17	6023.44	9707.23	30806.4
6.35_464.3015m/z	464.302	6.3521	neg	N-Palmitoyl tyrosine	HMDB0062340	Organic acids and derivatives	Carboxylic acids and derivatives	Amino acids, peptides, and analogues			41.3	8.81	M+FA-H	C25H41NO4	-0.526562	1.97822	0.0064729	0.14036	1.55102	2.93024	44000.7	15016.1	29259.4	72605.5	36360.2	42907.4	21187	61684.7	13143.5	13076.7	24180.1	6732.77	21666.3	11297
0.78_295.0660m/z	295.066	0.784133	pos	Pyridine N-oxide glucuronide	HMDB0061177	Organic oxygen compounds	Organooxygen compounds	Carbohydrates and carbohydrate conjugates			50	55.3	M+Na	C11H14NO7+	-0.932638	1.97663	0.00787793	0.15345	1.39603	2.63177	53179.1	20206.6	73673.8	84091.3	42818.9	26791.9	55994.7	35703.9	9467.87	26054	31211.9	8073.5	28128.4	18303.9
0.75_137.0475n	138.055	0.745383	pos	Salicylamide	43329	Benzenoids	Phenols	1-hydroxy-4-unsubstituted benzenoids			43.5	22.7	M+H, M+Na	C7H7NO2	-1.02624	1.97599	0.00335921	0.104036	2.11566	4.33389	38797.2	8952.05	31070.6	29015.6	74234.6	19052.4	41818.1	37592.1	7666.32	10104.2	10197.9	7299.99	11424.1	7019.79
12.74_381.3237n	382.331	12.7412	pos	N-stearoyl proline	LMFA08020119	Lipids and lipid-like molecules	Fatty Acyls	Fatty amides			38.1	0	M+H, M+Na	C23H43NO3	-1.46607	1.93915	0.000508526	0.043759	-0.419353	0.74776	74362.4	99446.9	82055.7	82204.2	79152.8	67791.3	69709.3	65261.3	104603	112681	89672.9	105676	90239.6	93809.7
11.47_453.3359m/z	453.336	11.4671	pos	beta-Glycyrrhetinic acid	HMDB0034517	Lipids and lipid-like molecules	Prenol lipids	Triterpenoids	*		48.4	50.3	M+H-H2O	C30H46O4	-0.933235	1.91589	0.00909661	0.163573	13.8619	14888.7	26961.3	1.81086	16713.8	32712.4	15747.7	11155.5	19415.9	66022.4	0.000228787	0.000228787	0.000228787	10.864	0.000228787	0.000228787
11.11_1063.6935m/z	1063.69	11.1083	neg	GM4(d18:1/18:0)	LMSP0601AA02	Lipids and lipid-like molecules	Sphingolipids	Acidic glycosphingolipids			43.6	27.4	M+FA-H	C53H98N2O16	3.58401	1.90618	0.026969	0.245265	-0.316946	0.802767	137701	171532	139294	136701	187055	97740.8	123299	142113	167020	165791	174384	175315	193029	153656
12.05_862.5061m/z	862.506	12.0502	pos	PS(22:6(4Z,7Z,10Z,13Z,16Z,19Z)/22:6(4Z,7Z,10Z,13Z,16Z,19Z))	LMGP01030017	Lipids and lipid-like molecules	Glycerophospholipids	Glycerophosphoserines	*		36.3	0	M+H-H2O	C50H74NO10P	4.94191	1.86574	0.0316096	0.262309	-0.997998	0.500694	29048.2	58015.9	41762.5	27208	30971.2	22269.2	25574.9	26503.8	43845.6	30250.7	110520	54434.6	50122.6	58922.2
0.76_243.0853n	226.082	0.764333	pos	Cytidine	HMDB0000089	Nucleosides, nucleotides, and analogues	Pyrimidine nucleosides	Unclassified	**	C00475	44.1	23.2	M+H-H2O, M+H, M+Na	C9H13N3O5	-0.80292	1.85299	0.0434426	0.301658	1.30863	2.47705	55242.2	22301.6	37176	125818	44508.2	47012.9	39901	37036.7	18806.8	25302.6	21114.8	19725.5	24881.4	23978.3
0.63_129.0790n	147.113	0.629117	pos	L-Pipecolic acid	HMDB0000716	Organic acids and derivatives	Carboxylic acids and derivatives	Amino acids, peptides, and analogues	***	C00408	55.2	81.3	M+H, M+NH4, M+H-H2O	C6H11NO2	0.193239	1.84297	0.0478657	0.314211	0.280878	1.21493	169396	139428	181265	169472	140087	195277	152468	177805	114857	138620	132862	134006	127277	188948
0.82_261.0580m/z	261.058	0.824433	pos	3,4,5-trihydroxy-6-(2-hydroxyethoxy)oxane-2-carboxylic acid	HMDB0131294	Organic oxygen compounds	Organooxygen compounds	Carbohydrates and carbohydrate conjugates			43.7	22.7	M+Na	C8H14O8	-0.397676	1.8219	0.0102915	0.171685	1.94833	3.85926	36138.9	9364.21	62214.8	42585.1	41598.4	26120.8	29930.4	14384.1	2686.08	5242.46	4123.21	2618.6	6500.09	35014.8
8.05_565.2838m/z	565.284	8.04553	neg	Mesoporphyrin IX	6655	Organoheterocyclic compounds	Tetrapyrroles and derivatives	Porphyrins			37.8	0	M-H	C34H38N4O4	3.2081	1.7951	0.020589	0.222663	18.5811	392171	25318.2	0.064559	18304	17967.4	9318.14	33496.8	5781.16	67041.6	0.000228787	0.38621	0.000228787	0.000228787	0.000228787	0.000228787
11.18_297.2665n	320.256	11.184	pos	4E,14Z-Sphingadiene	LMSP01080002	Lipids and lipid-like molecules	Sphingolipids	Sphingoid bases			44.5	28.7	M+H-H2O, M+H, M+Na	C18H35NO2	-0.878723	1.77814	0.00468458	0.122914	-1.04662	0.4841	26330	54389.7	23851.1	31691	25237	22008.6	27831.3	27361.4	61338.9	52647.6	33175.9	40471.9	52017.6	86686.2
11.57_834.5290m/z	834.529	11.5651	neg	PE(18:3(6Z,9Z,12Z)/22:4(7Z,10Z,13Z,16Z))	HMDB0009141	Lipids and lipid-like molecules	Glycerophospholipids	Glycerophosphoethanolamines	**	C00350	37.9	0	M+FA-H	C45H76NO8P	-0.0901156	1.75919	0.000654152	0.0500698	-0.871465	0.546591	25054.7	45838.1	31171.3	28895.1	23659.1	23377.8	21499.7	21725.3	57164.4	59005.7	42221.1	37377.2	40835.5	38424.8
11.14_548.3706m/z	548.371	11.1396	pos	LysoPC(20:2(11Z,14Z))	HMDB0010392	Lipids and lipid-like molecules	Glycerophospholipids	Glycerophosphocholines	**	C04230	52.1	64.9	M+H	C28H54NO7P	-0.886927	1.75475	0.0180725	0.212371	0.302884	1.23361	140141	113602	115822	158008	147141	128031	147110	144732	103766	129449	126061	84993.9	111508	125837
7.11_449.3140n	432.311	7.11048	pos	Chenodeoxyglycocholic acid	HMDB0006898	Lipids and lipid-like molecules	Steroids and steroid derivatives	Bile acids, alcohols and derivatives	*	C05462	54.3	76.1	M+H-H2O, M+H	C26H43NO5	-0.296518	1.72256	0.00364306	0.10721	2.27191	4.82961	29524.9	6113.31	17294.9	23448.9	19955.8	31470.1	55331.2	29648.5	2050.29	16930.8	586.629	10067.7	870.363	6174.06
7.59_511.3021m/z	511.302	7.59025	neg	PG(18:0/0:0)[U]	40877	Unclassified	Unclassified	Unclassified			38.5	0	M-H	C24H49O9P	-3.89705	1.71327	0.000198179	0.0310078	1.40751	2.65279	31582	11905.2	33497.7	22071.9	29206.1	38716.9	35277.3	30722.2	11759.5	17571.8	4418.69	18139.1	4468.36	15073.8
11.86_402.2250n	425.214	11.8559	pos	Acetyl tributyl citrate	89746	Organic acids and derivatives	Carboxylic acids and derivatives	Tetracarboxylic acids and derivatives			45.9	38.9	M+H, M+Na	C20H34O8	-0.866383	1.71271	0.00184413	0.0773655	-0.280378	0.823375	96516.3	117220	101724	102831	92280.2	98486.4	90129.7	93647.1	134315	126407	115026	107715	112662	107198
8.17_381.1716m/z	381.172	8.16895	neg	Tephrowatsin B	LMPK12020283	Lipids and lipid-like molecules	Polyketides	Flavonoids			39.6	4.9	M+FA-H	C22H24O3	2.53728	1.69948	0.00564535	0.133531	1.12113	2.17518	42144.5	19375.2	33391.8	32920.6	49133.4	70707.6	29822.4	36891	17491.2	24393.9	20776.6	15219.3	16993.1	21377
0.80_132.0245n	150.058	0.803933	pos	THTC	68817	Unclassified	Unclassified	Unclassified			40.9	7.98	M+H, M+NH4	C5H8O2S	0.00526062	1.67284	0.0122901	0.180974	-0.394382	0.760815	78632.1	103352	86058.9	78221.3	79554.7	67871.9	72196.6	87889.2	82242.6	99072.5	98018.6	131806	90895.6	118079
4.03_488.2475m/z	488.248	4.03342	pos	Gentamicin C1a	3051	Unclassified	Unclassified	Unclassified			36.9	0	M+K	C19H39N5O7	-1.32049	1.67142	0.023165	0.233417	-2.27255	0.206963	6835.49	33027.6	563.634	0.000228787	92.9799	398.498	131.375	39826.4	651.453	47902.8	47271.3	32243.7	41446.6	28649.5
9.16_361.1632m/z	361.163	9.16182	neg	Thyrotropin releasing hormone	HMDB0060080	Organic acids and derivatives	Carboxylic acids and derivatives	Amino acids, peptides, and analogues		C03958	42.3	15.3	M-H	C16H22N6O4	0.594742	1.6668	0.00226029	0.0854629	-0.454701	0.729662	60963.4	83550.2	50349.5	70003.9	71690.6	56501.2	59094.8	58140.3	92231.2	79522.7	68850	81652.5	79478.3	99566.4
1.25_259.0423m/z	259.042	1.24765	pos	6-(acetyloxy)-3,4,5-trihydroxyoxane-2-carboxylic acid	HMDB0124934	Organic oxygen compounds	Organooxygen compounds	Carbohydrates and carbohydrate conjugates			43	18.4	M+Na	C8H12O8	-0.467737	1.60106	0.0294987	0.253834	3.60192	12.1419	26748.2	2202.97	64364.4	1141.36	23855.9	44639	10206.5	16282	580.092	3071.69	578.807	1474.61	1136.36	6376.28
12.96_336.3256m/z	336.326	12.9564	pos	N-isobutyl-2E,4Z-octadecadienoyl amine	LMFA08020207	Lipids and lipid-like molecules	Fatty Acyls	Fatty amides			39	3.75	M+H	C22H41NO	-1.58484	1.58662	0.00609246	0.137141	-0.168177	0.889966	148081	166389	164803	146835	149675	143376	145795	138000	181356	170033	169514	155531	160017	161884
1.02_135.0300m/z	135.03	1.02497	neg	Glyceraldehyde	HMDB0001051	Organic oxygen compounds	Organooxygen compounds	Carbohydrates and carbohydrate conjugates		C02154	40.3	5.46	M+FA-H	C3H6O3	1.00726	1.57787	0.000860947	0.0557402	0.897004	1.86219	38162.1	20493.1	50629.1	36179.2	34744.8	41219.1	29921.5	36278.9	12921.7	28194.8	22993.3	14314.7	24204.9	20329.1
4.26_723.3535m/z	723.353	4.25752	pos	Chalcomycin	71013	Unclassified	Unclassified	Unclassified			36.6	0	M+Na	C35H56O14	-3.93284	1.56976	0.0335958	0.268688	-2.70379	0.153489	4028.6	26246.8	273.483	288.509	143.944	486.921	770.23	22208.5	646.654	46420.3	44403.2	20695.4	39963.5	5351.72
7.38_465.3089n	448.306	7.37845	pos	3a,7b,12a-Trihydroxyoxocholanyl-Glycine	LMST05030007	Lipids and lipid-like molecules	Steroids and steroid derivatives	Bile acids, alcohols and derivatives	*		50.9	61.7	M+H-H2O, M+Na	C26H43NO6	-0.301247	1.55131	0.00105366	0.062446	1.62736	3.08946	23269.1	7531.75	18470.7	26441.7	18181.1	20087	17339.4	39094.5	7478.03	7097.85	8432.76	6061.97	8135.49	7984.39
9.92_473.3254m/z	473.325	9.91978	pos	3alpha,12alpha,22-Trihydroxy-5beta-cholestan-26-oic acid	LMST04030061	Unclassified	Unclassified	Unclassified			50.2	57	M+Na	C27H46O5	3.63575	1.53998	0.00991612	0.168109	2.31303	4.96924	22289.4	4485.47	11500.2	21554.5	7705.31	23131.9	22794.4	47049.9	4674.84	4317.08	4531.07	4367.11	4419.27	4603.42
5.89_1005.5218m/z	1005.52	5.89425	pos	Carbetocin	HMDB0015402	Organic acids and derivatives	Carboxylic acids and derivatives	Amino acids, peptides, and analogues			37	0	M+NH4	C45H69N11O12S	3.19715	1.53635	0.0126047	0.183681	0.805681	1.74797	40929	23415.1	36795.9	32664.4	33918.2	47696.4	31304.1	63194.9	17230.2	13370.5	26481.8	24411.2	27525.9	31471.1
5.81_317.1245m/z	317.124	5.80623	neg	Mitomycin C hydroquinone	750	Unclassified	Unclassified	Unclassified			36.9	0	M-H2O-H	C15H20N4O5	-3.19022	1.53627	0.0413267	0.295259	0.893979	1.85829	50597	27227.6	78789.1	52709.1	23097	56158.1	37959.7	54868.8	37352.8	54540.7	18503.4	14435.8	16789.6	21743.6
0.71_137.0709m/z	137.071	0.709233	pos	Trigonellinamide	274	Organoheterocyclic compounds	Pyridines and derivatives	Pyridinecarboxylic acids and derivatives	**	C02918	44.6	25.6	M+H	C7H8N2O	-0.358225	1.5343	0.00223652	0.0849376	2.01489	4.04149	22298.8	5517.48	22010.7	38512.4	26098.8	17682.1	7983.56	21505.5	6653.54	6362.33	5898.64	4259.04	5442.19	4489.11
12.37_293.1792m/z	293.179	12.3748	neg	Sodium Tetradecyl Sulfate	HMDB0014607	Organic acids and derivatives	Organic sulfuric acids and derivatives	Sulfuric acid esters			40.2	6.47	M-H	C14H30O4S	-0.0726247	1.53326	0.038384	0.285756	-0.0584239	0.960313	527893	549710	524712	522248	557454	529930	507641	525374	565191	542653	546959	571680	538646	533130
9.24_473.3259m/z	473.326	9.23902	pos	(3beta,17alpha,23R)-17,23-Epoxy-3,29-dihydroxy-27-norlanost-8-ene-15,24-dione	HMDB0035112	Lipids and lipid-like molecules	Prenol lipids	Triterpenoids	*		52.2	65.8	M+H	C29H44O5	-0.577943	1.51207	0.00327765	0.101975	3.72341	13.2087	18747.1	1419.3	17512.9	28327.9	12401.9	35874.2	8328.02	10037.8	1648.13	1782.7	1343.36	1253.96	1156.67	1331
4.10_677.3160m/z	677.316	4.10155	neg	N-Didesethylquinagolide	2209	Unclassified	Unclassified	Unclassified			37.4	0	2M-H	C16H25N3O3S	-0.0325713	1.50922	0.017764	0.210934	-3.38923	0.0954421	1987.92	20828.5	0.000228787	0.000228787	79.7087	127.201	0.000228787	11720.6	400.145	40003.2	23780.7	34338.7	21014.5	5433.64
11.39_537.3197m/z	537.32	11.3923	neg	1-(11Z-docosenoyl)-glycero-3-phosphate	HMDB0062304	Lipids and lipid-like molecules	Glycerophospholipids	Glycerophosphates	*		39	0	M+FA-H	C25H49O7P	-0.141388	1.48108	0.00858168	0.159972	26.0606	6.99874e+07	16012.2	0.000228787	10308.1	21293.1	9272.5	6806.58	10064.7	38328.5	0.000228787	0.000228787	0.000228787	0.000228787	0.000228787	0.000228787
0.73_444.1343m/z	444.134	0.728567	neg	Niaziminin A	HMDB0031945	Organic oxygen compounds	Organooxygen compounds	Carbohydrates and carbohydrate conjugates			36.2	0	M+FA-H	C18H25NO7S	2.20369	1.47625	0.00485403	0.124553	-1.11427	0.461926	14019.5	30350.2	18226	0.000228787	15536.6	10294.1	25440	14620.5	16430	29406.2	34583	34599.6	31899.9	35182.4
7.59_484.2833m/z	484.283	7.59025	neg	PE(0:0/20:3(11Z,14Z,17Z))	LMGP02050048	Lipids and lipid-like molecules	Glycerophospholipids	Glycerophosphoethanolamines			36.1	0	M-H2O-H	C25H46NO7P	-0.122595	1.45463	0.000124541	0.0260501	1.39829	2.63589	22562.7	8559.82	24477.5	16187	22364.7	25403.7	25167.7	21775.8	8142.81	11779.3	3367.01	13902.1	3160.87	11006.9
7.06_736.2513m/z	736.251	7.06112	neg	Alpha-Tetrasaccharide	HMDB0000445	Organic oxygen compounds	Organooxygen compounds	Carbohydrates and carbohydrate conjugates		C06768	41	10.8	M+FA-H	C26H45NO20	-0.522201	1.42361	0.0236959	0.234929	1.39835	2.636	26133	9913.9	24459.8	35502.1	22267.9	16571.7	10073.2	47923.5	10637.5	7019.97	14106.7	2629.9	19183	5906.4
11.72_840.5792m/z	840.579	11.723	neg	PC(22:4(7Z,10Z,13Z,16Z)/15:0)	LMGP01012070	Lipids and lipid-like molecules	Glycerophospholipids	Glycerophosphocholines	*		37.4	0	M+FA-H	C45H82NO8P	4.0538	1.42175	0.0494253	0.31893	-0.563514	0.676652	48389.4	71513	61142.5	49604.9	51902.6	46749.3	36868.9	44068.1	75806.2	62843	36614.5	105794	60195.3	87825.3
10.76_318.2400m/z	318.24	10.7632	pos	Linoleyl hydroxamic acid	LMFA08020211	Lipids and lipid-like molecules	Fatty Acyls	Fatty amides			39.2	2.71	M+Na	C18H33NO2	-1.11768	1.41971	0.00122044	0.0658456	-1.06279	0.478705	14430.7	30145.2	11225.3	15278.4	14035.4	15989.3	16631.3	13424.4	38653.7	22741	23840.8	23076.5	30748.4	41811.1
6.60_496.2737m/z	496.274	6.60152	neg	Taurallocholic acid	HMDB0000922	Lipids and lipid-like molecules	Steroids and steroid derivatives	Bile acids, alcohols and derivatives	*		38.1	0	M-H2O-H	C26H45NO7S	-0.161463	1.41254	0.0167872	0.205066	1.42592	2.68685	28329.7	10543.8	28109.8	12040.2	19304.5	40838.3	36415.3	33270.1	3480.02	27929.1	2072.39	18295.9	1726.08	9759.47
4.10_582.2573m/z	582.257	4.10032	pos	Gluten exorphin A5	HMDB0059793	Organic acids and derivatives	Carboxylic acids and derivatives	Amino acids, peptides, and analogues			37	3.93	M+H-H2O	C29H37N5O9	2.50921	1.4085	0.0106846	0.172501	-2.94667	0.129707	2386.89	18402.1	0.000228787	284.376	88.4636	0.000228787	0.000228787	13948.5	184.644	30034.5	26515	21417	22146.3	10115.4
1.04_132.0245n	150.058	1.0359	pos	3-methyl sulfolene	96259	Organoheterocyclic compounds	Dihydrothiophenes	Unclassified			39.3	5.68	M+H, M+NH4	C5H8O2S	-0.12007	1.38597	0.0242546	0.235844	-0.316162	0.803204	74537	92799.6	82573.5	71148.6	75109.4	67366.6	67745	83278.7	68766.5	90781.8	93192.8	113296	86500.3	104260
10.23_771.5139m/z	771.514	10.2327	pos	PG(16:0/18:1(9Z))	LMGP04010987	Lipids and lipid-like molecules	Glycerophospholipids	Glycerophosphoglycerols	*		36.6	0	M+Na	C40H77O10P	-1.06799	1.38549	0.000120949	0.0260501	-0.767826	0.587302	18091.9	30805.1	16357.1	14320.8	16980	15588.3	21381.4	23924	27598	31262.6	33533.8	28213.3	36241.6	27981.5
0.75_162.0759m/z	162.076	0.745383	pos	Aminoadipic acid	HMDB0000510	Organic acids and derivatives	Carboxylic acids and derivatives	Amino acids, peptides, and analogues	***	C00956	39	0	M+H	C6H11NO4	-1.17185	1.38468	0.0161967	0.202959	0.684567	1.60722	44026.3	27392.8	47932.3	48286.1	25451.8	38751.5	51617.8	52118.1	21669.6	41724.1	31531	12941.5	27502	28988.8
8.48_1033.5178m/z	1033.52	8.47568	neg	Asparagoside F	HMDB0029321	Lipids and lipid-like molecules	Steroids and steroid derivatives	Steroidal glycosides	*		53.9	83.5	M-H	C50H82O22	-4.52901	1.36584	0.020189	0.220299	0.46912	1.38426	52522.6	37942.6	47387.8	61243.6	49858.5	56869.3	40447	59329.5	22419.3	41952.3	35198.3	40482.9	34368.5	53234.5
1.14_153.0789n	136.076	1.14185	pos	Dopamine	HMDB0000073	Benzenoids	Phenols	Benzenediols	**	C03758	41.7	11.6	M+H-H2O, M+H	C8H11NO2	-0.225141	1.35214	0.0377549	0.285175	0.298116	1.22954	92429.3	75174	107304	112290	72872.2	99512.8	77948.5	84648.4	64219.8	74305.5	75378.2	81925.3	72002.5	83212.9
4.23_678.3624m/z	678.362	4.23487	pos	Jubanine A	HMDB0030205	Organic acids and derivatives	Carboxylic acids and derivatives	Amino acids, peptides, and analogues			41.1	21.7	M+H-H2O	C40H49N5O6	-3.74654	1.33933	0.025615	0.240344	5.09165	34.0989	17420.1	510.87	3764.92	121.96	26288.2	9203.66	41435.3	23706.4	0.000228787	86.9191	1398.99	381.554	1148.66	49.0901
12.89_270.2787m/z	270.279	12.891	pos	5-Ethyl-2-pentadecen-4-one	LMFA12000264	Lipids and lipid-like molecules	Fatty Acyls	Oxygenated hydrocarbons			47.2	41.3	M+NH4	C17H32O	-1.67563	1.32906	0.00528706	0.12887	-0.0827738	0.94424	231425	245091	237442	234067	238267	225091	232078	221603	252599	249443	237464	241937	238465	250637
12.44_297.2896m/z	297.29	12.4403	pos	Linoleamide	LMFA08010008	Lipids and lipid-like molecules	Fatty Acyls	Fatty amides	*		39.5	3.31	M+NH4	C18H33NO	-1.4859	1.31581	0.00632767	0.139586	-0.690236	0.619752	24038.7	38787.6	22368.6	25035.1	23298.6	25388.6	24674.5	23466.7	33608	39185.2	39459.6	27519.9	34817.7	58134.8
6.51_526.2478m/z	526.248	6.50622	neg	N-[(3a,5b,7a,12a)-3,12-dihydroxy-24-oxo-7-(sulfooxy)cholan-24-yl]-Glycine	HMDB0002640	Lipids and lipid-like molecules	Steroids and steroid derivatives	Bile acids, alcohols and derivatives	*		49	56.2	M-H2O-H	C26H43NO9S	-0.441379	1.31109	0.00353953	0.105766	3.26015	9.58085	14822.3	1547.07	7302.98	29305.1	13454.1	9875.43	19682.8	9313.18	0.000228787	5601.9	457.721	1311.62	431.422	1479.77
9.81_460.2689m/z	460.269	9.80908	pos	3-O-Acetylepisamarcandin	HMDB0031958	Phenylpropanoids and polyketides	Coumarins and derivatives	Unclassified			53.7	71.6	M+NH4	C26H34O6	-1.01754	1.31018	0.0454074	0.307603	0.207564	1.15474	133434	115554	142514	131570	115259	166081	120166	125016	118471	110948	118565	121760	110654	112925
6.90_271.1550m/z	271.155	6.90325	neg	4,5-Dihydrovomifoliol	HMDB0040615	Lipids and lipid-like molecules	Prenol lipids	Sesquiterpenoids	*		51.1	57.6	M+FA-H	C13H22O3	-0.388662	1.29942	0.0125266	0.182791	2.11956	4.34561	18398.2	4233.75	17252.3	12308.5	39844.8	15756.4	7829.58	17397.8	2745.36	5667.31	6295.32	1459.6	7620.77	1614.14
12.48_311.1635m/z	311.163	12.4827	pos	avobenzone	3932	Unclassified	Unclassified	Unclassified			42.8	20.2	M+H	C20H22O3	-2.28612	1.29641	0.0219567	0.228013	-0.115258	0.923217	163908	177540	177081	162064	170973	163584	159838	149910	186483	189074	173347	172191	171357	172790
2.71_218.1028m/z	218.103	2.7116	neg	Pantothenic acid	HMDB0000210	Organic oxygen compounds	Organooxygen compounds	Alcohols and polyols	***	C00864	52.7	68.6	M-H	C9H17NO5	-2.68806	1.28364	0.0396049	0.288259	0.550501	1.46459	54898.9	37484	56401.5	54484.5	63594.8	40251.3	75718.7	38942.5	15495.4	40436.7	42798.4	39028.3	38631.5	48513.8
10.82_430.3080n	475.306	10.8218	neg	(25R)-3beta-hydroxycholest-5-en-7-one-26-oate	HMDB0062613	Lipids and lipid-like molecules	Steroids and steroid derivatives	Bile acids, alcohols and derivatives	*		42.5	16.1	M-H, M+FA-H	C27H42O4	-0.823646	1.26875	0.0368898	0.281919	0.365252	1.28811	78471.4	60920	96456.5	60751.3	76453.3	96878.1	78205.1	62084.2	52649.4	55453.1	70777.3	66670.3	52360	67609.7
6.47_634.2642m/z	634.264	6.4711	neg	CAY10633	64757	Unclassified	Unclassified	Unclassified			37.7	0	M+FA-H	C34H39NO8	-2.6836	1.24458	0.00944418	0.165623	1.21354	2.31905	23553.3	10156.4	29695.6	8755.05	17712.1	30252.3	31869	23035.9	8613.99	12834.3	6214.47	18512.5	5214.01	9549.36
11.47_515.3376m/z	515.338	11.4693	neg	Ganoderiol B	HMDB0035327	Lipids and lipid-like molecules	Prenol lipids	Triterpenoids	*		51.1	63.9	M+FA-H	C30H46O4	-0.499414	1.2409	0.0146918	0.196652	25.6107	5.12365e+07	11722.3	0.000228787	7604.22	15634.4	6250.08	3852.29	7098.9	29893.7	0.000228787	0.000228787	0.000228787	0.000228787	0.000228787	0.000228787
7.40_229.1441m/z	229.144	7.40102	neg	(Z)-3-Methyl-4-decenoic acid	HMDB0031063	Lipids and lipid-like molecules	Fatty Acyls	Fatty acids and conjugates	*		45	28.9	M+FA-H	C11H20O2	-2.48232	1.22609	3.07794e-05	0.0200243	1.39036	2.62144	16042.8	6119.83	18420.2	11861.1	17897	16643	16820.6	14614.6	6146.49	10761.2	5507.16	4248.49	4655.57	5400.05
13.08_619.4576m/z	619.458	13.0812	neg	Annoglaucin	HMDB0029962	Lipids and lipid-like molecules	Fatty Acyls	Fatty alcohols	*		44	30.8	M-H2O-H	C37H66O8	-0.556858	1.22608	0.000271814	0.0340052	-2.08042	0.236446	2946.55	12461.8	3368.53	2254.52	3708.83	2459.48	3184.99	2702.94	6879.64	18008.9	15671	12335.2	13407.1	8469.14
13.45_527.2982m/z	527.298	13.4487	pos	Desglucocoroloside	HMDB0033709	Lipids and lipid-like molecules	Steroids and steroid derivatives	Steroid lactones	*		36.2	4	M+Na	C29H44O7	0.630599	1.22114	0.00770645	0.151412	-0.305117	0.809376	45938.8	56758.3	50611.4	50794.3	47320.7	50851.7	43063	32991.9	58308.5	60479.1	55225.5	60477.5	55312.5	50746.8
7.60_545.2670m/z	545.267	7.59527	pos	(1S,16R)-5,6,7,11-tetrahydroxy-8,8,10,12,16-pentamethyl-3-[1-(2-methyl-1,3-thiazol-4-yl)prop-1-en-2-yl]-17-oxa-4-azabicyclo[14.1.0]heptadec-4-en-9-one	HMDB0127535	Organoheterocyclic compounds	Azoles	Thiazoles			51.3	68.1	M+Na	C27H42N2O6S	2.78545	1.22015	0.000441149	0.0405261	1.51046	2.84902	15588.6	5471.57	12869.2	11610	13301.4	16943.9	20984.8	17822.4	4060.81	7838.4	2246.02	9089.11	1629.63	7965.48
6.64_539.2860m/z	539.286	6.63975	neg	(3b,4b,11b,14b)-11-Ethoxy-3,4-epoxy-14-hydroxy-12-cyathen-15-al 14-xyloside	HMDB0034617	Lipids and lipid-like molecules	Prenol lipids	Diterpenoids	*		47.8	40.9	M+FA-H	C27H42O8	-0.249048	1.21805	0.0434045	0.301604	6.89497	119.013	14573	122.449	2531.45	40453.9	16966.8	22420.8	2281.93	2782.96	0.000228787	670.632	56.7998	0.000228787	7.26001	0.000228787
8.01_494.3123m/z	494.312	8.01372	neg	Chenodeoxycholic acid glycine conjugate	HMDB0000637	Lipids and lipid-like molecules	Steroids and steroid derivatives	Bile acids, alcohols and derivatives	**	C05466	57.5	90.2	M+FA-H	C26H43NO5	-0.0319868	1.21485	0.000186292	0.0305479	2.05937	4.16805	13424.1	3220.72	13352.4	11999.5	9254.96	18337.5	17472.9	10127.3	3586.2	2633.64	1682.33	7354.47	1312.12	2755.55
5.36_473.1452m/z	473.145	5.36358	neg	12-Dihydrodalbinol	LMPK12060042	Lipids and lipid-like molecules	Polyketides	Flavonoids			40.4	4.24	M+FA-H	C23H24O8	-0.340604	1.2091	0.0475667	0.313636	-1.10877	0.46369	11712.6	25259.6	8282.69	11211.7	21731.5	5162.05	11886.3	12001.6	12152	44665.9	34727.8	11050.6	30949.5	18012
0.76_144.1018m/z	144.102	0.764333	pos	Proline betaine	7089	Organic acids and derivatives	Carboxylic acids and derivatives	Amino acids, peptides, and analogues		C10172	42.6	15.9	M+H	C7H13NO2	-0.815718	1.2063	0.0441738	0.303455	0.540015	1.45399	51551.6	35455.3	46654.5	40572.5	69020.3	32837.6	69758.7	50466	25153.8	36791	41020.3	45147.2	38743.8	25876
7.04_242.1758m/z	242.176	7.03615	neg	N-methylundec-10-enamide	65467	Unclassified	Unclassified	Unclassified			39.1	0	M+FA-H	C12H23NO	-1.84227	1.20184	0.0341743	0.271875	-0.143869	0.905089	108337	119698	114556	105244	104997	110433	115080	99712.7	122253	112579	137784	112027	117199	116344
10.52_549.2892m/z	549.289	10.5238	neg	Protoporphyrinogen IX	HMDB0001097	Organoheterocyclic compounds	Tetrapyrroles and derivatives	Porphyrins	**	C01079	37.4	0	M-H2O-H	C34H40N4O4	3.60985	1.19894	0.00080616	0.054931	25.2888	4.09906e+07	9378.12	0.000228787	7701.49	14279	5956.63	10127.7	2826.49	15377.4	0.000228787	0.000228787	0.000228787	0.000228787	0.000228787	0.000228787
10.41_356.3518m/z	356.352	10.4094	pos	Eicosanoyl-EA	3723	Lipids and lipid-like molecules	Fatty Acyls	Fatty amides			45.7	35	M+H	C22H45NO2	-1.3054	1.19668	0.0227323	0.23186	0.769711	1.70493	33417	19600.2	56508.5	34194	25781.5	34560.7	27502.9	21954.3	21293.7	15404	21402.3	22083	18127.5	19290.9
0.79_173.0082m/z	173.008	0.790517	neg	Phenylmethanesulfonyl fluoride	66517	Unclassified	Unclassified	Unclassified			38	0	M-H	C7H7FO2S	2.02827	1.19059	0.00889752	0.163033	1.41173	2.66056	17910.5	6731.83	27122.3	4539.73	20699.6	20198.8	15307.5	19595	4139.69	7348.48	3088.07	8781.93	4026.61	13006.2
4.62_232.9854m/z	232.985	4.61802	pos	2-(2H-1,3-benzodioxol-5-yl)-2-oxoacetic acid	HMDB0129377	Organoheterocyclic compounds	Benzodioxoles	Unclassified			38.1	0	M+K	C9H6O5	3.84927	1.18577	0.000232299	0.0331578	-2.02875	0.245067	3131.6	12778.6	1740.49	1292.84	2184.47	1387.67	3601.15	8583	11825.9	12880	15458.9	8462.18	17221.4	10823.1
10.08_460.2689m/z	460.269	10.0773	pos	Pectachol	HMDB0039064	Phenylpropanoids and polyketides	Coumarins and derivatives	Unclassified			51.9	62.1	M+NH4	C26H34O6	-1.14688	1.18315	0.0226741	0.231439	0.135979	1.09884	159706	145341	169144	146772	156388	169887	160929	155117	145802	137393	156652	147437	153524	131239
6.00_498.2894m/z	498.289	6.00073	neg	Taurodeoxycholic acid	57998	Lipids and lipid-like molecules	Steroids and steroid derivatives	Bile acids, alcohols and derivatives	*	C05463	38.2	0	M-H	C26H45NO6S	-0.0728452	1.17326	0.00901547	0.163573	1.63613	3.10831	16828.2	5413.93	16734	7785.56	11326	16055.8	26362.2	22705.6	1667.51	12263.9	1035.91	11518.7	1074.53	4922.99
6.22_624.3388m/z	624.339	6.21813	neg	Glycochenodeoxycholic acid 3-glucuronide	LMST05010048	Lipids and lipid-like molecules	Steroids and steroid derivatives	Steroidal glycosides	**	C03033	45.1	30.2	M-H	C32H51NO11	-0.148817	1.16988	0.0145976	0.196217	2.82377	7.0801	13413.3	1894.51	7042.37	31406.7	16590.2	6977.25	9399.9	9063.29	997.018	3636.16	1166.72	3024.07	615.708	1927.37
7.06_527.2973m/z	527.297	7.06112	neg	Westiellamide	71070	Unclassified	Unclassified	Unclassified			38.2	0	M-H2O-H	C27H42N6O6	-2.66522	1.1697	0.0302836	0.257248	1.5674	2.9637	16970.7	5726.19	14569.9	22709.3	14188.2	10114.7	5761.58	34480.6	5610.56	3722.22	9121.86	1637.12	11282.9	2982.51
4.10_595.2905m/z	595.291	4.10032	pos	Ganoderic acid H	HMDB0035987	Lipids and lipid-like molecules	Prenol lipids	Triterpenoids	*		36	6.29	M+Na	C32H44O9	4.82305	1.1673	0.0111775	0.175281	-2.91781	0.132328	1826.44	13802.4	0.000228787	0.000228787	0.000228787	0.000228787	0.000228787	10958.7	432.155	12251.2	22780.9	8891.24	18296.2	20162.7
11.73_327.2769n	350.266	11.7252	pos	N-palmitoyl alanine	75505	Lipids and lipid-like molecules	Fatty Acyls	Fatty amides			45.2	33.8	M+H, M+Na	C19H37NO3	-1.34081	1.16632	0.00169626	0.0746352	-0.406303	0.754554	28584.5	37882.6	33390	32435.6	29345.6	27216.6	26038.2	23080.9	41561.1	43030.8	35822.7	37790.7	34709.6	34380.9
4.79_202.1078m/z	202.108	4.79365	neg	N-lactoyl-Leucine	HMDB0062176	Organic acids and derivatives	Carboxylic acids and derivatives	Amino acids, peptides, and analogues	***		43.6	24.1	M-H	C9H17NO4	-3.43065	1.16609	0.000292848	0.0343239	2.00108	4.003	12169.6	3040.11	16697.5	12936.6	6562.1	15986.5	8682.23	12152.5	1285.74	4631.13	3154.96	2848.21	2885.31	3435.31
9.04_533.2845m/z	533.284	9.03725	neg	Metoprolol acid	1254	Unclassified	Unclassified	Unclassified			36.7	0	2M-H	C14H21NO4	-4.44013	1.16267	0.013818	0.191704	2.02305	4.06441	13936.1	3428.82	7072.16	5962.64	12897.7	15009.9	13665.1	29009.3	1634.91	8106.46	1641.75	2730.63	1811.06	4648.11
2.05_191.0582n	209.092	2.048	pos	Desmethyldeschlorobenzoyl Indomethacin	828	Unclassified	Unclassified	Unclassified			48.8	47.7	M+H, M+NH4	C10H9NO3	-0.412989	1.15343	0.0183087	0.21354	0.874827	1.83379	24725.7	13483.4	25980.3	16972.9	30486.1	20650.3	19201.1	35063.2	8674.66	13268.1	11062	26981.3	10474.5	10439.7
11.25_457.2360m/z	457.236	11.2509	neg	1-(5Z,8Z,11Z,14Z-eicosatetraenoyl)-sn-glycero-3-phosphate	HMDB0062312	Lipids and lipid-like molecules	Glycerophospholipids	Glycerophosphates	*		39.9	4.78	M-H	C23H39O7P	-0.0928167	1.14809	0.00498627	0.125311	1.06267	2.08879	20762.6	9940.01	33049.6	20145.6	13554.3	21269.6	18278.5	18278	7740.83	15628.3	8932.8	12401.9	8274.23	6661.99
6.35_465.3091n	466.316	6.35375	pos	Sodium glycocholate	88551	Unclassified	Unclassified	Unclassified			51	58.1	M+H, M+Na	C26H43NO6	0.102825	1.14644	0.00475893	0.123769	1.39955	2.63819	15424.2	5846.49	9764.44	22827.4	15097.3	17265.9	7513.73	20076.3	5774.6	5317.04	8941.98	1977.7	8846.3	4221.32
12.92_788.5777m/z	788.578	12.9248	neg	PC(18:1(9Z)/P-16:0)	HMDB0008126	Lipids and lipid-like molecules	Glycerophospholipids	Glycerophosphocholines	**	C00157	36.1	0	M+FA-H	C42H82NO7P	-4.62879	1.13446	0.0307344	0.25906	0.540717	1.4547	34553.1	23752.8	25641.5	38787.9	32171.9	31367.9	30665	48684.3	22427.1	29749.9	23568.5	15488.4	33151.1	18131.7
4.01_526.2588m/z	526.259	4.01085	pos	Difluprednate	HMDB0015676	Lipids and lipid-like molecules	Steroids and steroid derivatives	Pregnane steroids		C12695	37.2	10.4	M+NH4	C27H34F2O7	-4.46008	1.11805	0.01132	0.175756	5.65959	50.5484	11053.7	218.676	3915.4	848.714	20027.3	8312.23	22193.5	11025.2	503.535	171.315	196.995	82.3117	213.606	144.295
7.60_504.2403m/z	504.24	7.59527	pos	N-acetyl-LTE4	LMFA03020008	Lipids and lipid-like molecules	Fatty Acyls	Eicosanoids	*	C11361	50.6	71.6	M+Na	C25H39NO6S	2.64852	1.11607	0.000152305	0.0291654	1.54794	2.92398	12448.2	4257.29	10166.8	10464.5	11131.4	14058.6	16174	12694.1	3590.26	4889.24	1689.15	7470.44	1444.15	6460.47
9.16_429.1505m/z	429.15	9.16182	neg	Succinylproline	69170	Unclassified	Unclassified	Unclassified			37.8	0	2M-H	C9H13NO5	-2.33276	1.10756	0.000795483	0.054931	-0.508943	0.702737	21937	31216.5	18443	25315.1	25025.1	20003.6	21321.1	21514.2	35259.6	31069.1	25899.5	29949.9	28832	36289.3
5.89_1049.5127m/z	1049.51	5.88808	neg	PIP2(16:0/22:2(13Z,16Z))	HMDB0010045	Lipids and lipid-like molecules	Glycerophospholipids	Glycerophosphoinositol phosphates	*	C00626	38.2	0	M-H	C47H89O19P3	-1.03945	1.1053	0.00780552	0.153137	0.987722	1.98305	17955.2	9054.33	15838.7	16236	12513.5	19156	14542	29445.1	5146.58	6318.03	10947.8	10515.1	10415.4	10983
9.04_511.3023m/z	511.302	9.03725	neg	2-Stearoylglycerophosphoglycerol	HMDB0061703	Lipids and lipid-like molecules	Glycerophospholipids	Glycerophosphoglycerols	*		38.6	0	M-H	C24H49O9P	-3.5302	1.10387	0.0156078	0.200412	2.13583	4.39489	12369.5	2814.51	5948.91	5136.74	12060.4	12206.2	12033.2	26831.3	1438.71	6511.7	1375.7	2412.82	1355.08	3793.05
12.63_264.2678m/z	264.268	12.6334	pos	Elaidamide	LMFA08010011	Lipids and lipid-like molecules	Fatty Acyls	Fatty amides			41.6	21.7	M+H-H2O	C18H35NO	-2.60137	1.09806	0.0237755	0.235095	0.31808	1.24667	51724.9	41490.5	53698.7	49887.6	65550.1	48106.7	45173.6	47933.1	38625.7	48051.9	32619.7	40855.5	48074.6	40715.4
7.59_1055.5764m/z	1055.58	7.59025	neg	Melilotin	89996	Lipids and lipid-like molecules	Prenol lipids	Terpene glycosides	*		37.2	0	M-H2O-H	C54H90O21	-2.97139	1.09347	0.00042249	0.0400762	3.37167	10.3508	9234.19	892.121	9586.93	3668.56	5863.68	11041.3	14144.4	11100.3	657.794	1979.1	0.000228787	2277.96	0.000228787	437.873
6.83_227.1284m/z	227.128	6.82972	neg	Traumatic acid	HMDB0000933	Lipids and lipid-like molecules	Fatty Acyls	Fatty acids and conjugates	***	C16308	51.7	63.3	M-H	C12H20O4	-2.03964	1.09261	0.0159709	0.201972	2.18728	4.55445	13468.6	2957.24	22817	15832.7	13585.4	22423.8	2461.87	3690.86	1673.63	2733	3106.66	2146.98	3395.18	4687.98
7.81_647.3435m/z	647.344	7.80937	neg	Physapruin B	95149	Organoheterocyclic compounds	Benzopyrans	1-benzopyrans	*		39.3	0	M+FA-H	C34H50O9	-0.26419	1.08422	0.00840885	0.158413	25.2152	3.89521e+07	8911.74	0.000228787	2461.65	19096.8	3508.74	4983.98	8794.36	14624.8	0.000228787	0.000228787	0.000228787	0.000228787	0.000228787	0.000228787
0.79_254.9813m/z	254.981	0.790517	neg	Ascorbate 2-sulfate	65843	Unclassified	Unclassified	Unclassified			38.8	0	M-H	C6H8O9S	-1.22063	1.08123	0.0212445	0.225897	-0.653601	0.635692	16707	26281.6	12896.8	11165.2	12783.8	15443.7	28593.3	19359.1	19625.7	35515.3	27050.3	27888.5	26436.4	21173.2
0.80_240.0236n	263.016	0.803933	pos	L-Cystine	HMDB0000192	Organic acids and derivatives	Carboxylic acids and derivatives	Amino acids, peptides, and analogues	**	C00491	36.8	0	M+H, M+Na	C6H12N2O4S2	-0.923171	1.07577	0.0238826	0.235569	1.59765	3.02651	15219.8	5028.83	29610.9	7896.49	19969.4	14906.4	8058.92	10876.7	3259.64	3941.27	3522.34	2442.38	3541.25	13466.1
5.51_464.3015m/z	464.302	5.5144	neg	Tumonoic Acid H	65436	Unclassified	Unclassified	Unclassified			39.5	0	M-H2O-H	C26H45NO7	-0.479489	1.06819	0.0301307	0.256821	1.59017	3.01084	15870.6	5271.16	20593.9	31597	19171.5	9294.46	3968.85	10598.2	6035.44	2513.54	8830.07	3201.65	7779.91	3266.36
0.76_143.0814m/z	143.081	0.764333	pos	Ectoine	43384	Organic acids and derivatives	Carboxylic acids and derivatives	Amino acids, peptides, and analogues	**	C06231	42.8	21.2	M+H	C6H10N2O2	-0.522773	1.05824	0.0128409	0.185729	1.20846	2.31091	16580.2	7174.73	15172.7	10486.4	16246.9	30598.9	11139.8	15836.3	6487.05	11292.8	5097.76	7422.74	5504.09	7243.9
2.85_324.2168m/z	324.217	2.84597	pos	Latanoprost Lactol	63040	Unclassified	Unclassified	Unclassified			39.2	0	M+NH4	C18H26O4	-0.34705	1.05189	0.00181888	0.077346	0.153825	1.11252	74104.5	66609.9	69165.9	72448.3	75284.2	77008	75428.7	75291.9	71130	64955	63506.3	63636.3	66160.1	70271.5
10.99_530.3237m/z	530.324	10.9855	pos	LysoPE(22:4(7Z,10Z,13Z,16Z)/0:0)	HMDB0011523	Lipids and lipid-like molecules	Glycerophospholipids	Glycerophosphoethanolamines	***		52.7	69.9	M+H	C27H48NO7P	-0.848712	1.04442	0.0479134	0.314245	0.278494	1.21293	59520.3	49071.6	74128.8	60889.9	49144.3	56166.4	55399.6	61393.1	54045	56839.2	44155.9	41414.4	41160.3	56814.9
0.69_188.1757m/z	188.176	0.688833	pos	3-Acrylamidopropyl trimethylammonium	34500	Unclassified	Unclassified	Unclassified			39.2	0	M+NH4	C9H18N2O	-0.249348	1.04137	0.000380405	0.0384515	1.12284	2.17775	12784.7	5870.62	14080.9	15336.8	12669.2	11098.7	8233.73	15289.1	2877.28	5716.16	6307.08	5853.57	6410.1	8059.56
0.82_277.0321m/z	277.032	0.824433	pos	6-Phosphogluconic acid	367	Organic oxygen compounds	Organooxygen compounds	Carbohydrates and carbohydrate conjugates	**	C00345	40.1	4.65	M+H	C6H13O10P	0.561815	1.03896	0.0191107	0.215269	2.3707	5.17192	11476.3	2218.96	22650	3252.92	16512.3	12645	5972.95	7824.54	0.000228787	1421.73	546.753	571.531	1129.5	9644.24
7.06_432.3012m/z	432.301	7.06385	pos	P,P-Dioctyldiphenylamine	HMDB0061926	Benzenoids	Benzene and substituted derivatives	Aniline and substituted anilines			36.1	0.364	M+K	C28H43N	-3.87159	1.02551	0.000988125	0.0610661	2.02902	4.08127	9450	2315.46	4905.43	8176.94	7846.22	8243.15	12130	15398.3	1666.53	2476.16	1848.13	3915.99	2119.11	1866.83
7.42_624.3390m/z	624.339	7.41632	neg	(3a,5b,7b)-24-[(carboxymethyl)amino]-7-hydroxy-24-oxocholan-3-yl-b-D-glucopyranosiduronic acid,	6724	Unclassified	Unclassified	Unclassified			39.4	0	M-H	C32H51NO11	0.0249589	1.02126	0.0156742	0.200603	4.33269	20.1498	8478.77	420.787	2489.8	14273.6	10643.7	2597.87	2981.43	17886.1	0.000228787	2060.63	113.166	77.1988	124.531	149.191
7.11_777.6932m/z	777.693	7.11048	pos	Thyroxine	HMDB0000248	Organic acids and derivatives	Carboxylic acids and derivatives	Amino acids, peptides, and analogues	**	C01829	39.2	0	M+H	C15H11I4NO4	-0.966978	1.01758	0.00222472	0.0847265	-0.936268	0.522583	8220.16	15729.9	6593.75	10597.2	7674.27	6984.99	10783.5	6687.2	8995.32	21547.1	15786	14609.5	16317.5	17123.8
13.30_522.5967m/z	522.597	13.2972	pos	Tridodecylamine	HMDB0037822	Organic nitrogen compounds	Organonitrogen compounds	Amines			36.5	0.144	M+H	C36H75N	-1.04351	1.01077	0.00428206	0.115285	-0.165181	0.891816	59393.8	66598.7	66600.1	57462.1	62817.8	58630.2	55756.4	55096.4	67365.5	67769.8	68466.1	66945.5	63668.5	65377
10.52_262.2293n	280.263	10.5215	pos	2-(5,8-Tetradecadienyl)cyclobutanone	HMDB0037519	Organic oxygen compounds	Organooxygen compounds	Carbonyl compounds			46.5	38.1	M+H, M+NH4	C18H30O	-1.27691	1.00392	0.0457262	0.308167	-0.819478	0.566647	16143.9	28490.2	15086.8	18306.9	14535.5	14774.8	20058.3	14101	30883.3	24248.9	14809.8	20028.4	28672.5	52298.5
7.42_510.2529m/z	510.253	7.41632	neg	glycochenodeoxycholic acid 7-sulfate	LMST05030005	Lipids and lipid-like molecules	Steroids and steroid derivatives	Bile acids, alcohols and derivatives	*	C15559	38	0	M-H2O-H	C26H43NO8S	-0.404561	1.00329	0.0069394	0.143364	2.20364	4.60641	10313.8	2239.01	6041.71	20482.6	11171.7	11389.1	7075.77	5722	183.99	2860	4022.06	557.192	4328.86	1481.97

## Sheet: Metabolomics colonic mucosa
ID	m/z	Retention time (min)	Ion mode	Metabolites	Compound ID	Super Class	Class	Sub Class	level	kegg	Score	Fragmentation Score	Adducts	Formula	Mass Error (ppm)	VIP	P-value	adj.P-value	log2(FC)	FC	average(Z)	average(B)	Z7	Z8	Z9	Z10	Z11	Z12	B1	B2	B3	B4	B5	B6
13.42_426.3496n	427.357	13.4233	pos	4α-formyl-4β-methyl-5α-cholesta-8,24-dien-3β-ol	HMDB0062387	Lipids and lipid-like molecules	Prenol lipids	Triterpenoids	*		51.6	61.1	M+H-H2O, M+H	C29H46O2	-0.428157	22.8291	8.11666e-05	0.00957228	1.77448	3.42115	6.03543e+06	1.76416e+06	8.19098e+06	5.8433e+06	5.99491e+06	4.0658e+06	5.10063e+06	7.01699e+06	1.68296e+06	2.56094e+06	2.61918e+06	1.94434e+06	1.15297e+06	624543
11.40_470.3390n	471.346	11.4027	pos	Glycyrrhetinic acid	HMDB0011628	Lipids and lipid-like molecules	Prenol lipids	Triterpenoids	*	C02283	52.7	66.3	M+H, M+Na	C30H46O4	-1.21401	21.8515	0.0212985	0.16104	7.16715	143.723	5.09271e+06	35434.2	2.98455e+06	3.39618e+06	1.46558e+06	3.03609e+06	1.39262e+07	5.74767e+06	17864.2	39633.5	38966.7	22186.5	49519.1	44435.1
11.69_298.2505n	299.258	11.6853	pos	13-HpOME(14E)	LMFA02000098	Lipids and lipid-like molecules	Fatty Acyls	Octadecanoids			54.9	78	M+H, M+Na	C18H34O3	-1.04506	21.7231	0.0123165	0.121105	1.211	2.31498	8.64452e+06	3.73417e+06	5.90574e+06	9.02798e+06	5.35925e+06	1.33293e+07	5.5282e+06	1.27167e+07	5.6015e+06	2.76484e+06	5.65772e+06	2.30596e+06	3.25791e+06	2.81711e+06
10.66_453.2851n	454.292	10.6566	pos	PE(16:0/0:0)	40776	Lipids and lipid-like molecules	Glycerophospholipids	Glycerophosphoethanolamines	*		56.7	85.4	M+H, M+Na, M+H-H2O	C21H44NO7P	-1.06695	20.6404	0.0117814	0.118454	-1.96841	0.255535	1.49419e+06	5.84728e+06	1.68305e+06	838133	1.69174e+06	1.93287e+06	2.20049e+06	618824	3.88916e+06	9.555e+06	2.17401e+06	2.45107e+06	9.3673e+06	7.64713e+06
10.67_453.2853n	452.278	10.6676	neg	1-(2-methoxy-6Z-pentadecenyl)-sn-glycero-3-phosphoethanolamine	LMGP02060012	Lipids and lipid-like molecules	Glycerophospholipids	Glycerophosphoethanolamines			45.6	29.6	M-H, 2M-H	C21H44NO7P	-0.533594	15.4208	0.015704	0.137163	-1.96278	0.256534	864040	3.36813e+06	915078	515417	917639	1.24471e+06	1.23991e+06	351493	2.16232e+06	5.56508e+06	1.13977e+06	1.3126e+06	5.61689e+06	4.41213e+06
4.09_207.0533n	208.061	4.0912	pos	1-Nitro-5,6-dihydroxy-dihydronaphthalene	70333	Benzenoids	Naphthalenes	Nitronaphthalenes	**	C14801	46.5	34.6	M+H, M+Na, M+K, M+H-H2O	C10H9NO4	0.912508	12.6725	0.0426923	0.225771	-3.8864	0.0676205	142321	2.1047e+06	110514	68411.7	47080.4	83180.6	391713	153026	140245	5.76008e+06	165203	1.99379e+06	2.67358e+06	1.89532e+06
11.69_471.3463m/z	471.346	11.6853	pos	Glyyunnansapogenin B	HMDB0036639	Lipids and lipid-like molecules	Prenol lipids	Triterpenoids	*		56.1	83.3	M+H-H2O	C30H48O5	-1.23568	12.2372	0.00614655	0.0838184	4.84874	28.8148	1.45467e+06	50483.4	952490	1.27655e+06	571358	823625	3.28501e+06	1.81899e+06	42193.8	40682.2	42240.6	24289.6	84468.1	69026.1
10.90_442.3443n	443.352	10.8997	pos	4-Methylzymosterol intermediate 1	HMDB0060146	Lipids and lipid-like molecules	Prenol lipids	Triterpenoids	*		47.9	45.2	M+H-H2O, M+H	C29H46O3	-0.96606	11.2402	0.00179327	0.0433174	1.64323	3.12363	1.72479e+06	552175	2.52228e+06	1.20438e+06	994544	1.49096e+06	2.29068e+06	1.84592e+06	215381	710953	1.04218e+06	234503	643027	467002
9.84_425.2542n	424.247	9.83728	neg	LysoPE(14:0/0:0)	HMDB0011500	Lipids and lipid-like molecules	Glycerophospholipids	Glycerophosphoethanolamines	*		44.4	23.6	M-H, 2M-H	C19H40NO7P	-0.157062	11.1571	0.00019014	0.0144014	-2.98368	0.126422	147952	1.17031e+06	174347	151582	211395	116589	169979	63821.5	1.34269e+06	1.13077e+06	565491	905054	1.85699e+06	1.22083e+06
9.83_425.2537n	426.261	9.82708	pos	PE(14:0/0:0)	40777	Lipids and lipid-like molecules	Glycerophospholipids	Glycerophosphoethanolamines			53.3	71.7	M+H, M+Na, M+H-H2O	C19H40NO7P	-1.21794	11.0222	0.000321924	0.019093	-3.2451	0.10547	119147	1.12968e+06	138540	117400	147720	96582.3	171076	43562.1	1.2072e+06	983563	663840	791107	1.96536e+06	1.16701e+06
14.16_426.3497n	427.357	14.1617	pos	Stigmast-22-ene-3,6-dione	88045	Lipids and lipid-like molecules	Steroids and steroid derivatives	Stigmastanes and derivatives	*		43	19.9	M+H-H2O, M+H	C29H46O2	-0.228146	10.0454	2.07539e-05	0.00485872	2.54088	5.81946	952091	163605	1.11516e+06	1.07594e+06	1.12173e+06	518408	788151	1.09315e+06	96868.6	301864	127173	164117	167628	123978
13.70_410.3545n	411.362	13.7038	pos	Delta 8,14 -Sterol	HMDB0006928	Lipids and lipid-like molecules	Sterol Lipids	Sterols	**	C11508	49	51.2	M+H-H2O, M+H	C29H46O	-0.978416	10.0419	0.000295997	0.0181356	1.36508	2.5759	1.34514e+06	522200	870820	1.61042e+06	1.54224e+06	1.68887e+06	1.10079e+06	1.25769e+06	571431	421976	702094	765570	349911	322219
10.88_479.3009n	480.308	10.8775	pos	PE(18:1(9Z)/0:0)	40778	Lipids and lipid-like molecules	Glycerophospholipids	Glycerophosphoethanolamines			57	88.5	M+H, M+Na	C23H46NO7P	-0.704102	10.0335	0.042496	0.225448	-1.74417	0.298506	516556	1.73047e+06	491437	361811	651640	497393	749551	347505	809980	3.00877e+06	440542	500932	2.9943e+06	2.62831e+06
11.56_442.3442n	425.341	11.5563	pos	(24E)-5alpha,8alpha-epidioxy-24-ethyl-cholesta-6,24(28)-dien-3beta-ol	84130	Lipids and lipid-like molecules	Sterol Lipids	Sterols			39	0	M+H-H2O, M+H	C29H46O3	-1.18784	9.97426	7.97049e-05	0.00954409	1.44494	2.72251	1.27565e+06	468557	1.58231e+06	1.1698e+06	823829	1.24593e+06	1.42331e+06	1.40873e+06	402459	564794	752642	358752	398528	334167
11.69_281.2472m/z	281.247	11.6853	pos	13S-HOME(11E)	LMFA02000094	Lipids and lipid-like molecules	Fatty Acyls	Octadecanoids			55.2	80.1	M+H-H2O	C18H34O3	-0.985073	9.85697	0.0141711	0.129911	1.3332	2.51961	1.70725e+06	677584	1.22884e+06	1.70597e+06	945115	2.72202e+06	1.04417e+06	2.59736e+06	1.16782e+06	464473	1.03043e+06	429921	520303	452555
11.05_467.3009n	468.308	11.0524	pos	PE(17:0/0:0)	77696	Lipids and lipid-like molecules	Glycerophospholipids	Glycerophosphoethanolamines	*		55.3	78.3	M+H, M+Na	C22H46NO7P	-0.687952	9.54472	0.00193305	0.0449662	-1.80291	0.286596	324896	1.13364e+06	420278	161498	390119	491763	347356	138361	913714	1.54505e+06	695242	584898	1.54617e+06	1.51675e+06
10.09_408.2518m/z	408.252	10.0864	neg	Talinolol	HMDB0042020	Benzenoids	Benzene and substituted derivatives	N-phenylureas			38.1	0	M+FA-H	C20H33N3O3	3.88191	9.01062	0.00262131	0.0532866	-3.22375	0.107042	89192.1	833241	96705.6	113498	162939	46690.6	71439.7	43879.3	942825	511825	389140	553358	1.62673e+06	975565
10.08_410.2663m/z	410.266	10.0755	pos	CPA(16:0)	LMGP00000057	Lipids and lipid-like molecules	Glycerophospholipids	Glycerophosphates	*		47.2	40.2	M+NH4	C19H37O6P	-0.701218	8.9534	0.00129315	0.0369958	-3.1246	0.114657	91439.5	797502	106637	104560	150468	49485.7	93024.2	44462.3	865039	545405	442978	505022	1.47059e+06	955980
12.16_483.2725m/z	483.273	12.1642	neg	LysoPA(0:0/18:0)	HMDB0007850	Lipids and lipid-like molecules	Glycerophospholipids	Glycerophosphates	*		45	26.7	M+FA-H	C21H43O7P	-0.710564	8.80723	0.0285683	0.186422	-1.17874	0.441738	682558	1.54517e+06	890561	409297	818497	671533	997746	307715	1.07863e+06	2.10028e+06	806733	864803	2.76783e+06	1.65272e+06
10.96_478.2936m/z	478.294	10.9558	neg	LysoPE(18:1(9Z)/0:0)	HMDB0011506	Lipids and lipid-like molecules	Glycerophospholipids	Glycerophosphoethanolamines	*		42.9	20	M-H	C23H46NO7P	-0.718234	7.73461	0.0393478	0.218225	-1.87021	0.273533	268650	982149	244266	191300	369690	223939	399231	183475	443354	1.61254e+06	246108	267445	1.74669e+06	1.57675e+06
11.07_466.2935m/z	466.294	11.0661	neg	1-(2-methoxy-6Z-hexadecenyl)-sn-glycero-3-phosphoethanolamine	LMGP02060017	Lipids and lipid-like molecules	Glycerophospholipids	Glycerophosphoethanolamines			42.7	15.9	M-H	C22H46NO7P	-0.837927	7.47658	0.0012644	0.0363782	-1.97927	0.253618	165713	653395	207976	85365.5	224529	234092	173657	68658.6	526089	900102	379155	362755	854631	897639
7.56_408.2874n	453.286	7.55612	neg	3a,7b,12b-Trihydroxy-5b-cholanoic acid	HMDB0000390	Lipids and lipid-like molecules	Steroids and steroid derivatives	Bile acids, alcohols and derivatives	*		43.1	17.5	M+FA-H, 2M-H, M-H	C24H40O5	-0.36987	7.23886	0.0384659	0.215955	-1.16379	0.446338	490496	1.09894e+06	417588	248661	289437	967219	733522	286551	1.07969e+06	1.09501e+06	2.0676e+06	1.14835e+06	390795	812160
11.56_426.3494n	427.357	11.5563	pos	24-vinyloxy-cholest-5,23Z-dien-3beta-ol	LMST01010285	Unclassified	Unclassified	Unclassified			52.8	68.2	M+H-H2O, M+H	C29H46O2	-0.939606	6.9969	0.00560248	0.0795724	0.890554	1.85389	1.03299e+06	557203	776231	1.00694e+06	1.05853e+06	1.33671e+06	1.19898e+06	820562	711631	410963	995481	465889	447991	311260
10.36_422.2675m/z	422.268	10.3645	neg	1-(2-methoxy-tetradecanyl)-sn-glycero-3-phosphoethanolamine	LMGP02060009	Lipids and lipid-like molecules	Glycerophospholipids	Glycerophosphoethanolamines			47.4	40.9	M-H2O-H	C20H44NO7P	-0.388515	6.62406	0.00232948	0.0496838	-2.23486	0.212442	106988	503611	187118	81223.4	134065	85547.2	91251.9	62723.8	576227	362128	246066	335188	883392	618665
11.79_468.3238n	469.331	11.7947	pos	Isoglabrolide	91091	Lipids and lipid-like molecules	Prenol lipids	Sesquiterpenoids	*		45.5	34	M+H, M+NH4	C30H44O4	-0.444972	6.594	0.00560735	0.0795724	4.74566	26.8279	423915	15801.3	275986	333649	163290	251727	920764	598072	8086.98	25784.1	13314.9	18437.4	16068.5	13115.7
11.39_470.3390n	469.332	11.3901	neg	(3alpha,20R,24Z)-3-Hydroxy-21-oxoeupha-8,24-dien-26-oic acid	HMDB0033213	Lipids and lipid-like molecules	Fatty Acyls	Fatty alcohol esters	*		45.8	32.2	M-H, M+FA-H, 2M-H	C30H46O4	-1.337	6.50925	0.0370496	0.212124	6.90147	119.55	487435	4077.25	298524	285776	99726.7	260730	1.45336e+06	526493	3332.5	2948.95	5703.57	2601.22	5363.84	4513.41
11.71_366.3727m/z	366.373	11.7071	pos	Behenoyl-EA	LMFA08040052	Lipids and lipid-like molecules	Fatty Acyls	Fatty amides			42.6	18.5	M+H-H2O	C24H49NO2	-0.941034	6.45336	0.0345382	0.204352	-0.392911	0.761591	1.46868e+06	1.92843e+06	1.55768e+06	1.03827e+06	1.7857e+06	1.65282e+06	1.24748e+06	1.53012e+06	1.67792e+06	2.14005e+06	1.35766e+06	1.87209e+06	2.15662e+06	2.36627e+06
12.37_426.3494n	409.346	12.3748	pos	4alpha-formyl-4beta-methyl-5alpha-cholesta-8,24-dien-3beta-ol	LMST01010229	Lipids and lipid-like molecules	Prenol lipids	Triterpenoids	*		47.8	45	M+H-H2O, M+H	C29H46O2	-0.90374	6.18054	0.000714941	0.0277866	1.04913	2.06928	654852	316464	532490	590207	730547	899089	516434	660343	261007	235030	483526	354653	323901	240666
12.16_484.2799n	507.269	12.1601	pos	PG(16:0/0:0)[U]	40874	Unclassified	Unclassified	Unclassified			56.7	86.6	M+H, M+Na, M+H-H2O	C22H45O9P	-0.481331	5.84616	0.0216293	0.162461	-1.07291	0.475359	331435	697232	404206	207006	421011	324102	474379	157908	516207	990677	420108	431382	1.14151e+06	683513
10.26_506.2496m/z	506.25	10.2603	neg	STROPHANTHIDIN SEMICARBAZIDE	44254	Unclassified	Unclassified	Unclassified			38.2	0	M+FA-H	C24H35N3O6	-2.58633	5.83267	0.000135462	0.0122972	-1.63397	0.3222	129961	403356	142172	81841.1	173496	159448	150187	72622.5	354003	542359	274028	323351	492408	433984
10.49_422.2675m/z	422.268	10.4942	neg	Boc-Pro-DVal(NMe)-Val-OMe	65474	Unclassified	Unclassified	Unclassified			38.2	0	M-H2O-H	C22H39N3O6	3.35879	5.81899	0.000930379	0.0315789	-2.03377	0.244217	93761.5	383928	166068	64964.5	148465	68887.6	62721.2	51462.8	345840	275528	274168	275795	596726	535509
13.27_181.0143m/z	181.014	13.2744	pos	3-(but-3-en-1-yn-1-yl)-6-methyl-1,2-dithiine	LMFA12000365	Lipids and lipid-like molecules	Fatty Acyls	Oxygenated hydrocarbons			36.6	2.76	M+H	C9H8S2	1.52974	5.79359	0.00185476	0.0442503	-0.255372	0.837771	1.57375e+06	1.8785e+06	1.59882e+06	1.61337e+06	1.52683e+06	1.61644e+06	1.47983e+06	1.60721e+06	1.89972e+06	1.93508e+06	1.64914e+06	1.70253e+06	2.01396e+06	2.07054e+06
4.10_229.0350n	274.033	4.10337	neg	5-phospho-beta-D-ribosylaminium(1-)	HMDB0062576	Organic oxygen compounds	Organooxygen compounds	Carbohydrates and carbohydrate conjugates			40.9	12.4	M+FA-H, 2M-H, M-H	C5H12NO7P	-0.557031	5.60327	0.0155332	0.136191	-3.85642	0.06904	25017.3	362360	13873.1	15578.4	11433.6	20241.9	68425.1	20551.8	27756	742330	36403	369660	515208	482803
12.82_411.3617m/z	411.362	12.8211	pos	Mangiferdesmethylursanone	HMDB0036018	Organic oxygen compounds	Organooxygen compounds	Alcohols and polyols			48.9	52.1	M+H-H2O	C29H48O2	-0.93788	5.50504	2.15615e-05	0.0048967	1.89862	3.72857	332209	89098.3	418442	311823	410969	323890	233287	294846	114902	61178.1	135453	111738	65627.5	45691.1
12.80_356.2710n	357.278	12.7987	pos	4,8,12,15,19,21-tetracosahexaenoic acid	LMFA01030186	Lipids and lipid-like molecules	Fatty Acyls	Fatty Acids and Conjugates			44.8	31.6	M+H, M+NH4, M+H-H2O	C24H36O2	-1.39337	5.35473	0.0444792	0.230137	-1.12418	0.458762	293571	639921	201313	347370	182238	390294	405410	234804	464084	756924	1.26913e+06	661006	436593	251792
11.77_344.3156m/z	344.316	11.7728	pos	Dihydroceramide C2	43402	Unclassified	Unclassified	Unclassified			51.8	64.1	M+H	C20H41NO3	-0.948424	5.28526	0.000277158	0.0178236	2.15181	4.44384	312455	70311.9	466896	169831	344039	280765	376841	236360	99313.5	100619	64911.2	59183.1	54286.9	43557.4
10.51_453.2853n	452.278	10.5078	neg	1-(2-methoxy-13-methyl-6Z-tetradecenyl)-sn-glycero-3-phosphoethanolamine	LMGP02060010	Lipids and lipid-like molecules	Glycerophospholipids	Glycerophosphoethanolamines			41.8	10.4	M-H, 2M-H	C21H44NO7P	-0.451714	5.26913	0.0193866	0.153592	-1.39902	0.379187	182096	480226	214418	116424	240788	229104	208024	83816.8	366789	944518	218081	327962	532515	491491
11.69_253.2523m/z	253.252	11.6853	pos	Margaric acid	LMFA01010017	Lipids and lipid-like molecules	Fatty Acyls	Fatty acids and conjugates	*		48.2	45.7	M+H-H2O	C17H34O2	-1.19366	5.1677	0.0111859	0.115468	1.23408	2.35231	477748	203097	318867	510325	300747	730161	299769	706620	293774	149841	302693	123139	191386	157750
2.14_148.0525n	166.086	2.14347	pos	trans-Cinnamic acid	HMDB0000930	Phenylpropanoids and polyketides	Cinnamic acids and derivatives	Cinnamic acids	*	C10438	41.3	16.3	M+H-H2O, M+NH4	C9H8O2	0.464854	5.15344	0.0258637	0.177551	0.513918	1.42792	926775	649037	753811	1.19994e+06	970789	849688	935183	851236	499169	974125	386278	632220	794952	607478
13.32_184.9855m/z	184.985	13.3187	pos	Phosphohydroxypyruvic acid	HMDB0001024	Organic oxygen compounds	Organooxygen compounds	Carbonyl compounds	**	C03232	39.3	5.62	M+H	C3H5O7P	4.90722	5.06158	0.00966151	0.107333	-0.160891	0.894472	2.24248e+06	2.50705e+06	2.19591e+06	2.3126e+06	2.26901e+06	2.22402e+06	2.13071e+06	2.32265e+06	2.51183e+06	2.62261e+06	2.23443e+06	2.33107e+06	2.61277e+06	2.72957e+06
13.86_409.3464m/z	409.346	13.8557	pos	Momordenol	HMDB0031080	Lipids and lipid-like molecules	Steroids and steroid derivatives	Ergostane steroids	*		50.6	57.6	M+H-H2O	C29H46O2	-0.111023	5.03191	0.00021189	0.0149249	1.5958	3.02261	306325	101345	208650	363332	309031	394548	223096	339295	174362	48113.8	107571	131720	81767.1	64534
10.94_480.3442m/z	480.344	10.9434	pos	PC(O-16:1(11Z)/0:0)	LMGP01060028	Lipids and lipid-like molecules	Glycerophospholipids	Glycerophosphocholines			43.4	23	M+H	C24H50NO6P	-1.37876	4.98235	0.017165	0.144252	1.45503	2.74162	463439	169039	654408	279414	844843	338955	227256	435760	166444	78944.4	223739	133632	296728	114743
14.01_425.3410m/z	425.341	14.0079	pos	15-ketocholestane	LMST01010270	Lipids and lipid-like molecules	Sterol Lipids	Sterols			48.2	51	M+Na	C27H46O2	4.96539	4.96214	2.81346e-05	0.00566318	2.90526	7.49155	225744	30133.2	290080	235456	244263	135974	157288	291407	40139.4	30196.4	22614.3	27599.8	38618.4	21630.9
12.46_392.3286n	393.336	12.4558	pos	3-Methyl-5-pentyl-2-furanpentadecanoic acid	HMDB0112082	Lipids and lipid-like molecules	Fatty Acyls	Fatty acids and conjugates			40	8.13	M+H-H2O, M+H	C25H44O3	-1.0837	4.68648	0.0226576	0.166152	-1.28502	0.410364	161386	393276	122484	126704	256817	77581.6	69846.5	314885	502915	199042	680660	410348	370440	196251
3.94_289.0784n	334.077	3.94247	neg	N-Succinyl-2-amino-6-oxopimelate	66320	Unclassified	Unclassified	Unclassified			38	0	M-H, M+FA-H	C11H15NO8	-4.89429	4.68463	0.000401641	0.0207812	5.75272	53.9191	200882	3725.62	323668	60259.8	282536	178011	169370	191447	5996.24	1715.81	4680.27	4218.17	3272.85	2470.4
10.28_482.2521m/z	482.252	10.2756	neg	1-(2-methoxy-6Z-tetradecenyl)-sn-glycero-3-phosphoserine	LMGP03060005	Lipids and lipid-like molecules	Glycerophospholipids	Glycerophosphoserines			44.5	25.9	M-H	C21H42NO9P	-0.620374	4.67318	0.0077776	0.0959405	-1.69714	0.308396	97202.6	315188	91854.4	115180	133059	87600.9	100561	54960.3	223932	559531	142422	185897	401769	377576
10.26_483.2592n	484.267	10.2554	pos	PS(15:0/0:0)	LMGP03050031	Lipids and lipid-like molecules	Glycerophospholipids	Glycerophosphoserines			45.1	28.2	M+H, M+Na	C21H42NO9P	-0.997701	4.6492	0.0100134	0.108908	-1.78711	0.289751	89268.3	308086	91515	88650.6	134223	72432.5	108321	40467.6	224517	575112	150566	148775	392850	356698
11.51_441.3358m/z	441.336	11.5121	pos	Camelledionol	HMDB0035730	Lipids and lipid-like molecules	Prenol lipids	Triterpenoids	*		53.5	74.5	M+H	C29H44O3	-1.16004	4.61976	0.00268269	0.0542454	1.34529	2.54082	332945	131039	459717	280154	197808	281191	342601	436200	54568.8	107380	152510	52060.2	240443	179271
11.69_396.2039m/z	396.204	11.6853	pos	Gibberellin A52	HMDB0035053	Lipids and lipid-like molecules	Prenol lipids	Diterpenoids	*		37.8	0	M+NH4	C20H26O7	5.7904	4.61942	0.00879212	0.102355	1.03952	2.05554	418678	203683	325670	437484	280892	581398	293417	593209	319199	148976	289290	145171	166945	152518
4.18_342.1794n	325.176	4.1793	pos	7-(4-Hydroxy-3-methoxyphenyl)-5-methoxy-1-phenyl-3-heptanone	HMDB0029525	Phenylpropanoids and polyketides	Diarylheptanoids	Linear diarylheptanoids			36.1	0	M+H-H2O, M+NH4	C21H26O4	-10.9811	4.61679	0.000122683	0.0118653	1.78179	3.43851	251600	73171	346455	209752	264957	262113	188807	237514	115902	52095.4	105029	121747	24390.2	19862.3
11.11_469.2568m/z	469.257	11.1104	neg	PA(17:0/0:0)	LMGP10050036	Lipids and lipid-like molecules	Glycerophospholipids	Glycerophosphates	*		43.7	20.8	M+FA-H	C20H41O7P	-1.00029	4.54228	0.0298001	0.18971	-0.895039	0.537733	266423	495457	383662	166464	294346	223275	392467	138324	350992	667627	324625	376148	797765	455582
12.16_441.3361m/z	441.336	12.1601	pos	Pfaffic acid	LMPR0106250001	Lipids and lipid-like molecules	Prenol lipids	Isoprenoids			53.9	73.4	M+H	C29H44O3	-0.409021	4.47259	1.23122e-06	0.00119078	1.61008	3.05269	228277	74779.2	240704	209275	229542	222022	192134	275987	74472.5	68767.2	109636	87069.8	66845.2	41884.3
3.59_294.0408m/z	294.041	3.5855	pos	Menadione sodium bisulfite	72190	Benzenoids	Naphthalenes	Naphthoquinones	**	C05377	39.2	0	M+NH4	C11H9NaO5S	0.490617	4.41182	0.000625624	0.0260463	12.2594	4902.9	174668	35.6255	303521	120737	268996	117162	109122	128471	32.0957	9.98247	40.735	68.0337	26.4455	36.4609
11.12_408.3385n	409.346	11.1187	pos	Conicasterol B	LMST01031085	Lipids and lipid-like molecules	Sterol Lipids	Sterols			41.3	11.7	M+H-H2O, M+H	C29H44O	-1.82206	4.36934	0.00110604	0.0340667	2.32856	5.02303	220304	43858.7	396410	142511	210866	140597	200191	231247	30298.3	45616.7	73840.1	31254.3	55146.6	26996.2
9.84_492.2343m/z	492.234	9.83728	neg	Boc-Pro-Phe(NMe)-Gly-OMe	65473	Unclassified	Unclassified	Unclassified			38.3	0	M+FA-H	C23H33N3O6	-1.9542	4.36461	0.00020628	0.0148086	-3.17645	0.11061	19519.2	176469	22975.3	19648	28977	16376.4	21733.6	7404.99	202380	169503	79187.9	138776	281265	187701
3.94_289.0787n	312.068	3.93823	pos	N-Succinyl-2-amino-6-ketopimelate	62901	Organic acids and derivatives	Carboxylic acids and derivatives	Amino acids, peptides, and analogues	**	C04462	40.3	8.86	M+H, M+NH4, M+Na, M+H-H2O	C11H15NO8	-3.63808	4.35435	0.00243705	0.051325	5.67542	51.1061	190479	3727.13	389730	52577	221207	197624	134388	147350	4198.38	2661.72	5494.53	5494.38	1541.39	2972.39
5.32_397.0900m/z	397.09	5.32362	neg	Trovafloxacin	HMDB0014823	Organoheterocyclic compounds	Diazanaphthalenes	Naphthyridines		C07664	46	40.4	M-H2O-H	C20H15F3N4O3	-4.22291	4.30068	0.0182713	0.149124	-1.33685	0.395884	134580	339948	139101	150844	135127	126652	119771	135984	566368	301136	135095	531138	332095	173859
6.39_467.2317m/z	467.232	6.39228	neg	2-Methylacetophenone	HMDB0032386	Organic oxygen compounds	Organooxygen compounds	Carbonyl compounds	*		42.8	22.4	M+FA-H	C20H38O7S	-0.806422	4.26135	0.000510125	0.0235369	2.37174	5.17564	180494	34873.7	64455.1	251457	167879	155774	244189	199208	55897.2	27028.8	26368.5	51890.1	36511.4	11546.2
13.25_183.0098m/z	183.01	13.2523	pos	Thiacremonone	HMDB0035901	Organic oxygen compounds	Organooxygen compounds	Carbonyl compounds			37.5	0	M+Na	C6H8O3S	7.29542	4.2355	0.00150693	0.0398456	-0.266513	0.831326	790817	951272	807886	803204	776584	808615	738020	810595	966146	978816	829027	866755	1.01581e+06	1.05108e+06
11.14_505.3530n	506.36	11.1403	pos	PC(P-18:1(9Z)/0:0)	LMGP01070012	Lipids and lipid-like molecules	Glycerophospholipids	Glycerophosphocholines	**	C04230	43.9	24.7	M+H, M+Na	C26H52NO6P	-0.485076	4.21779	0.0170453	0.143881	1.24058	2.36294	361137	152834	570531	262459	584762	203248	246026	299797	146881	110099	218267	103512	218311	119931
11.51_444.3238n	467.313	11.5121	pos	1-a,24R,25-Trihydroxyvitamin D2	HMDB0006227	Lipids and lipid-like molecules	Steroids and steroid derivatives	Vitamin D and derivatives	*		44.7	28.1	M+H-H2O, M+Na	C28H44O4	-0.384125	4.07247	0.0210647	0.16025	0.936114	1.91337	385583	201520	437681	338628	296941	533693	494663	211890	211243	353129	300506	164552	84787.8	94906.2
12.82_299.2589m/z	299.259	12.8186	neg	DL-2-hydroxy stearic acid	35432	Lipids and lipid-like molecules	Fatty Acyls	Octadecanoids			48.9	48.7	M-H	C18H36O3	-0.881205	4.02422	0.0248056	0.173219	0.706103	1.63139	442754	271396	324434	641149	465225	389367	269355	566992	330639	196419	312459	215836	215894	357133
7.53_379.2952m/z	379.295	7.52758	pos	N-arachidonoyl glycine	LMFA08020003	Organic acids and derivatives	Carboxylic acids and derivatives	Amino acids, peptides, and analogues			51.4	62.5	M+NH4	C22H35NO3	-1.00663	4.008	0.0233837	0.168793	-2.29055	0.204398	45803.7	224091	36003.2	36454.1	43605.6	51039.2	68321.7	39398.6	108169	506703	99833.7	85158.7	275833	268850
1.15_164.0474n	182.081	1.15357	pos	2-Hydroxycinnamic acid	HMDB0002641	Phenylpropanoids and polyketides	Cinnamic acids and derivatives	Hydroxycinnamic acids and derivatives	**	C01772	52.9	63.9	M+H, M+NH4, M+H-H2O	C9H8O3	0.3096	3.96124	0.00777561	0.0959405	0.557079	1.47129	454226	308727	390597	585765	465257	427145	440650	415942	260708	450221	204833	311371	331054	294177
12.09_426.3497n	409.346	12.0941	pos	7-Oxostigmasterol	HMDB0030015	Lipids and lipid-like molecules	Steroids and steroid derivatives	Stigmastanes and derivatives	*		46.3	36.5	M+H-H2O, M+H	C29H46O2	-0.294743	3.93892	0.000559543	0.0249031	1.83071	3.55713	192246	54045.4	265136	155528	266679	113916	140135	212084	33051.2	86284	62693	45043.9	44613.1	52587.4
5.91_431.1717m/z	431.172	5.905	neg	Isogingerenone B	HMDB0035404	Phenylpropanoids and polyketides	Diarylheptanoids	Linear diarylheptanoids			41.1	13.4	M+FA-H	C22H26O6	1.38568	3.89452	0.0014923	0.0397103	1.41429	2.66528	203889	76498	91269.4	268533	208524	167670	258543	228794	121695	82687.9	58128.9	89051.9	70505.3	36919.3
15.41_423.3256m/z	423.326	15.4104	pos	3beta-Hydroxy-5-cholestenal	HMDB0060131	Lipids and lipid-like molecules	Steroids and steroid derivatives	Bile acids, alcohols and derivatives	*		36.2	0	M+Na	C27H44O2	5.52158	3.88113	0.0187656	0.15105	0.814918	1.7592	367458	208878	249114	439844	367622	487895	306513	353763	343430	180922	262615	283428	133858	49017.4
11.69_343.2214m/z	343.221	11.6853	pos	5-HETE	HMDB0011134	Lipids and lipid-like molecules	Fatty Acyls	Eicosanoids	**	C04805	37.2	0	M+Na	C20H32O3	-9.30496	3.86231	0.00508294	0.0757894	1.0096	2.01336	282626	140376	200091	325347	219606	379834	192854	378027	184613	111076	197340	102911	135725	110590
12.45_392.3289n	391.322	12.4455	neg	15-(3-methyl-5-pentylfuran-2-yl)-pentadecanoic acid	LMFA01150030	Lipids and lipid-like molecules	Fatty Acyls	Fatty Acids and Conjugates			39.3	0.811	M-H, M+FA-H	C25H44O3	-0.429817	3.83481	0.0141832	0.129911	-1.18575	0.439596	114973	261542	90002.3	81759.8	185271	50427.6	43886.1	238489	291726	125519	379508	262736	321137	188627
9.67_458.3392n	459.347	9.67138	pos	SMILAGENIN ACETATE	43697	Unclassified	Unclassified	Unclassified			40.5	6	M+H-H2O, M+H	C29H46O4	-0.842948	3.81788	0.0174123	0.145279	1.25448	2.38581	253380	106203	291420	343722	110090	200060	378299	196690	36801.8	248247	127687	74812.3	67698.5	81971.7
11.27_330.2999m/z	330.3	11.2728	pos	Palmitoyl Serinol	64849	Lipids and lipid-like molecules	Fatty Acyls	Fatty amides	*		53.9	74.6	M+H	C19H39NO3	-1.11777	3.80165	0.0012083	0.0356618	2.15923	4.46676	173711	38889.8	244811	75309	210547	224831	172422	114348	90747.6	27422.8	48579.6	52334.1	9930.2	4324.6
10.03_426.3493n	427.357	10.0307	pos	22S,23S-epoxy-24S-ethyl-5alpha-cholest-8(9),14(15)-dien-3beta-ol	84112	Lipids and lipid-like molecules	Sterol Lipids	Sterols			39	0	M+H-H2O, M+H	C29H46O2	-1.05431	3.7679	0.00141904	0.0389925	2.21243	4.63455	166888	36009.6	281999	155364	220523	91355.8	119541	132545	20828.1	29371.1	38892.5	17769.3	67394.3	41802.3
11.81_468.3227n	467.315	11.8102	neg	Ganoderic acid DM	HMDB0032837	Lipids and lipid-like molecules	Prenol lipids	Triterpenoids	*		39.2	6.82	M-H, M+FA-H	C30H44O4	-2.78397	3.71065	0.0120712	0.120217	2.8265	7.09352	160097	22569.4	101590	122110	53000.9	103866	349480	230533	18856.5	25750.5	10199.4	31841.8	29620.5	19147.9
10.65_311.2226m/z	311.223	10.6455	neg	(±)9-HpODE	64785	Unclassified	Unclassified	Unclassified			56.6	86.6	M-H	C18H32O4	-0.458628	3.68605	0.0122144	0.121079	1.0926	2.13258	273426	128214	152200	223129	329063	323956	170463	441746	80544.7	119569	103314	167225	168508	130121
11.99_298.2505n	297.243	11.9906	neg	5-Hexyltetrahydro-2-furanoctanoic acid	HMDB0031127	Lipids and lipid-like molecules	Fatty Acyls	Eicosanoids	*		40.3	5.37	M-H, M+FA-H, 2M-H	C18H34O3	-0.917621	3.63192	0.0449507	0.231672	1.20662	2.30796	282663	122473	191429	197574	115839	279254	400224	511659	135638	36252.1	53774.7	60237	221180	227755
10.15_450.2624m/z	450.262	10.1494	neg	PE(0:0/16:1(9Z))	LMGP02050037	Lipids and lipid-like molecules	Glycerophospholipids	Glycerophosphoethanolamines			41.4	10	M-H	C21H42NO7P	-0.566022	3.61908	0.00347621	0.0613162	-2.49128	0.177848	26429.7	148608	30052.5	14833.9	32569.4	30068.6	39234.9	11818.9	121166	234851	51492.5	71132.1	212862	200146
6.67_407.1742m/z	407.174	6.6655	neg	D-Tryptophan	HMDB0013609	Organoheterocyclic compounds	Indoles and derivatives	Indolyl carboxylic acids and derivatives		C00525	39	6.09	2M-H	C11H12N2O2	4.2436	3.58674	0.00166311	0.041737	1.49912	2.8267	166751	58991.3	72332.1	228378	152844	144683	220543	181724	69342.7	48202.9	25084.2	60146.5	95079.5	56091.9
12.01_568.3759n	591.365	12.0078	pos	33-Deoxy-33-hydroperoxyfurohyperforin	HMDB0038387	Lipids and lipid-like molecules	Prenol lipids	Monoterpenoids	*		39.3	0.541	M+H, M+Na	C35H52O6	-0.855984	3.57849	0.00091039	0.0313701	1.74047	3.34144	156078	46709.7	163853	144071	93793.8	199867	219259	115621	84710	42992.2	54496	76100.6	15574.9	6384.72
0.70_104.1074m/z	104.107	0.698233	pos	Choline	56	Organic nitrogen compounds	Organonitrogen compounds	Quaternary ammonium salts	**	C00114	51.5	66.9	M+H	C5H13NO	3.59338	3.55816	8.33663e-05	0.00957228	0.921308	1.89383	209895	110831	174316	255567	230781	179767	181776	237162	111017	110732	92278.2	97395.7	130950	122611
10.39_477.2851n	478.292	10.3895	pos	PE(0:0/18:2(9Z,12Z))	LMGP02050041	Lipids and lipid-like molecules	Glycerophospholipids	Glycerophosphoethanolamines			47	38.1	M+H, M+Na	C23H44NO7P	-0.905164	3.55695	0.037843	0.214421	-0.927967	0.525599	166535	316849	135167	121732	209660	163781	253680	115190	342001	485646	124353	166913	434186	347993
10.21_487.3413m/z	487.341	10.2107	pos	Glabric acid	HMDB0034689	Lipids and lipid-like molecules	Prenol lipids	Triterpenoids	*		55.2	78.5	M+H	C30H46O5	-0.969364	3.55162	0.022256	0.164955	4.04993	16.5634	142532	8605.25	92604.8	105454	50344.6	73372	380053	153365	4683.87	13699.2	8751.7	6290.35	9663.33	8543.02
6.67_416.1843n	415.177	6.6655	neg	Erioflorin methacrylate	67675	Unclassified	Unclassified	Unclassified			38.2	0	M-H, 2M-H	C23H28O7	1.88896	3.551	0.0120703	0.120217	0.60929	1.52551	362322	237509	309144	410538	360362	334234	371240	388411	358915	204612	231930	336614	168890	124092
6.65_394.2021n	417.191	6.6506	pos	Secoeremopetasitolide B	HMDB0041363	Lipids and lipid-like molecules	Prenol lipids	Terpene lactones	*		37.6	0	M+H-H2O, M+NH4, M+Na, M+H	C21H30O7	7.53776	3.53834	0.00195493	0.045194	1.01985	2.02771	211965	104534	149360	262948	189576	209334	234322	226248	161950	82964.9	116395	158279	67193	40420.8
10.39_476.2780m/z	476.278	10.3863	neg	PE(18:2(9Z,12Z)/0:0)	LMGP02050011	Lipids and lipid-like molecules	Glycerophospholipids	Glycerophosphoethanolamines	*		42.6	16.9	M-H	C23H44NO7P	-0.645127	3.51119	0.0330773	0.199847	-1.03017	0.489653	138377	282603	132245	96749.2	152814	131956	201473	115027	263349	318651	90085.2	165485	442629	415420
10.09_476.2393m/z	476.239	10.0864	neg	Almitrine	HMDB0015499	Benzenoids	Benzene and substituted derivatives	Diphenylmethanes			37.3	0.157	M-H	C26H29F2N7	2.74275	3.49581	0.00308004	0.057639	-3.39007	0.0953865	11928.3	125052	13494.4	15348.9	23346.7	5088.23	9471.65	4819.73	141544	71904.8	56138.1	84824.3	249023	146877
10.14_452.2768m/z	452.277	10.1427	pos	LysoPE(16:1(9Z)/0:0)	62290	Lipids and lipid-like molecules	Glycerophospholipids	Glycerophosphoethanolamines	*		55.3	79.6	M+H	C21H42NO7P	-0.802005	3.4177	0.00280926	0.0551026	-2.60852	0.163967	21091.1	128630	24558.1	11151.1	23012.5	25482.9	33550.1	8792.15	113392	213782	45735	62273.4	175015	161585
3.69_367.0615m/z	367.061	3.68837	neg	DIBENZOTHIOPHENE	44161	Unclassified	Unclassified	Unclassified			39.1	0	2M-H	C12H8S	-1.58254	3.40607	0.000449534	0.0217977	8.22743	299.71	104850	349.839	164564	38521.8	157869	76615.1	76399.1	115132	394.138	192.578	639.499	358.903	242.627	271.288
4.16_362.0950n	385.084	4.15763	pos	Piretanide	1978	Unclassified	Unclassified	Unclassified			44.4	32	M+Na, M+K, M+H	C17H18N2O5S	3.62266	3.36813	1.76406e-05	0.00444071	3.05171	8.29195	102761	12392.8	149929	93128.1	122251	79000.6	77977.3	94279.3	20409.2	7482.77	16253.1	19466.7	5776.8	4968.49
11.97_457.3671m/z	457.367	11.9652	pos	Sandosapogenol	HMDB0031882	Lipids and lipid-like molecules	Prenol lipids	Triterpenoids	*		54.1	80.3	M+H	C30H48O3	-1.21313	3.35562	0.00375511	0.0641916	4.9556	31.0302	104942	3381.94	88489.1	107088	33688	51331.2	219353	129705	560.565	3930.49	3714.24	1642.56	4156.64	6287.16
8.07_327.2175m/z	327.218	8.06635	neg	ent-16-epi-16-F1t-PhytoP	LMFA02030009	Lipids and lipid-like molecules	Fatty Acyls	Octadecanoids			43.6	24.1	M-H	C18H32O5	-0.546328	3.35484	0.0193751	0.153592	-1.26072	0.417337	86934.1	208307	78486.6	68916.5	94692.1	102913	100643	75953.2	96576.2	224225	160850	107674	305654	354860
3.94_351.0667m/z	351.067	3.94247	neg	Phenazine methosulfate	65509	Unclassified	Unclassified	Unclassified			38	0	M+FA-H	C14H14N2O4S	3.4973	3.31962	0.000149201	0.0127911	6.16555	71.7819	96598.7	1345.72	141740	34362.6	136739	85274.7	84660.4	96816	1616.9	236.809	1659.36	1090.54	1357.64	2113.1
10.01_442.3443n	443.352	10.0081	pos	4beta-methyl-zymosterol-4alpha-carboxylic acid	LMST01010388	Lipids and lipid-like molecules	Sterol Lipids	Sterols			45.4	32	M+H-H2O, M+H	C29H46O3	-0.827696	3.30826	0.0288464	0.187096	0.516654	1.43063	448660	313610	465742	369276	433799	520677	472135	430333	179246	272402	491227	204634	401301	332848
11.47_453.3355m/z	453.335	11.4689	pos	gypsogenin	LMPR0106150010	Lipids and lipid-like molecules	Prenol lipids	Isoprenoids		C08950	48.5	53	M+H-H2O	C30H46O4	-1.76627	3.29614	0.0135615	0.126993	4.77206	27.3234	113238	4144.38	73904.6	90390.2	33427.7	69306.4	284373	128029	1084.5	3119.2	3480.05	1264.22	8442.03	7476.28
4.66_479.1493m/z	479.149	4.66357	neg	Lettucenin A	HMDB0036738	Organoheterocyclic compounds	Cycloheptafurans	Unclassified	*		40.7	11.7	2M-H	C15H12O3	-1.52318	3.28703	0.00111537	0.0341227	2.52681	5.76295	114662	19896.4	124092	117597	171397	86849.6	137204	50832.9	14203.1	80627.5	2564.75	2621.46	7387.88	11973.8
6.34_407.1743m/z	407.174	6.33677	neg	L-Tryptophan	HMDB0000929	Organoheterocyclic compounds	Indoles and derivatives	Indolyl carboxylic acids and derivatives	**	C00078	39.7	9.58	2M-H	C11H12N2O2	4.54065	3.23045	0.0419904	0.224723	0.636766	1.55484	331016	212894	194454	401309	266783	449137	358250	316160	200907	193760	119672	156508	356672	249843
14.42_291.0071m/z	291.007	14.415	neg	O-Ethyl S,S-diphenyl phosphorodithioate	HMDB0031781	Benzenoids	Benzene and substituted derivatives	Unclassified		C14436	37.2	5.49	M-H2O-H	C14H15O2PS2	-0.419654	3.1862	0.00442435	0.0702327	-0.290042	0.817878	432394	528678	420046	429346	448511	430314	428415	437733	528712	558726	454307	449509	593894	586918
11.90_508.3756m/z	508.376	11.905	pos	PC(O-18:1(1E)/0:0)	LMGP01070008	Lipids and lipid-like molecules	Glycerophospholipids	Glycerophosphocholines			41	14.1	M+H	C26H54NO6P	-0.990835	3.18035	0.00648273	0.0868846	1.29804	2.45894	181065	73635.2	247514	122200	284473	133883	130145	168175	41033.7	60931.4	84112.6	52285.3	137590	65858.8
4.22_160.0724n	159.065	4.2156	neg	3-Methyladipic acid	HMDB0000555	Lipids and lipid-like molecules	Fatty Acyls	Fatty acids and conjugates	***		55.2	85.1	M-H2O-H, M-H	C7H12O4	-7.48572	3.1543	0.00794684	0.0969584	0.740262	1.67048	246718	147693	315152	265225	192686	208150	238707	260389	190186	117123	219521	187715	92445.4	79168.1
10.26_574.2372m/z	574.237	10.2603	neg	Malformin	HMDB0029429	Organic acids and derivatives	Carboxylic acids and derivatives	Amino acids, peptides, and analogues			37.6	3.74	M+FA-H	C23H39N5O5S2	-0.418597	3.14646	8.90676e-05	0.00976909	-1.55284	0.340838	40628.4	119202	44222.8	24486.6	56872.7	50064.1	46270	21854.2	106213	156847	83600	102032	140749	125768
13.32_186.9809m/z	186.981	13.3187	pos	2-Oxo-4-methylthiobutanoic acid	HMDB0001553	Lipids and lipid-like molecules	Fatty Acyls	Fatty acids and conjugates	**	C01180	36.4	0	M+K	C5H8O3S	-11.3054	3.1217	0.00578135	0.0809453	-0.194431	0.873917	671102	767924	648343	695557	672748	671985	636104	701878	777107	788499	670853	719262	806969	844856
7.55_401.2772m/z	401.277	7.54943	pos	(E,E,E)-Sylvatine	HMDB0030186	Organoheterocyclic compounds	Benzodioxoles	Unclassified			37.3	0	M+NH4	C24H33NO3	-7.05636	3.11449	0.0122522	0.12108	-1.83548	0.280199	38977	139105	31866.1	32283.7	36254.8	45653.2	55485.4	32318.8	92280.5	274883	71939.8	66665	174395	154467
11.69_398.1993m/z	398.199	11.6853	pos	Scarlet Red	73202	Unclassified	Unclassified	Unclassified			36.3	0	M+NH4	C24H20N4O	4.68186	3.10285	0.0109678	0.114206	1.0795	2.1133	188096	89005.9	144577	195300	122316	270100	129238	267047	145964	60776.1	132318	63111.5	68290.4	63575.6
13.94_555.4041m/z	555.404	13.9419	pos	(3b,5a,22E,24S)-Stigmasta-7,22,25-trien-3-ol 3-glucoside	HMDB0033089	Lipids and lipid-like molecules	Steroids and steroid derivatives	Stigmastanes and derivatives	*		42.4	20.2	M+H-H2O	C35H56O6	-0.465351	3.08264	4.55792e-05	0.0073177	2.32174	4.99935	95330.3	19068.5	141690	96454.7	74373.1	103161	68005.1	88297.9	28529.2	14272.9	23489.8	25210.6	13059.6	9849.07
2.14_120.0809m/z	120.081	2.14347	pos	2-Hydroxyphenethylamine	HMDB0001065	Organic nitrogen compounds	Organonitrogen compounds	Amines		C02735	44	30.3	M+H-H2O	C8H11NO	1.20374	3.07368	0.0222537	0.164955	0.544692	1.45871	309593	212238	249525	399854	324215	285223	311352	287389	158543	324320	124365	202932	262407	200860
7.78_416.3518m/z	416.352	7.77787	pos	Teinemine	LMST01150010	Lipids and lipid-like molecules	Sterol Lipids	Sterols			52.8	70.6	M+H	C27H45NO2	-1.31915	3.06674	0.000330531	0.0191319	7.85985	232.301	78198	336.624	62660.8	82332.6	27819.8	100041	64126.4	132207	409.622	144.775	1231.91	164.067	67.7574	1.6103
13.44_789.6677m/z	789.668	13.4449	pos	DG(i-20:0/0:0/a-25:0)	HMDB0094226	Lipids and lipid-like molecules	Glycerolipids	Diradylglycerols	*		37.1	0	M+K	C48H94O5	-7.45415	3.05299	0.000118809	0.0116248	-0.372956	0.772199	259349	335858	262231	275944	260045	257896	272354	227626	354962	362360	354723	332262	305364	305479
14.99_358.9947m/z	358.995	14.9945	neg	2-(Fluoromethoxy)-1,1,3,3,3-pentafluoro-1-propene (Compound A)	2424	Unclassified	Unclassified	Unclassified			39.5	0	2M-H	C4H2F6O	0.0697804	3.012	0.00817339	0.0986741	-0.268622	0.830112	440395	530525	430936	436922	461048	440000	427641	445825	525363	552600	453722	453246	595575	602644
9.34_593.1297m/z	593.13	9.34342	neg	3''-O-Caffeoylcosmosiin	HMDB0037345	Phenylpropanoids and polyketides	Flavonoids	Flavonoid glycosides			45.8	31.8	M-H	C30H26O13	-0.690246	2.95542	0.03999	0.219795	-0.42246	0.746151	297852	399184	305451	224802	280236	328188	407276	241157	399146	401907	358676	281342	531194	422839
12.29_423.3255m/z	423.326	12.287	pos	5-Methyl-2,4-bis(3-methyl-2-butenyl)-6-(2-methyl-1-oxopropyl)-5-(4-methyl-3-pentenyl)cyclohexanone	HMDB0036012	Lipids and lipid-like molecules	Prenol lipids	Monoterpenoids	*		37.9	0	M+Na	C27H44O2	5.47037	2.93437	6.8606e-07	0.000944479	1.99821	3.99504	86336.5	21610.9	86179.5	88192.7	76871.4	90218.9	70648.7	105908	25469.4	14183.6	31639.3	27580.4	19062.4	11730.5
7.25_407.2800m/z	407.28	7.24645	neg	Norlithocholic acid	LMST04060023	Lipids and lipid-like molecules	Sterol Lipids	Bile acids and derivatives			47.4	41.2	M+FA-H	C23H38O3	-0.704804	2.8882	0.0412666	0.223235	-1.01209	0.495828	92611.8	186782	115400	61069.5	83625.9	159427	98093.9	38054.7	89768.6	193051	275209	99038.6	304108	159517
7.13_494.1886m/z	494.189	7.13242	neg	Validamycin B	91657	Organic oxygen compounds	Organooxygen compounds	Carbohydrates and carbohydrate conjugates			39.4	0	M-H2O-H	C20H35NO14	1.31995	2.79813	0.00194765	0.0451496	3.72292	13.2042	71041.6	5380.23	22381.7	108711	48222.1	56275.2	124324	66335.3	12129.9	6043.53	4163.97	7325.27	2208.05	410.657
13.23_209.0128m/z	209.013	13.2311	pos	Lactyltrimethylammonium betaine	HMDB0032684	Organometallic compounds	Organometalloid compounds	Organoarsenic compounds	*		36.9	0	M+H	C6H13AsO3	-12.0676	2.78985	0.00514074	0.0761621	-0.25032	0.84071	395475	470405	413090	399999	386026	402536	366617	404579	463542	481531	406626	426435	509054	535244
13.86_497.2884m/z	497.288	13.8562	neg	LysoPA(19:0/0:0)	HMDB0114746	Lipids and lipid-like molecules	Glycerophospholipids	Glycerophosphates	*		40.5	7.77	M+FA-H	C22H45O7P	-0.203115	2.78312	0.00924221	0.105018	-1.20924	0.432495	56843.8	131432	80960.1	17679.4	85959.3	70649.9	63912.5	21901.5	83183.7	124480	96491.8	113316	216629	154493
10.99_486.3332n	487.341	10.9868	pos	18alpha-Hydroxyglycyrrhetic acid	HMDB0040499	Lipids and lipid-like molecules	Prenol lipids	Triterpenoids	*		47.3	42.9	M+H-H2O, M+H	C30H46O5	-2.74635	2.78169	0.00142039	0.0389925	2.68591	6.43486	81878.1	12724.1	60221.1	48260.6	87342.1	51995.2	148206	95243.2	4480.15	8322.1	11619.5	6644.61	30505.6	14772.8
7.72_359.2802m/z	359.28	7.71685	neg	2-hydroxy-nonadecanoic acid	LMFA01050071	Lipids and lipid-like molecules	Fatty Acyls	Fatty Acids and Conjugates			45.3	29.2	M+FA-H	C19H38O3	-0.223317	2.77294	0.00665612	0.0883238	-1.93795	0.260986	26623.1	102010	24956.5	16511.2	18136.5	27531.6	55608.3	16994.7	61627.3	199185	80732.9	61816.7	90260.1	118436
9.95_549.2890m/z	549.289	9.94967	neg	Crenatine A	68081	Unclassified	Unclassified	Unclassified			37.4	0	M-H2O-H	C34H40N4O4	3.34268	2.77046	0.0275738	0.183044	7.13598	140.651	81128.6	576.806	23166.2	104187	40456.8	26646.6	224732	67583.5	685.091	913.851	361.464	850.558	231.327	418.545
0.68_265.1116m/z	265.112	0.6779	pos	Thiamine	229	Organoheterocyclic compounds	Diazines	Pyrimidines and pyrimidine derivatives	**	C00378	52.8	68.2	M+H	C12H16N4OS	-0.45655	2.77028	0.0135268	0.126902	-1.25386	0.419324	58174.7	138735	72904.3	25187.4	22285.2	73874.2	139723	15074.1	188637	109218	96196.7	90765.7	189135	158455
9.36_412.2455m/z	412.245	9.35543	pos	PE(13:0/0:0)	46713	Lipids and lipid-like molecules	Glycerophospholipids	Glycerophosphoethanolamines			44	23.1	M+H	C18H38NO7P	-0.980256	2.76865	4.53064e-09	3.79758e-05	-2.28576	0.205077	14358.4	70014.7	17418.3	14307.6	16167.2	14705.3	16865.5	6686.44	74790.6	71441.9	69102	60579	77984.8	66189.6
13.88_829.4899m/z	829.49	13.8774	pos	PI(14:1(9Z)/20:4(5Z,8Z,11Z,14Z))	LMGP06010099	Lipids and lipid-like molecules	Glycerophospholipids	Glycerophosphoinositols			38.4	0	M+H	C43H73O13P	4.47163	2.76693	0.00891962	0.102887	-2.01198	0.247933	25683.4	103590	13638.7	32617.4	34274.2	13275.4	56364	3930.44	172338	111492	135067	31179.7	41658.3	129805
12.55_495.2727m/z	495.273	12.553	neg	PA(19:1(9Z)/0:0)	LMGP10050025	Lipids and lipid-like molecules	Glycerophospholipids	Glycerophosphates			40.7	8.72	M+FA-H	C22H43O7P	-0.219411	2.74136	0.0459993	0.23365	-1.28769	0.409607	62703.9	153083	87342.6	19987.9	55778.2	62251.5	118209	32653.5	62808.9	119232	111574	91560	276304	257020
12.16_358.3312m/z	358.331	12.1601	pos	5-oxo-heneicosanoic acid	LMFA01060138	Lipids and lipid-like molecules	Fatty Acyls	Fatty Acids and Conjugates			46.2	35.8	M+NH4	C21H40O3	-0.994585	2.72201	0.000380038	0.0202418	2.30741	4.94993	81318.4	16428.2	83833.1	40522.3	126568	65019.6	97582	74385	30474.6	17218.4	13985.5	18219.2	9822.04	8849.43
10.93_524.3351m/z	524.335	10.9341	neg	PC(P-16:0/0:0)	LMGP01070006	Lipids and lipid-like molecules	Glycerophospholipids	Glycerophosphocholines	*		47.7	44.2	M+FA-H	C24H50NO6P	-1.43984	2.717	0.0333119	0.200423	1.17398	2.25633	173115	76724	234863	109823	317232	119286	86599.7	170885	69442.3	35048.3	95420.7	59515.5	140984	59933.5
11.69_437.2305m/z	437.231	11.6853	pos	Lespedezaflavanone F	LMPK12140344	Unclassified	Unclassified	Unclassified			37.2	0	M+H	C27H32O5	-3.94992	2.71545	0.00519192	0.076438	1.02207	2.03083	139764	68821	98988.7	150217	108159	190673	100167	190379	98768.4	57011.5	93402.5	44824.7	63812.5	55106.6
11.60_365.3048m/z	365.305	11.5981	pos	24-Nor-5β-cholane-3α,6α,23-triol	4123	Unclassified	Unclassified	Unclassified			53	69.7	M+H	C23H40O3	-0.559989	2.70583	0.00317294	0.0586667	-1.2206	0.429105	49640.1	115683	32637.4	51928	85943.2	19157.6	23868.1	84306.5	116638	153145	131764	102211	124323	66016.2
1.47_182.0450m/z	182.045	1.46963	neg	4-Pyridoxic acid	239	Organoheterocyclic compounds	Pyridines and derivatives	Pyridinecarboxylic acids and derivatives	**	C00847	50	57.4	M-H	C8H9NO4	-4.74942	2.70414	0.0306701	0.193105	-4.30382	0.0506314	4521.77	89307.5	5795.31	3080.49	2992.23	5127.46	4640.29	5494.84	5616.29	166704	8417.72	29803.9	151214	174090
10.98_486.3340n	485.327	10.9773	neg	Bassic acid	HMDB0034526	Lipids and lipid-like molecules	Steroids and steroid derivatives	Hydroxysteroids	*		42.7	19.7	M-H, M+FA-H	C30H46O5	-0.979638	2.68238	0.0209689	0.159831	2.14072	4.40981	107291	24330	55504.3	55765.7	233477	83043.2	128641	87313.2	4499.64	10308.2	6065.53	5545.02	83084.1	36477.5
4.75_228.1357n	227.128	4.75138	neg	3Z-dodecenedioic acid	LMFA01170137	Lipids and lipid-like molecules	Fatty Acyls	Fatty Acids and Conjugates			44.5	27.5	M-H, 2M-H	C12H20O4	-2.1714	2.65635	0.0202929	0.157301	0.731006	1.6598	201364	121318	327944	175353	160466	179993	184183	180245	159474	63763.3	124050	151096	113908	115619
5.74_389.2545m/z	389.254	5.73913	neg	12,13-dihydroxy-11-methoxy-9-octadecenoic acid	LMFA01080006	Lipids and lipid-like molecules	Fatty Acyls	Fatty Acids and Conjugates			40.5	8.27	M+FA-H	C19H36O5	0.00325959	2.61542	0.000270248	0.0175598	-0.706098	0.612976	89189.3	145502	109638	96064.4	73127.9	86637.8	88848.5	80819.6	120617	176388	152672	135466	161834	126037
13.01_270.2789m/z	270.279	13.0145	pos	1,16-Heptadecadien-3-one	LMFA12000191	Lipids and lipid-like molecules	Fatty Acyls	Oxygenated hydrocarbons			45.6	31.8	M+NH4	C17H32O	-0.90575	2.6134	0.0149332	0.133303	-0.184938	0.879687	506065	575279	458320	496432	542496	485438	469535	584171	599839	546124	610768	541952	602053	550937
14.99_368.9987m/z	368.999	14.9945	neg	Sedoheptulose 1,7-bisphosphate	HMDB0060274	Organic oxygen compounds	Organooxygen compounds	Carbohydrates and carbohydrate conjugates	**	C00447	38.8	2.56	M-H	C7H16O13P2	-1.80579	2.60822	0.00458437	0.0719143	-0.286939	0.819639	296653	361931	282930	301282	307911	293750	292156	301887	361047	375658	311571	310737	404233	408339
11.94_391.3198m/z	391.32	11.9449	pos	2-oxo-tricosanoic acid	LMFA01060144	Lipids and lipid-like molecules	Fatty Acyls	Fatty Acids and Conjugates			39	20	M+Na	C23H44O3	4.25434	2.59655	0.00757236	0.0946395	-1.76843	0.293527	27127.1	92417.4	32071.6	19986.4	22732.6	10133.3	8875.4	68962.9	132613	40761.4	77633.7	96211.7	149861	57424.2
4.82_134.0600m/z	134.06	4.81872	pos	Oxindole	34541	Organoheterocyclic compounds	Indoles and derivatives	Indolines		C12312	44.2	29.6	M+H	C8H7NO	0.0177896	2.57268	0.0213004	0.16104	0.725363	1.65332	168571	101959	155705	221709	99450.5	175696	228678	130185	158406	102181	88150.7	96184.7	104594	62238
4.71_236.0720m/z	236.072	4.70768	neg	Pranoprofen	HMDB0041996	Organoheterocyclic compounds	Benzopyrans	1-benzopyrans			37.2	12.4	M-H2O-H	C15H13NO3	1.07364	2.55982	3.19617e-05	0.00608628	2.0233	4.06513	65756.2	16175.7	52960.1	85635.2	48763.2	60956.8	82083.1	64138.8	15691.8	15251.4	29553.7	19503	10012.2	7042.15
9.51_443.2880m/z	443.288	9.51243	pos	PE(0:0/14:0)	LMGP02050033	Lipids and lipid-like molecules	Glycerophospholipids	Glycerophosphoethanolamines			38.2	1.37	M+NH4	C19H40NO7P	-0.159538	2.533	0.00657872	0.0875747	1.65362	3.14623	92796.7	29494.6	104643	76716.1	95132.1	27967.5	136841	115481	22088.8	78794	32317.1	21546.1	11823.8	10397.7
3.17_359.0771m/z	359.077	3.17065	neg	7,3'-Dihydroxy-5,4'-dimethoxy-4-phenylcoumarin	LMPK12100038	Unclassified	Unclassified	Unclassified			48.1	43.8	M+FA-H	C17H14O6	-0.478032	2.53262	0.00937501	0.105578	-0.962884	0.51303	70441	137304	73660.3	116061	78684.1	64950.6	47271.6	42018.3	210003	82273.9	144348	142401	140706	104090
4.41_259.1549m/z	259.155	4.41192	neg	11-oxo-dodecanoic acid	LMFA01060088	Lipids and lipid-like molecules	Fatty Acyls	Fatty Acids and Conjugates			44.5	24.9	M+FA-H	C12H22O3	-0.783097	2.48957	0.00584374	0.0814274	-1.67162	0.313901	27913.4	88924	36032.2	6066.26	22545.7	42349	52636.5	7850.44	92297	41838.5	49940.7	117775	89817.1	141875
13.30_533.2850m/z	533.285	13.2965	pos	OG-PA	LMGP20070021	Lipids and lipid-like molecules	Glycerophospholipids	Oxidized glycerophospholipids			39.6	7.87	M+H-H2O	C26H47O10P	-4.40074	2.48806	0.0452033	0.232193	-1.49952	0.353672	40722.8	115143	32772.9	22632.7	63228.5	33655.7	69643.3	22403.5	48372.1	169710	47203.9	57956.4	233210	134403
5.44_298.0840n	297.077	5.43577	neg	AH 6809	45603	Unclassified	Unclassified	Unclassified			53.3	69.9	M-H, M+FA-H	C17H14O5	-0.434943	2.46445	0.000137971	0.0123656	1.59369	3.01821	73273.4	24277.1	61823.9	73592.7	77110.9	74463.1	79788.5	72861.2	47846.9	9877.08	35556.6	40472.9	8024.76	3884.38
8.20_381.3107m/z	381.311	8.1977	pos	Leukotriene B4 dimethylamide	HMDB0005085	Lipids and lipid-like molecules	Fatty Acyls	Fatty amides	*		49.2	51.9	M+NH4	C22H37NO3	-1.38511	2.43756	0.0317591	0.195996	-2.52647	0.173563	14414.1	83048.6	10260	9888.22	17277.3	13276.3	24133.1	11649.9	35022	194452	24320.9	28726.5	118274	97496.3
11.30_457.3308m/z	457.331	11.2952	pos	7alpha,12alpha,26-Trihydroxy-5beta-cholestan-3-one	LMST04030100	Unclassified	Unclassified	Unclassified			45.4	38.2	M+Na	C27H46O4	4.52663	2.42175	0.0492989	0.241463	2.57677	5.96603	82242.6	13785.2	41462.7	75073.2	28541.6	41886.5	229507	76984.5	7933.81	21122.2	21013.5	11906.1	10452.1	10283.1
7.68_416.2461m/z	416.246	7.67972	pos	Sunitinib	45411	Organoheterocyclic compounds	Indoles and derivatives	Indolines			39.2	0	M+NH4	C22H27FN4O2	1.28791	2.4198	7.91115e-06	0.00312032	1.98385	3.95546	58584.1	14810.9	36282	70865.9	57636.2	59604.7	60151.7	66964.2	19726.5	9021.5	12089.2	15862.8	19846.1	12319.6
9.84_560.2216m/z	560.222	9.83728	neg	Alpha-Trisaccharide	HMDB0006595	Organic oxygen compounds	Organooxygen compounds	Carbohydrates and carbohydrate conjugates			38.5	1.51	M+FA-H	C20H37NO14	3.81492	2.38442	0.000147607	0.0127508	-3.32898	0.0995126	5117.62	51426.9	6223.82	4364.41	9278.98	4354.85	5120.76	1362.93	56560.1	51333.8	23717.8	39408	80248.9	57292.6
10.34_265.1476m/z	265.148	10.3423	neg	6,7-Dihydro-4-(hydroxymethyl)-2-(p-hydroxyphenethyl)-7-methyl-5H-2-pyrindinium	HMDB0033483	Benzenoids	Phenols	1-hydroxy-2-unsubstituted benzenoids			38	0	M-H2O-H	C18H22NO2+	1.50374	2.38141	0.0438869	0.22849	-0.182119	0.881407	505750	573799	484354	491709	525729	484242	481685	566785	573157	565166	497819	512790	652470	641391
11.28_457.3322m/z	457.332	11.2835	neg	4a-Formyl-5a-cholesta-8,24-dien-3b-ol	HMDB0001203	Lipids and lipid-like molecules	Steroids and steroid derivatives	Cholestane steroids	*		46.6	39.7	M+FA-H	C28H44O2	-0.438816	2.37643	0.00327794	0.0595777	2.11269	4.32498	65639.3	15176.8	50716.7	69687.2	31768.8	41612.4	118379	81671.7	9884.66	26327.4	17703.7	11323.6	13741.8	12079.5
11.97_472.3549n	471.348	11.9681	neg	(3beta,23xi)-3,23-Dihydroxycycloart-24-en-26-oic acid	HMDB0034567	Lipids and lipid-like molecules	Steroids and steroid derivatives	Cycloartanols and derivatives	*		41.2	15.3	M-H, M+FA-H	C30H48O4	-0.7888	2.37623	0.0136286	0.127283	3.15973	8.93665	63381.3	7092.29	46874.8	61234.2	23111.1	31114.1	149952	68001.7	1917.92	19083.4	6977.6	6183.48	5798.18	2593.14
14.52_387.0254m/z	387.025	14.5226	neg	5-Fluorouridine monophosphate	HMDB0060397	Nucleosides, nucleotides, and analogues	Pyrimidine nucleotides	Pyrimidine ribonucleotides	**	C16634	38	4.57	M+FA-H	C9H12FN2O9P	2.33645	2.3713	0.000929377	0.0315789	-0.364735	0.776612	171040	220239	164153	173589	177040	167572	169062	174827	228194	236913	186403	189228	241681	239017
11.15_550.3513m/z	550.351	11.1545	neg	PC(17:0/2:0)	LMGP01010714	Lipids and lipid-like molecules	Glycerophospholipids	Glycerophosphocholines			51.2	63.1	M-H	C27H54NO8P	-0.188818	2.37111	0.0194822	0.153863	1.21155	2.31587	118278	51073.1	184482	84415.8	189279	60900.9	79852.4	110740	46903.8	35541.9	74116.7	32644.4	79887	37344.6
11.88_481.3284m/z	481.328	11.8827	pos	DG(8:0/0:0/15:0)	HMDB0092918	Lipids and lipid-like molecules	Glycerolipids	Diradylglycerols	*		42.7	19.6	M+K	C26H50O5	-1.36863	2.34593	0.0228692	0.166783	0.71435	1.64074	159132	96987.7	143529	151799	149045	205658	177990	126771	87427.7	133413	171041	97180.9	52851.8	40011.9
0.78_203.1159n	204.123	0.775233	pos	Acetyl-D-carnitine	LMFA07070049	Lipids and lipid-like molecules	Fatty Acyls	Fatty esters			42.1	13.9	M+H-H2O, M+H	C9H17NO4	0.562121	2.34204	0.00112291	0.0341493	1.14868	2.2171	87944.1	39666.2	96252.3	97739.7	110054	64908.2	58123.5	100587	47073.7	16155.7	43528.1	45212	26796.2	59231.6
4.75_228.1361n	211.133	4.7532	pos	(-)-11-hydroxy-9,10-dihydrojasmonic acid	LMFA02020012	Lipids and lipid-like molecules	Fatty Acyls	Octadecanoids			48.8	47.2	M+H-H2O, M+H	C12H20O4	-0.0491918	2.33976	0.0198649	0.155465	0.932228	1.90822	130586	68433.5	234647	114559	95665.6	114304	117144	107198	79264.3	32425.5	81859.1	83299.3	69211.8	64541
8.45_442.3440n	425.341	8.45358	pos	Nebrosteroid I	LMST01031111	Lipids and lipid-like molecules	Sterol Lipids	Sterols			44.1	25.9	M+H-H2O, M+H	C29H46O3	-1.55808	2.33019	0.00109878	0.0340269	2.54922	5.85317	53619	9160.67	49776.7	92226	38947.6	33720.5	71582.7	35460.3	3109.98	10980.8	10235.2	3485.25	16218.2	10934.6
12.07_443.3516m/z	443.352	12.0719	pos	4a-Methylzymosterol-4-carboxylic acid	HMDB0006927	Lipids and lipid-like molecules	Prenol lipids	Triterpenoids	**	C15808	53.7	76.8	M+H	C29H46O3	-0.944781	2.32355	0.0137012	0.127398	0.560363	1.47464	174186	118121	188538	201370	143243	173558	162807	175601	72693.7	174862	117051	74227.7	154632	115260
0.54_576.4752n	599.464	0.5388	pos	DG(15:0/18:3(6Z,9Z,12Z)/0:0)	HMDB0007075	Lipids and lipid-like molecules	Fatty Acyls	Lineolic acids and derivatives	*		39	0	M+H-H2O, M+Na	C36H64O5	-0.336671	2.3196	0.0110026	0.11428	-1.35475	0.391003	34975.7	89451.4	62827.6	27076	39006	43118.9	25352.7	12473.1	33170.8	110825	59119.9	83166.2	109011	141416
3.58_333.0398m/z	333.04	3.57655	neg	13alpha-Hydroxydolineone	HMDB0030756	Phenylpropanoids and polyketides	Isoflavonoids	Rotenoids			37.9	1.02	M-H2O-H	C19H12O7	-1.86645	2.29663	0.000324644	0.0190949	7.07896	135.201	46310.7	342.533	70296.6	33670.8	76305.7	32176.5	30263.4	35151.2	336.656	344.743	446.442	272.648	368.015	286.694
10.97_502.3261m/z	502.326	10.9653	pos	PC(O-16:1(9E)/0:0)	LMGP01060029	Lipids and lipid-like molecules	Glycerophospholipids	Glycerophosphocholines			42.4	18.5	M+Na	C24H50NO6P	-1.43872	2.29242	0.0117603	0.118369	1.51542	2.85882	92550.6	32373.7	131198	45152.5	160595	94553.3	47359.1	76446.2	31847.2	17151.3	49851.1	32821.1	43135.1	19436.6
11.61_364.2976n	363.29	11.6101	neg	4-Hydroxy-3-(16-methylheptadecyl)-2H-pyran-2-one	HMDB0032093	Organoheterocyclic compounds	Pyrans	Pyranones and derivatives			40	4.92	M-H, M+FA-H	C23H40O3	-0.344004	2.27717	0.0102122	0.109648	-1.11782	0.460789	43499.3	94401.8	21215.8	46184.2	89535	12506.8	16972.8	74581	98716.2	101690	113395	92513.1	109187	50908.7
12.54_499.3770m/z	499.377	12.5443	pos	beta-Boswellic acid acetate	90491	Lipids and lipid-like molecules	Prenol lipids	Triterpenoids	*		45.2	33.1	M+H	C32H50O4	-2.29717	2.27674	1.18363e-05	0.00369865	1.16514	2.24256	73799	32908.4	77008.3	74845.5	86578.2	66071.2	54656.1	83634.9	30126.5	30509.8	40378.1	28914.7	34201.3	33320.3
13.64_601.4801m/z	601.48	13.6376	pos	DG(15:1(9Z)/18:1(9Z)/0:0)[iso2]	LMGL02010456	Lipids and lipid-like molecules	Glycerolipids	Diradylglycerols			39.9	7.13	M+Na	C36H66O5	-0.20366	2.26962	0.00835237	0.099478	-1.11599	0.461374	43135.8	93494.3	59652	31317.6	47765.2	61172.4	34585.6	24322.3	60463.9	126996	61832.2	65130.4	115819	130724
11.07_534.2810m/z	534.281	11.0661	neg	PS-PE	LMGP20020033	Lipids and lipid-like molecules	Glycerophospholipids	Oxidized glycerophospholipids			38.6	7.33	M-H2O-H	C25H48NO10P	-4.93812	2.25656	0.00455217	0.071543	-2.13176	0.228179	14189.4	62185.3	18642.6	5704.9	17619.9	22578.8	16128.1	4461.84	45014.7	88952.1	30427.8	27074	85497.2	96145.7
7.64_303.1701m/z	303.17	7.64053	pos	Hydromorphone	HMDB0014472	Alkaloids and derivatives	Morphinans	Unclassified		C07042	46.8	36.9	M+NH4	C17H19NO3	-0.830058	2.25378	0.0383961	0.215804	1.81338	3.51466	81986.2	23326.9	23191.3	107416	172431	22718.9	107142	59018.4	13348.7	54441.8	19296.2	21847.2	17601.1	13426.4
7.39_319.1136m/z	319.114	7.39365	neg	3-Epihydroxy-2'-deoxymugineic acid	70950	Unclassified	Unclassified	Unclassified			38.6	0	M-H	C12H20N2O8	-3.48769	2.24464	6.89044e-05	0.00911932	0.788846	1.72769	95200.5	55102.7	105845	95308.2	87228.6	96855.3	90907.3	95058.5	70352.4	39435.5	49624.9	73155	53243.1	44805.6
4.79_658.2615n	703.26	4.79485	neg	Gluten exorphin B5	HMDB0059795	Organic acids and derivatives	Carboxylic acids and derivatives	Amino acids, peptides, and analogues			47.5	44	M-H, M+FA-H	C30H38N6O11	2.47224	2.24149	1.6226e-05	0.00432185	1.70699	3.26478	54473.4	16685.2	50590	63501.6	38694.9	52794	64839.7	56420.3	23807.5	16307.8	17086.6	25574	9718.39	7616.6
1.11_187.0411m/z	187.041	1.1091	neg	F-Honaucin A	65489	Unclassified	Unclassified	Unclassified			39.1	0	M-H	C8H9FO4	-0.54188	2.22324	0.0275701	0.183044	1.19577	2.29067	106162	46345.2	81547.5	83657.4	186497	105408	61828.9	118031	36551	8899.18	102185	77697.5	19422.3	33316.3
3.69_340.0426m/z	340.043	3.68837	neg	4-Quinolinemethanol, 2,8-bis(trifluoromethyl)-	1105	Unclassified	Unclassified	Unclassified			38.8	0	M+FA-H	C12H7F6NO	3.96578	2.22231	0.000588482	0.0253527	7.08049	135.344	45379.3	335.287	74548.5	15941.1	66150.5	32797.8	32562.3	50275.5	698.272	318.989	423.8	492.238	78.4243	3.86958e-05
9.37_410.2309m/z	410.231	9.3656	neg	PC(10:0/0:0)[U]	40272	Unclassified	Unclassified	Unclassified			39	0	M-H	C18H38NO7P	-0.910013	2.17901	5.39218e-07	0.000847449	-2.88765	0.135123	5491.35	40639.6	7846.49	4428.11	6589.19	4987.19	7091.91	2005.19	40763.8	41802.4	37233.3	31746.8	53821	38470.1
4.62_193.1224m/z	193.122	4.62118	pos	2E,6E,8E,10E-dodecatetraenoic acid	73916	Lipids and lipid-like molecules	Fatty Acyls	Fatty Acids and Conjugates			53.3	71.6	M+H	C12H16O2	0.354906	2.16803	0.00560155	0.0795724	0.749005	1.68063	115268	68585.8	148229	103684	103419	119200	104768	112306	94907.2	36880.8	90204.7	95297.8	47320	46904.5
11.39_605.3070m/z	605.307	11.3901	neg	1,25-Dihydroxy-20S-21-(3-hydroxy-3-methylbutyl)-23-yne-26,27-hexafluorovitamin D3	LMST03020620	Lipids and lipid-like molecules	Sterol Lipids	Secosteroids			47.9	42.8	M-H	C32H44F6O4	-0.229861	2.15702	0.00772136	0.0956395	7.01586	129.415	45027.3	347.929	32159.5	33633.4	12989.2	32293.2	107462	51626.2	323.836	1214.21	195.958	353.57	3.86958e-05	3.86958e-05
5.89_499.1594m/z	499.159	5.8913	neg	3,4,5-trihydroxy-6-({8-hydroxy-17-methoxy-10-oxo-2-oxatricyclo[13.2.2.1³,⁷]icosa-1(17),3,5,7(20),15,18-hexaen-4-yl}oxy)oxane-2-carboxylic acid	HMDB0133428	Lignans, neolignans and related compounds	Lignan glycosides	Unclassified			50.2	67.2	M-H2O-H	C26H30O11	-2.97184	2.15673	0.00108555	0.0339096	1.60264	3.03699	57753.5	19016.7	25130.3	73176	60437.1	46740.3	74479.2	66558	33575.3	16554.9	13225.5	24378.1	18382.4	7984.07
11.69_245.2261m/z	245.226	11.6853	pos	9Z,12Z,15Z-Octadecatrienal	LMFA06000243	Lipids and lipid-like molecules	Fatty Acyls	Fatty aldehydes			44.8	28.1	M+H-H2O	C18H30O	-1.07607	2.15055	0.0122161	0.121079	1.19089	2.28293	85598.8	37495.2	56585.3	89290.4	55725.9	129866	54509	127616	55195.3	28262.7	55248.1	22295.8	34125	29844
10.51_520.2661m/z	520.266	10.5078	neg	LysoPE(0:0/18:3(9Z,12Z,15Z))	HMDB0011479	Lipids and lipid-like molecules	Glycerophospholipids	Glycerophosphoethanolamines	*		38.6	1.26	M+FA-H	C23H42NO7P	-4.09469	2.13269	0.0254976	0.176313	-1.21615	0.430431	38474.2	89385.3	46078.4	30753.9	44911.4	40623.4	44980.8	23497.3	76235.3	169247	37935.5	51641.3	99458	101795
7.39_184.1462n	185.154	7.38997	pos	6Z-undecenoic acid	34885	Lipids and lipid-like molecules	Fatty Acyls	Fatty Acids and Conjugates			52.2	63.4	M+H-H2O, M+H	C11H20O2	-0.586021	2.10056	0.000103826	0.0107382	1.08304	2.1185	65315.2	30830.9	55171.6	77180.2	61394.5	73209.5	64148	60787.5	41366.9	18691.8	31998.9	45334.6	27045.3	20547.8
12.91_441.3359m/z	441.336	12.9079	pos	5alpha-Cholest-25-ene-3alpha,7alpha,12alpha-triol	LMST04030089	Unclassified	Unclassified	Unclassified			45.7	54.8	M+Na	C27H46O3	4.78487	2.09944	1.41807e-05	0.00409871	0.745524	1.67658	85075.2	50743.2	87626.9	84528	79043.6	75372.8	87373.6	96506.7	49038.8	43553.2	50847.7	47159.1	65852.9	48007.8
13.06_198.0171m/z	198.017	13.0582	pos	O-Phospho-4-hydroxy-L-threonine	HMDB0006802	Organic acids and derivatives	Carboxylic acids and derivatives	Amino acids, peptides, and analogues	**	C06055	38.7	0	M+H-H2O	C4H10NO7P	4.11051	2.09225	0.000264088	0.0173198	-0.324951	0.798325	145038	181678	151064	147822	140046	146465	138629	146201	183951	191442	156151	170304	190211	198007
13.32_575.4645m/z	575.465	13.3187	pos	DG(15:1(9Z)/16:0/0:0)[iso2]	LMGL02010450	Lipids and lipid-like molecules	Glycerolipids	Diradylglycerols			39.9	4.56	M+Na	C34H64O5	-0.094428	2.08056	0.00494571	0.074604	-0.787786	0.579232	55439.2	95711.5	65206.8	41360.3	57507.5	76953.4	47149.9	44457.2	69886.4	137854	76486	94811.1	99718	95513.4
5.26_403.2336m/z	403.234	5.2592	neg	R-2-Hydroxy-3-methylbutanoic acid 3-Methylbutanoyl	HMDB0031510	Lipids and lipid-like molecules	Fatty Acyls	Fatty acid esters	*		39.3	3.42	2M-H	C10H18O4	-0.429376	2.07834	0.00830083	0.0991859	-0.801994	0.573556	57676.7	100560	81374	73889.1	39510.1	49388.3	53903.4	47995.1	86780.7	130919	135509	95662.8	90573.7	63914.2
5.28_515.1316m/z	515.132	5.2808	neg	Aprepitant	HMDB0014811	Organoheterocyclic compounds	Oxazinanes	Morpholines			39.1	0	M-H2O-H	C23H21F7N4O3	-1.31675	2.06968	0.048584	0.239501	-2.40693	0.188557	11942.9	63338.4	70464.1	130.672	131.791	374.81	294.068	261.895	119594	52919.1	100750	90326	3.86958e-05	16441.2
9.05_450.3340n	449.327	9.05403	neg	5-Cholestene-3beta,7alpha,12alpha,24,25-pentol	LMST04030082	Unclassified	Unclassified	Unclassified			41	19.8	M-H, M+FA-H	C27H46O5	-1.12411	2.06444	0.0114388	0.116771	-1.39918	0.379144	26059.2	68731.7	36532.4	13464.9	18804.7	32452.4	45804.2	9296.59	41456.5	95853.5	105618	35952.6	47193.1	86316.5
14.68_424.2973n	425.305	14.6832	pos	1-Octadecyl Lysophosphatidic Acid	45219	Unclassified	Unclassified	Unclassified			44.4	34.9	M+H, M+Na	C21H45O6P	4.64498	2.06197	0.00959523	0.107046	0.795647	1.73586	102756	59196.4	90470.9	72309.9	93234.5	116326	153072	91125.6	82791	44917.9	73844.1	64858	51987.4	36780
0.79_164.0474n	182.081	0.793483	pos	9-hydroxy-7Z-Nonene-3,5-diynoic acid	LMFA01030722	Lipids and lipid-like molecules	Fatty Acyls	Fatty Acids and Conjugates			45.4	32.4	M+H, M+NH4, M+H-H2O	C9H8O3	0.35705	2.05439	0.00686524	0.0898663	0.309978	1.23969	199542	160961	199997	236242	207731	181679	181011	190590	164673	165482	127315	179643	154660	173993
10.26_299.2577m/z	299.258	10.2554	pos	12R-HOME(13Z)	LMFA02000085	Lipids and lipid-like molecules	Fatty Acyls	Octadecanoids			42.6	17.3	M+H	C18H34O3	-1.13569	2.05146	0.00793823	0.0969004	-0.702259	0.614609	66447.1	108113	62826.2	52122.9	65847.3	65534.9	97309	55042	92915.5	147799	84291.2	81162	124346	118163
12.84_419.3514m/z	419.351	12.8422	pos	7alpha,26-dihydroxy-5beta-cholestan-3-one	57918	Lipids and lipid-like molecules	Steroids and steroid derivatives	Bile acids, alcohols and derivatives	*		51.8	67.5	M+H	C27H46O3	-1.40038	2.03489	2.29605e-05	0.00510941	-1.59991	0.329897	15745.6	47728.8	11367.6	14747.6	10038.1	14041.8	12708.7	31569.7	48808.7	49077	53805.1	46140.4	53697.2	34844.4
9.49_425.3411m/z	425.341	9.4895	pos	4alpha-carboxy-4beta-methyl-zymosterol	LMST01010150	Lipids and lipid-like molecules	Prenol lipids	Triterpenoids	*		47.4	41.9	M+H-H2O	C29H46O3	-0.734786	2.03434	0.0287148	0.186776	0.655615	1.57529	133502	84747.9	150999	121380	108064	120122	174143	126306	30723.1	90076.8	128790	44961.3	122789	91146.9
3.04_206.0452m/z	206.045	3.04127	neg	2-{[hydroxy(3-hydroxy-5-methoxyphenyl)methylidene]amino}acetic acid	HMDB0128032	Organic acids and derivatives	Carboxylic acids and derivatives	Amino acids, peptides, and analogues			45.1	41.1	M-H2O-H	C10H11NO5	-3.12899	2.02646	0.006341	0.0856602	-2.60555	0.164306	7959.68	48444.4	12316.6	6377.82	5137.82	6667.21	9192.36	8066.23	30818.6	59566.9	5595.46	38601.2	79675	76409.1
10.30_312.2298n	335.219	10.3004	pos	8,13-dihydroxy-9,11-octadecadienoic acid	35506	Unclassified	Unclassified	Unclassified			48	43.6	M+H-H2O, M+Na, M+H, M+NH4	C18H32O4	-0.719506	2.02424	0.00462032	0.0722978	0.689981	1.61326	104251	64621.3	85493	93441.7	85411.6	137608	99149	124404	74368.4	40927.8	76502	49000.8	71097.6	75831.5
11.40_346.1896m/z	346.19	11.4027	pos	6-Hydroxyindoramin	831	Unclassified	Unclassified	Unclassified			37.1	0	M+H-H2O	C22H25N3O2	-4.88851	2.02077	0.00166624	0.0417739	7.40787	169.821	35569.2	209.451	26588.4	38265.5	12015.2	18087.5	59155.6	59302.8	179.539	449.44	122.207	391.209	3.86958e-05	114.31
9.75_485.3268m/z	485.327	9.75358	neg	(1beta,2alpha,3alpha)-1,2,3,24-Tetrahydroxy-12-oleanen-28-oic acid	HMDB0035487	Lipids and lipid-like molecules	Prenol lipids	Triterpenoids	*		41.9	19.7	M-H2O-H	C30H48O6	-0.812784	2.02063	0.0423886	0.225255	1.21208	2.31672	81770.8	35295.9	38673.7	80027.6	57318	61469.3	170445	82691.1	17893.6	43777.5	32513.3	16675.3	44957.2	55958.7
9.84_580.3279m/z	580.328	9.83728	neg	PC(16:1(9Z)/2:0)	LMGP01010693	Lipids and lipid-like molecules	Glycerophospholipids	Glycerophosphocholines			40.7	13.7	M+FA-H	C26H50NO8P	4.26147	2.01003	0.0171021	0.144108	1.39965	2.63837	67971.6	25762.7	31405	98944.8	79848.1	88171.5	31627.3	77832.8	32576.9	20153.7	56946.1	39306	4341.94	1251.56
11.34_344.2792m/z	344.279	11.3398	pos	N-palmitoyl serine	75483	Lipids and lipid-like molecules	Fatty Acyls	Fatty amides			51.1	59.8	M+H	C19H37NO4	-1.02634	2.00494	2.282e-05	0.00510941	-0.753361	0.59322	46204.1	77887.1	37830.5	48441.3	42528.1	53947.5	49215.2	45262.3	91831.2	73410	75973.3	76330	83577.7	66200.1
13.70_217.1950m/z	217.195	13.7038	pos	4,6,11-hexadecatrienal	LMFA06000096	Lipids and lipid-like molecules	Fatty Acyls	Fatty aldehydes			47.2	39.7	M+H-H2O	C16H26O	-0.476439	2.00072	0.000471146	0.0222696	1.43791	2.70928	52827.5	19498.7	31142.2	61309.7	60203.7	69555.4	42254.2	52500	20012.9	15060	27020	30306.2	13021.6	11571.5
7.12_375.1844m/z	375.184	7.12367	neg	Antipyrine	HMDB0015503	Organoheterocyclic compounds	Azoles	Pyrazoles		C13244	38.4	3.94	2M-H	C11H12N2O	4.72107	2.00045	0.031821	0.196028	0.422027	1.33981	173239	129301	139617	186686	178798	180728	187212	166391	192492	93004.3	114343	161550	115181	99236.7
7.86_439.1829m/z	439.183	7.86185	neg	cis-3-Hexenyl b-primeveroside	HMDB0031690	Lipids and lipid-like molecules	Fatty Acyls	Fatty acyl glycosides	*		41.1	10	M+FA-H	C17H30O10	1.90491	1.98527	0.00110684	0.0340667	1.35701	2.56153	53909.1	21045.7	41007.6	61861.5	37092	48766	82027.8	52699.7	29055.2	13321.1	15713.5	22890.6	29480.5	15813.2
10.06_545.3236m/z	545.324	10.0573	neg	PG(22:2(13Z,16Z)/0:0)	LMGP04050027	Lipids and lipid-like molecules	Glycerophospholipids	Glycerophosphoglycerols			38.4	0.109	M-H2O-H	C28H53O9P	-2.21534	1.98448	0.00838774	0.0996808	-1.23159	0.425846	29747.2	69854.4	31201.2	42109.8	32109.3	22358.9	25320.7	25383.5	72175	122570	63872.5	73019.3	38381.6	49108
11.15_610.3383m/z	610.338	11.1545	neg	Indinavir-N-oxide	819	Unclassified	Unclassified	Unclassified			38.2	0	M-H2O-H	C36H47N5O5	-2.55743	1.9804	0.0137246	0.127398	1.46426	2.75923	65842.9	23862.8	36665.3	45205.9	70605.2	95384.7	89876.3	57320.1	14491.5	16832.2	67351.6	38469.4	4684	1348.07
5.32_465.0775m/z	465.078	5.32362	neg	Musca-aurin-II	67064	Unclassified	Unclassified	Unclassified			38.9	0	M+FA-H	C18H16N2O10	-2.84495	1.98003	0.00699695	0.0908478	-4.54006	0.0429838	1782.57	41470.8	723.844	4852.95	770.114	667.211	2955.52	725.784	79368.9	42966.1	460.119	64292.2	42133.8	19603.7
11.88_552.3667m/z	552.367	11.8807	neg	PC(O-18:1(11Z)/0:0)	LMGP01060034	Lipids and lipid-like molecules	Glycerophospholipids	Glycerophosphocholines			48.1	47.2	M+FA-H	C26H54NO6P	-0.705463	1.96992	0.0157595	0.137552	1.13706	2.19933	83137.1	37801.1	113849	51927.5	134683	66154.5	61100.1	71108.8	20372.8	31881.2	36918.4	20788.8	71567.6	45278.1
10.94_428.3729m/z	428.373	10.9434	pos	Stearoylcarnitine	LMFA07070008	Lipids and lipid-like molecules	Fatty Acyls	Fatty acid esters	*		42.2	15.6	M+H	C25H49NO4	-1.34576	1.96446	0.0431206	0.226588	0.856114	1.81016	114388	63192.6	112338	85196.1	130511	178963	77675.9	101647	32317.1	58105.8	139148	69270.4	43754.2	36559.7
9.10_363.1941m/z	363.194	9.10285	neg	PA(14:0/0:0)	LMGP10050007	Lipids and lipid-like molecules	Glycerophospholipids	Glycerophosphates	*		40.3	5.84	M-H2O-H	C17H35O7P	-0.35745	1.95948	0.00311029	0.0579773	3.69564	12.9568	40381.3	3116.6	47571.3	24131.4	33556.5	81034.5	17408.6	38585.7	3.86958e-05	17116.4	3.86958e-05	62.6989	554.345	966.182
6.20_413.1613m/z	413.161	6.19508	neg	Sphaerosinin	LMPK12080019	Lipids and lipid-like molecules	Polyketides	Flavonoids			39.6	7.26	M+FA-H	C22H24O5	2.05762	1.9583	0.000617605	0.0258838	0.975802	1.96673	63342.9	32207.2	42527.4	77021.2	57765.3	58851.2	71816.6	72075.9	40515.7	25316.5	22619.7	40052.2	40069.4	24669.5
13.15_370.3312m/z	370.331	13.1452	pos	N-palmitoyl isoleucine	75494	Lipids and lipid-like molecules	Fatty Acyls	Fatty amides			42.6	18.8	M+H	C22H43NO3	-0.993522	1.95818	0.0321732	0.197468	0.467155	1.38238	171483	124049	173727	151967	213681	177904	134760	176858	166591	82839.2	140285	157977	121558	75042.4
9.26_410.2311m/z	410.231	9.25827	neg	C17 Sphingosine-1-phosphate	LMSP01050007	Lipids and lipid-like molecules	Sphingolipids	Sphingoid bases			42.9	17.9	M+FA-H	C17H36NO5P	-0.708317	1.95523	0.000127545	0.0120122	-2.23618	0.212248	8397.41	39564.2	9703.06	9892.92	10077.4	8938.93	7607.19	4164.89	57101	27824.1	26929.3	35005.9	51822.7	38702
5.55_330.1102n	313.107	5.5521	pos	2'-Hydroxymatteucinol	LMPK12140504	Lipids and lipid-like molecules	Polyketides	Flavonoids			49.2	49.6	M+H-H2O, M+H	C18H18O6	-0.37297	1.9503	0.0206648	0.158763	-1.90785	0.266489	15724.3	59005.6	16441.5	23056	13090.6	12767.5	14195.2	14795.2	101171	39551.6	19572	109823	57952.1	25964.1
11.34_512.2978m/z	512.298	11.3398	pos	1-(2-methoxy-6Z-hexadecenyl)-sn-glycero-3-phosphoserine	LMGP03060012	Lipids and lipid-like molecules	Glycerophospholipids	Glycerophosphoserines			41.3	11.8	M+H	C23H46NO9P	-1.02029	1.94878	0.0186808	0.150647	-1.16944	0.444592	32357.8	72780.8	48835.8	36700.6	43203	25899.7	20481.7	19026.1	75216	131512	61992.7	30910.8	61199.1	75854.2
10.17_300.2895m/z	300.289	10.1653	pos	Phytosphingosine	LMSP01030001	Organic nitrogen compounds	Organonitrogen compounds	Amines	**	C12144	52.8	67.9	M+H-H2O	C18H39NO3	-0.670181	1.94148	0.0429993	0.226351	-0.94284	0.520208	49914.3	95950.6	41782.9	43941.4	45416.4	55582.3	70589.2	42173.4	62807	105032	51542.9	54738.3	163757	137826
6.87_373.2594m/z	373.259	6.87353	neg	Avocadene 1-acetate	LMFA05000640	Lipids and lipid-like molecules	Fatty Acyls	Fatty alcohols	*		40.6	9.81	M+FA-H	C19H36O4	-0.454148	1.9385	0.0068726	0.0899159	-0.630931	0.64576	66426.4	102865	89673.3	60737.7	58464.6	73223.2	63728.2	52731.1	84395	93206	81907.6	94719.2	133576	129389
1.29_120.0577n	121.065	1.28698	pos	4-Hydroxystyrene	7012	Benzenoids	Benzene and substituted derivatives	Styrenes		C05627	48.5	44.8	M+H, M+NH4, M+H-H2O	C8H8O	1.41436	1.93487	0.0257824	0.177403	-2.56855	0.168574	8424.53	49975.3	9189.73	8412.54	9843.1	7524.49	7342.16	8235.18	27070.7	47275.9	23787.1	15126.1	119557	67034.7
0.89_201.0374m/z	201.037	0.8866	neg	2-(2-Thienylmethylene)-1,6-dioxaspiro[4.4]non-3-ene	HMDB0034857	Organic oxygen compounds	Organooxygen compounds	Ethers			38.1	4.74	M-H2O-H	C12H12O2S	-2.61177	1.93479	0.018238	0.148949	1.72413	3.30382	61292.9	18552.1	44698.8	49821.3	105815	61403.8	20056.5	85962.2	8339.17	2033.22	47777.5	43148.6	3976.34	6038
7.90_377.1624n	378.17	7.90015	pos	Imidaprilat	HMDB0041908	Organic acids and derivatives	Carboxylic acids and derivatives	Amino acids, peptides, and analogues			36.6	0	M+H, M+Na	C18H23N3O6	9.75757	1.93395	0.0260924	0.178309	2.19054	4.56475	53608.2	11744	58953.9	39395.6	67164.4	2070.11	112945	41120.2	39150.4	9959.82	11648.3	5295.36	2293.62	2116.26
12.50_355.3083n	378.297	12.4999	pos	N-Hexadecyl-L-hydroxyproline	34538	Unclassified	Unclassified	Unclassified			44.8	30.4	M+H, M+Na	C21H41NO3	-1.03925	1.93008	0.00904428	0.103564	0.13801	1.10039	413770	376023	392049	413757	443648	448190	389064	395915	389420	357921	371460	383898	372737	380702
0.73_195.0195n	194.012	0.731767	neg	Carbocysteine sulfoxide	1527	Unclassified	Unclassified	Unclassified			38.4	0	M-H, M+FA-H, M-H2O-H	C5H9NO5S	-3.42559	1.9282	0.00080817	0.0293557	4.52022	22.9468	32407.6	1412.29	39837.2	38134.5	4997.55	29206.7	53040.4	29229.4	1413.83	506.353	3068.92	1892.28	588.067	1004.32
12.29_342.3001m/z	342.3	12.287	pos	20-HEDE	LMFA03000010	Lipids and lipid-like molecules	Fatty Acyls	Eicosanoids			44.8	27.4	M+NH4	C20H36O3	-0.441941	1.92524	0.00262005	0.0532866	1.86829	3.65099	46646.7	12776.5	65874.3	38972.3	32366.6	24730	76551.6	41385.2	14556.7	18024.1	12866.8	17667.5	9601.03	3942.54
12.09_379.2840m/z	379.284	12.0941	pos	1-AG	62360	Unclassified	Unclassified	Unclassified			50.2	56.8	M+H	C23H38O4	-0.659547	1.92253	0.00410188	0.066891	1.74153	3.3439	48950.5	14638.7	38512.5	66514.5	53907.2	25913.7	32536.8	76318.3	8744.24	36395.3	13752.8	8057.14	10443.5	10439.4
12.14_342.3001m/z	342.3	12.1378	pos	11R-HEDE	LMFA03000005	Lipids and lipid-like molecules	Fatty Acyls	Eicosanoids			42.3	17.2	M+NH4	C20H36O3	-0.635773	1.91817	0.00143082	0.0390657	1.29645	2.45623	55705.5	22679.3	73580.3	63980.5	68325.5	40307.8	38479.2	49559.9	35157.4	13856.5	30324.2	31845.4	15645.4	9246.83
12.86_372.3468m/z	372.347	12.8639	pos	3-oxo-docosanoic acid	LMFA01060142	Lipids and lipid-like molecules	Fatty Acyls	Fatty Acids and Conjugates			46.2	37.6	M+NH4	C22H42O3	-1.30659	1.9156	0.0113407	0.116363	3.1494	8.87287	39162.2	4413.7	19631.5	61495.6	29244.3	6874.04	80754.2	36973.8	3967.26	5956.3	3675.4	565.636	6853.57	5464.06
4.48_331.1190m/z	331.119	4.47872	neg	Tupichinol A	LMPK12020006	Lipids and lipid-like molecules	Polyketides	Flavonoids			49	49.4	M+FA-H	C17H18O4	0.869643	1.91505	0.0335364	0.201171	-1.79741	0.287691	17547.3	60993.7	12979.4	14466.8	15524.3	19375.9	29067.7	13869.9	63084.5	137750	22981.4	24818	42939.7	74388
6.65_359.1882m/z	359.188	6.6506	pos	CAY10470	44946	Unclassified	Unclassified	Unclassified			38	0.137	M+H	C22H22N4O	4.3162	1.91044	0.00124019	0.0362366	1.33906	2.52986	49826.2	19695.3	28003.9	69883.9	41367.9	47358.3	58456.2	53887.3	30439	15890.7	20544	27339.8	15276.7	8681.36
11.69_790.5703n	813.56	11.6853	pos	PG(18:0/19:1(9Z))	LMGP04010318	Lipids and lipid-like molecules	Glycerophospholipids	Glycerophosphoglycerols			38.9	2.99	M+H, M+Na	C43H83O10P	-2.61213	1.9092	0.013302	0.12584	29.801	9.35422e+08	36196.9	3.86958e-05	16386.3	33166.1	6947.4	23599.9	89204	47877.7	3.86958e-05	3.86958e-05	3.86958e-05	3.86958e-05	3.86958e-05	3.86958e-05
0.74_189.1234m/z	189.123	0.735883	pos	N-Alpha-acetyllysine	63102	Organic acids and derivatives	Carboxylic acids and derivatives	Amino acids, peptides, and analogues		C12989	52.8	67.1	M+H	C8H16N2O3	0.204029	1.90832	0.0184227	0.149776	-0.821466	0.565867	49934.5	88244.3	43793.7	54292.6	45079.8	46639.8	56621.2	53179.9	86473.9	117169	132515	44779.6	87368.5	61159.8
3.05_415.0056m/z	415.006	3.0529	pos	beta-D-3-[5-Deoxy-5-(dimethylarsinyl)ribofuranosyloxy]-2-hydroxy-1-propanesulfonic acid	HMDB0032686	Organic oxygen compounds	Organooxygen compounds	Carbohydrates and carbohydrate conjugates			36.8	0	M+Na	C10H21AsO9S	10.6083	1.90566	0.0105797	0.111921	29.9317	1.02408e+09	39627.8	3.86958e-05	101484	18912.3	35710.8	33368.1	23510.5	24781.4	3.86958e-05	3.86958e-05	3.86958e-05	3.86958e-05	3.86958e-05	3.86958e-05
11.38_494.3599m/z	494.36	11.3819	pos	1-O-(2-methoxyhexadecyl)-sn-glycerol-3-phosphocholine	LMGP01060042	Lipids and lipid-like molecules	Glycerophospholipids	Glycerophosphocholines			39.7	6.22	M+H-H2O	C25H54NO7P	-1.18315	1.89935	0.00220052	0.0482639	1.76725	3.40405	49951.8	14674.2	61438.9	29571.2	81745.4	37353.5	32828.1	56773.5	19704.3	6565.03	18945	13060.4	20797.8	8972.75
10.17_786.1786n	787.186	10.1653	pos	Kaempferol 3-sophoroside 7-glucuronide	HMDB0038769	Phenylpropanoids and polyketides	Flavonoids	Flavonoid glycosides			37	0	M+H, M+Na, M+NH4, M+H-H2O	C33H38O22	-8.7352	1.89547	0.0395707	0.218547	-0.447617	0.733253	115197	157104	143969	81899.4	107162	126118	162018	70014.1	198009	156664	142741	123414	157991	163801
4.17_397.0641m/z	397.064	4.16913	neg	4-(4-Deoxy-α-D-gluc-4-enuronosyl)-D-galacturonate	63148	Unclassified	Unclassified	Unclassified			38.1	0	M+FA-H	C12H16O12	4.97522	1.88512	4.98834e-06	0.00250874	7.52551	184.249	27394.7	148.683	37096.8	31312.2	32059.1	16866.5	20831.7	26202	270.311	3.86958e-05	233.252	243.117	75.7768	69.6419
5.48_398.1835m/z	398.183	5.48328	pos	N1,N1-dimethyl-4-[[4-(dimethylamino)phenyl](4-nitrophenyl)methyl]aniline	96298	Unclassified	Unclassified	Unclassified			38.1	0	M+Na	C23H25N3O2	-1.19184	1.875	0.0116344	0.117872	1.17424	2.25673	66423.3	29433.4	79759	50406.3	74025.8	78308.9	65427.6	50612.4	72361.8	13405.1	21601.9	50786.5	11181.4	7263.69
6.65_439.1731m/z	439.173	6.6506	pos	Cincassiol B	HMDB0036855	Lipids and lipid-like molecules	Prenol lipids	Diterpenoids	*		40.2	4.4	M+K	C20H32O8	0.640518	1.87473	0.00270696	0.0543685	0.931272	1.90696	65306.2	34246.3	47068.4	74823.3	59032.1	66550.3	69964.5	74398.5	54257.3	27182.8	35964.8	51341.1	22340.2	14391.4
9.19_523.3085m/z	523.308	9.19257	neg	Acutifolane A	LMPR0103520002	Lipids and lipid-like molecules	Prenol lipids	Isoprenoids			41.9	20.5	2M-H	C16H22O3	3.78976	1.87431	0.0211263	0.160399	-1.08307	0.472023	35567.6	75351.5	34535.6	35996.9	25451.2	38075.2	34000	45346.8	33147.1	66481.9	53144.6	136307	79286.8	83741.7
11.97_455.3512m/z	455.351	11.9652	pos	1-O-(2R-hydroxy-docosanyl)-sn-glycerol	LMGL01020068	Lipids and lipid-like molecules	Glycerolipids	Monoradylglycerols			42.3	19.7	M+K	C25H52O4	3.51237	1.87306	0.00549291	0.0789284	3.83311	14.2521	34812.8	2442.64	27363.7	35531.9	12700.9	18602.2	75792.5	38885.8	439.884	1759.37	2764.91	3.86958e-05	3401.46	6290.22
12.71_393.3509m/z	393.351	12.713	pos	22-Dehydroclerosterol	HMDB0034078	Lipids and lipid-like molecules	Steroids and steroid derivatives	Stigmastanes and derivatives	*		41.6	30.3	M+H-H2O	C29H46O	-1.62168	1.87274	0.00239173	0.05054	0.939955	1.91847	70698.2	36851.4	89613.3	64051	96168.9	72170.1	42926	59260	36435.8	28379.5	39652.8	32491.2	43755.6	40393.5
11.50_287.2225m/z	287.222	11.4995	neg	3,12-dihydroxy palmitic acid	LMFA01050083	Lipids and lipid-like molecules	Fatty Acyls	Fatty Acids and Conjugates			46.6	37.8	M-H	C16H32O4	-1.02913	1.87142	0.0465571	0.235227	-3.76843	0.0733822	3568.41	48627.7	814.454	19322.9	983.241	217.138	72.7356	3.86958e-05	86916.1	29439.3	54419.1	119685	858.002	448.274
12.86_456.3234n	479.313	12.8639	pos	(25R)-12alpha-hydroxy-24R,26R-dimethyl-26,27-cyclo-cholest-4-en-3,6-dione	LMST01100012	Unclassified	Unclassified	Unclassified			39.3	11.9	M+H-H2O, M+Na	C29H44O4	-1.2298	1.87095	0.00153468	0.0401573	0.7193	1.64638	78665	47780.5	79251.7	73961.5	57731.1	89455.3	99230.9	72359.7	48872.4	63836.7	51897.4	46302.5	41493.8	34280.4
11.81_535.3041m/z	535.304	11.8102	neg	1-(13Z,16Z-docosadienoyl)-glycero-3-phosphate	HMDB0062306	Lipids and lipid-like molecules	Glycerophospholipids	Glycerophosphates	*		38.7	0.0693	M+FA-H	C25H47O7P	-0.106618	1.86736	0.00949475	0.10641	6.52122	91.8506	34578.1	376.461	20277.5	24678.8	10385.2	20413	79662.3	52052	1115.59	2.31957	341.157	3.86958e-05	68.5859	731.109
9.09_459.3459m/z	459.346	9.08967	pos	5a-Cholestane-3a,7a,12a,25-tetrol	HMDB0000520	Lipids and lipid-like molecules	Glycerophospholipids	Glycerophosphoethanolamines	*		51.8	66.4	M+Na	C27H48O4	3.15359	1.86611	0.00224207	0.0488553	2.10962	4.31578	38665.2	8959.03	40340.5	59970.3	20138.3	22626.9	55695.7	33219.5	2325.22	21495.7	9829.7	7559.71	7047.87	5495.96
11.48_769.5979m/z	769.598	11.4776	neg	DG(20:5(5Z,8Z,11Z,14Z,17Z)/24:1(15Z)/0:0)	HMDB0007587	Lipids and lipid-like molecules	Glycerolipids	Diradylglycerols	*		45.3	33.6	M+FA-H	C47H80O5	-1.20955	1.86553	0.0294946	0.189005	8.1403	282.147	38493.5	136.431	15847.6	26044.8	7592	17314.8	104266	59895.8	223.66	356.626	3.86958e-05	29.9219	3.86958e-05	208.379
11.95_435.3114m/z	435.311	11.9458	neg	Dihomohyocholic acid	LMST04020034	Lipids and lipid-like molecules	Sterol Lipids	Bile acids and derivatives			46.8	39.8	M-H	C26H44O5	-0.463096	1.86353	0.00813044	0.0983396	-1.1357	0.455113	27930	61369.4	29904.9	20477.8	32839.3	13736.9	14395.2	56225.9	70475.3	42536	48676.6	62749.6	94313.6	49465.2
10.61_308.1984n	309.206	10.6125	pos	Corchorifatty acid D	89110	Lipids and lipid-like molecules	Fatty Acyls	Lineolic acids and derivatives	*		55.9	83.7	M+H, M+Na	C18H28O4	-1.04373	1.86062	0.00347717	0.0613162	1.30146	2.46478	57499.6	23328.5	67475.1	35370.3	57574.7	78696.9	42205.3	63675.4	44028.1	11267.7	27029.9	36731.9	13168.2	7745.09
8.64_445.1698m/z	445.17	8.6362	neg	Eremosulphoxinolide A	95915	Lipids and lipid-like molecules	Prenol lipids	Terpene lactones	*		37.7	0	M-H2O-H	C24H32O7S	1.7373	1.85709	7.64322e-05	0.00932992	3.31199	9.93137	29479.9	2968.36	15984.1	35891.1	23101.9	27390.2	44364.2	30148	3123.19	891.909	868.185	2804.22	6461.13	3661.54
12.78_552.4016m/z	552.402	12.7773	pos	LysoPC(20:0)	61700	Lipids and lipid-like molecules	Glycerophospholipids	Glycerophosphocholines	**	C04230	47.7	48.1	M+H	C28H58NO7P	-1.45038	1.84395	0.044495	0.230137	1.71812	3.29008	61599.7	18722.9	137160	55091.5	44396.6	19422.5	83230.1	30297	6064.41	42269.8	27761.1	3.86958e-05	22167.8	14074.1
13.64_397.3553n	380.352	13.6376	pos	C-6 Ceramide	63012	Unclassified	Unclassified	Unclassified			38.5	0	M+H-H2O, M+Na, M+H	C24H47NO3	-0.663093	1.84286	0.0080126	0.0974769	3.60209	12.1433	34863.8	2871.02	21071.1	65061.8	38743.5	2536.36	23827.3	57942.6	3868.96	1939.17	3346.58	2313.54	2412.69	3345.16
0.75_218.0903n	219.098	0.75455	pos	Glutamylalanine	58173	Organic acids and derivatives	Carboxylic acids and derivatives	Amino acids, peptides, and analogues			46	36.6	M+H, M+Na	C8H14N2O5	0.216746	1.83194	0.0437827	0.228282	-0.840415	0.558483	52617	94214.3	55208.9	63851.6	42163	42503.1	73195.7	38779.8	78731.2	127742	56661.9	50460.5	158329	93360.6
12.82_495.2728m/z	495.273	12.8186	neg	8-Epiisoivangustin	HMDB0035708	Lipids and lipid-like molecules	Prenol lipids	Terpene lactones	*		39.5	6.84	2M-H	C15H20O3	-4.8508	1.82814	0.0392738	0.218153	-1.91347	0.265453	14257.7	53710.6	15795.4	4111.07	14714.8	16104.1	28484	6336.49	9847.81	36730.9	35670.1	35346.1	115287	89381.5
13.42_313.2524m/z	313.252	13.4233	pos	7,10,13,16,19-docosapentaenoic acid	LMFA01030184	Lipids and lipid-like molecules	Fatty Acyls	Fatty acids and conjugates	**	C16513	46.2	36.9	M+H-H2O	C22H34O2	-0.651552	1.82564	1.39924e-05	0.00409858	2.88459	7.38498	30448.9	4123.08	43200.6	27628.1	29543.7	20878.7	25230.4	36211.9	4437.73	6414.94	3498.52	5435.59	3383.23	1568.47
7.57_399.1828m/z	399.183	7.57487	neg	Acetylsalvipisone	HMDB0031877	Benzenoids	Naphthalenes	Naphthoquinones			38	0	M+FA-H	C22H26O4	4.16902	1.82078	0.000789324	0.0291032	1.35588	2.55954	46172.8	18039.5	54135.9	55425.2	34118.1	27087.3	43277.5	62992.7	19190.6	21796.2	12081.8	16235.3	24347.7	14585.3
11.97_441.3357m/z	441.336	11.9652	pos	5beta-Cholest-25-ene-3alpha,7alpha,12alpha-triol	LMST04030036	Unclassified	Unclassified	Unclassified			46.8	45.2	M+Na	C27H46O3	4.36713	1.8054	0.00897079	0.103294	0.912539	1.88236	71573	38023.1	74620.5	58836.7	57065.6	92242.1	92744.1	53929	26142.5	50949.1	69177.2	32086.4	26002.8	23780.8
7.85_416.2462m/z	416.246	7.84505	pos	Pregnanalone sulfate (Allopregnanolone sulfate)	3560	Unclassified	Unclassified	Unclassified			38.8	0	M+NH4	C21H34O5S	-0.763455	1.79097	0.000323575	0.0190949	1.48521	2.79958	40793.2	14571.2	24596.7	42837.9	45336.2	36216.3	50365.5	45406.5	19398.5	5680.94	8707.86	10573.2	26534.2	16532.4
6.85_327.1267m/z	327.127	6.84873	neg	Lepidine F	HMDB0033094	Benzenoids	Benzene and substituted derivatives	Biphenyls and derivatives			37.5	0	M-H2O-H	C20H18N4O2	4.65865	1.78589	0.000125184	0.0119238	3.81533	14.0776	27427.7	1948.32	41959.5	31682	13607.5	27149.1	32087.3	18080.7	1433.81	1046.23	2522.39	1706.05	1419.37	3562.05
11.16_402.3498n	425.341	11.1626	pos	5-(16-Heneicosenyl)-1,3-benzenediol	HMDB0039870	Benzenoids	Phenols	Benzenediols			52.2	65.3	M+H, M+Na	C27H46O2	0.163132	1.78195	0.0207918	0.1594	0.630426	1.54802	102826	66424.1	103375	91027.4	109985	106346	97567.6	108655	32935.5	52475.6	68771.6	36989.6	109207	98165.6
10.65_333.2046m/z	333.205	10.6455	neg	2-Dimethylamino-5,6-dimethylpyrimidin-4-ol	68685	Unclassified	Unclassified	Unclassified			38.3	0	2M-H	C8H13N3O	0.405273	1.77807	0.00720461	0.0921501	1.55813	2.94473	48670.3	16527.9	25453.9	38877.1	58113.7	57089.1	27861.7	84626.4	6746.77	16638.7	15053.4	25983.8	21296.3	13448.6
2.31_349.0709m/z	349.071	2.31055	neg	4-(3,4-Dihydroxyphenyl)-2-hydroxy-1H-phenalen-1-one	HMDB0038322	Benzenoids	Naphthalenes	Phenylnaphthalenes			37.5	0.598	M+FA-H	C19H12O4	-2.67774	1.77593	0.00733255	0.0928876	9.02442	520.739	33780.6	64.8704	80535.7	10210	36539.2	30656.5	19668.6	25073.2	90.2053	80.7432	3.86958e-05	105.378	56.3198	56.5763
9.65_401.3373m/z	401.337	9.64847	pos	N-oleoyl threonine	LMFA08020108	Lipids and lipid-like molecules	Fatty Acyls	Fatty amides			50.3	56	M+NH4	C22H41NO4	-0.135898	1.77354	0.0475642	0.237368	-2.53858	0.172112	8295.24	48196.9	9709.06	7291.32	5601.25	6989.25	11573.9	8606.72	28589	12025.2	13585.4	119299	82505.1	33177.8
6.74_444.2775m/z	444.278	6.74157	pos	Oxatomide	HMDB0240225	Benzenoids	Benzene and substituted derivatives	Diphenylmethanes			38.3	1.45	M+NH4	C27H30N4O	4.10941	1.77171	0.00617769	0.0841974	2.17455	4.51443	36036.2	7982.44	24613.8	57447.1	14625.8	24412.2	60744.5	34373.7	4776.92	4051.56	3341.64	4699.17	17874.4	13151
6.39_407.2801m/z	407.28	6.39228	neg	3alpha,12alpha,16alpha-Trihydroxy-5beta-cholan-24-oic Acid	LMST04010111	Unclassified	Unclassified	Unclassified			40.3	8.2	M-H	C24H40O5	-0.460802	1.76914	0.00763704	0.095164	-0.825608	0.564244	39197.8	69469.5	43969.9	31420.2	31771.5	54949.7	46502.9	26572.4	49495.6	74132.1	89770.7	45268	67264.2	90886.4
11.45_455.3142m/z	455.314	11.4466	pos	7alpha,12alpha,26-trihydroxycholest-4-en-3-one	LMST04030158	Lipids and lipid-like molecules	Steroids and steroid derivatives	Bile acids, alcohols and derivatives	*		41.5	15.3	M+Na	C27H44O4	2.39833	1.76637	0.0258306	0.177469	2.84318	7.17599	38850.7	5413.98	17332	33567.6	8956.6	25313.1	92840.9	55094	207.497	8107.07	624.353	360.482	11711.5	11473
15.15_468.9930m/z	468.993	15.1478	neg	Pamidronate	HMDB0014427	Organic acids and derivatives	Organic phosphonic acids and derivatives	Bisphosphonates		C07395	39.9	7.3	2M-H	C3H11NO7P2	-3.87983	1.75678	0.0130786	0.124479	-0.265886	0.831688	158154	190161	158496	156602	162253	156603	158657	156316	190976	201740	160066	158039	220042	210101
4.86_243.1598m/z	243.16	4.86215	neg	2-lauroleic acid	LMFA01030037	Lipids and lipid-like molecules	Fatty Acyls	Fatty acids and conjugates	*		43.3	20.3	M+FA-H	C12H22O2	-1.93211	1.75247	0.0302302	0.19121	-1.542	0.343408	18661.3	54341.3	31727.8	3780.09	15689.7	24589.5	28491.9	7688.56	55438.8	15198.7	31250.5	58660.8	54050.8	111448
8.25_499.3163m/z	499.316	8.25357	pos	PS(P-16:0/0:0)	LMGP03070003	Lipids and lipid-like molecules	Glycerophospholipids	Glycerophosphoserines			41.9	34.2	M+NH4	C22H44NO8P	4.29681	1.74743	0.0034747	0.0613162	1.393	2.62623	42961.6	16358.7	25996.4	62028.8	37484.3	32081.2	58670.1	41509.1	6456.43	17435	12159.9	7884.02	27570.7	26645.9
7.55_543.2551m/z	543.255	7.54767	neg	Perindopril glucuronide	1796	Unclassified	Unclassified	Unclassified			39	0	M-H	C25H40N2O11	-1.58354	1.74717	0.0362792	0.209238	-1.18355	0.440266	27837.8	63229.4	22750.3	13043.1	16141.5	59094.8	42085.8	13911.2	71185.8	62541.9	109375	74451.4	19257.8	42565.2
13.42_245.1896m/z	245.19	13.4233	pos	10E,16-heptadecadien-8-ynoic acid	LMFA01030475	Lipids and lipid-like molecules	Fatty Acyls	Fatty Acids and Conjugates			44.2	29.5	M+H-H2O	C17H26O2	-1.60342	1.74593	3.93801e-05	0.00692483	2.24584	4.74313	30969.9	6529.42	44131.7	28555.3	26073.1	20853.9	28076.5	38128.7	5483.61	8234.1	6490.9	7376.45	5825.4	5766.04
11.70_297.2433m/z	297.243	11.698	neg	2,6,8,12-Tetramethyl-2,4-tridecadien-1-ol	LMFA05000170	Lipids and lipid-like molecules	Fatty Acyls	Fatty alcohols			41	8.91	M+FA-H	C17H32O	-1.05473	1.74534	0.0381426	0.215149	0.83242	1.78067	80711.9	45326.7	48131.7	90980.6	44701.7	119097	62454.9	118906	60403.9	31289.7	48068.9	27251.6	51515.8	53430.4
13.19_342.3365m/z	342.336	13.1881	pos	N,N,N-trimethyl-sphingosine	53957	Lipids and lipid-like molecules	Sphingolipids	Sphingoid bases			49.7	54.1	M+H	C21H43NO2	-0.519811	1.73938	0.00153997	0.0402166	2.97072	7.83925	31720	4046.31	25509.8	16842.3	33928.8	16464.3	41901.3	55673.7	9254	4331.42	6291.1	4084.91	316.42	3.86958e-05
5.81_237.1128m/z	237.113	5.80658	neg	2-(2-Hydroxy-4-methylphenyl)-3-pentanone	HMDB0038180	Lipids and lipid-like molecules	Prenol lipids	Monoterpenoids	*		50.5	56.9	M+FA-H	C12H16O2	-2.30453	1.73423	0.0087919	0.102355	-2.67816	0.156241	5495.21	35171.4	10366.2	4008.45	3630.73	4458.38	7371.92	3135.55	15105.6	65399.8	22707.4	12705.5	57199	37911.3
10.22_553.3159m/z	553.316	10.216	neg	PA(8:0/14:0)	HMDB0115485	Lipids and lipid-like molecules	Glycerophospholipids	Glycerophosphates			38.9	0	M+FA-H	C25H49O8P	2.33038	1.72581	0.020518	0.158217	2.68497	6.43069	36832.2	5727.57	28963	32946.6	11000.2	18829.6	88010.9	41243	3961.82	15172.2	4870.23	7495.17	2134.38	731.611
3.69_285.0670n	284.06	3.68837	neg	7-Aminoclonazepam	HMDB0041817	Organoheterocyclic compounds	Benzodiazepines	1,4-benzodiazepines			36.4	9.37	M-H, M+FA-H	C15H12ClN3O	0.308696	1.72425	0.000406414	0.0208251	3.87766	14.6991	28539.2	1941.56	43535.2	12539.2	41282.8	20355.3	20960	32562.7	2597.26	1524.77	1853.19	3309.67	1132.96	1231.53
4.10_526.0572n	525.05	4.10337	neg	(4-{7-[3,5-dimethoxy-4-(sulfooxy)phenyl]-6,11-dihydroxy-2,8-dioxatricyclo[7.3.1.0⁵,¹³]trideca-1(13),4,6,9,11-pentaen-3-ylidene}cyclohexa-2,5-dien-1-ylidene)oxidanium	HMDB0134845	Unclassified	Unclassified	Unclassified			47.7	54.8	M-H, M+FA-H	C25H18O11S	0.375145	1.7225	0.0130385	0.124224	-7.00928	0.00776239	245.828	31669	3.86958e-05	3.86958e-05	2.50274	3.86958e-05	1472.46	3.86958e-05	93.8307	52027.3	219.023	33673.9	48205.9	55794.4
12.86_423.3253m/z	423.325	12.8639	pos	5-(12,15-Heneicosadienyl)-1,3-benzenediol	HMDB0039871	Benzenoids	Phenols	Benzenediols			41.9	19	M+Na	C27H44O2	4.8139	1.71679	0.00389976	0.0653755	1.31247	2.48366	45623.2	18369.4	38961	57544.6	48750.6	52071	49836.4	26575.6	21511.6	24970	41179.8	13426.7	5664.11	3463.97
13.60_468.1817m/z	468.182	13.5986	neg	NVP-BEZ235	64764	Unclassified	Unclassified	Unclassified			37.9	0	M-H	C30H23N5O	-2.82771	1.71505	0.0469689	0.23598	0.595469	1.51096	105065	69535.2	53574.3	108963	122354	106785	113653	125061	47959.5	68497.8	47028.8	50341.5	117979	85404.7
10.26_899.5136m/z	899.514	10.2603	neg	Laserpitin	67891	Unclassified	Unclassified	Unclassified			37.4	0	2M-H	C25H38O7	-2.92485	1.70566	0.0112517	0.115704	-3.80205	0.0716917	2287.07	31901.4	1598.7	749.194	4150.22	3128.54	4095.77	3.86958e-05	11590.7	66838	12441.7	13380.9	50466.7	36690.7
12.35_457.3670m/z	457.367	12.3523	pos	Trametenolic acid B	HMDB0035511	Lipids and lipid-like molecules	Prenol lipids	Triterpenoids	*		49.4	54.2	M+H	C30H48O3	-1.40198	1.70372	0.00171092	0.0423869	2.90947	7.51342	29357	3907.27	30142	25118.2	13859.3	18452.4	55075.6	33494.5	2893.18	2045.68	2792.11	2371.48	6977.1	6364.09
12.46_327.2890m/z	327.289	12.4558	pos	Lesquerolic acid	35494	Lipids and lipid-like molecules	Fatty Acyls	Fatty Acids and Conjugates			44.8	30.1	M+H	C20H38O3	-1.26415	1.70272	0.00154954	0.0403779	1.23031	2.34617	46164.4	19676.5	59357.8	43030.1	28552.1	63252.3	30601.1	52192.9	26300.4	18264.8	21860.1	16086.2	18209.7	17337.6
3.92_271.1655m/z	271.165	3.91552	pos	3-Indolecarboxylic acid	6660	Organoheterocyclic compounds	Indoles and derivatives	Indolecarboxylic acids and derivatives	*	C19837	39.4	0	M+NH4	C13H19NO4	1.02489	1.70175	0.00030227	0.0183072	1.18731	2.27727	43759.8	19215.9	57050.7	43129.3	38358.2	43345.8	36961.9	43712.8	30639.2	14455.5	26837.1	21913.9	12288	9161.42
9.80_840.4639m/z	840.464	9.8049	pos	Loquatifolin A	HMDB0030434	Organic oxygen compounds	Organooxygen compounds	Carbohydrates and carbohydrate conjugates			37.6	0	M+NH4	C39H66O18	6.26951	1.70032	5.93099e-05	0.00842602	-4.50642	0.043998	1048.97	23841.2	729.424	1650.83	871.395	378.653	2111.65	551.847	29269.2	24305	23905.9	19375.7	35396.4	10795.3
11.35_342.2646m/z	342.265	11.3463	neg	Palmitoleoyl Ethanolamide	HMDB0013648	Organic nitrogen compounds	Organonitrogen compounds	Amines			38.5	1.76	M+FA-H	C18H35NO2	-1.21627	1.69787	0.000920703	0.031464	-0.918053	0.529223	28265.1	53408.6	18854.1	26326.6	25853.9	36981.7	28617.2	32956.9	64710.8	49483.5	42918.3	60675.9	64927.4	37735.9
13.02_567.4628m/z	567.463	13.015	neg	TG(10:0/a-13:0/8:0)[rac]	HMDB0071443	Lipids and lipid-like molecules	Glycerolipids	Triradylcglycerols	*		39	0	M-H	C34H64O6	-0.305069	1.6957	0.0499516	0.24338	1.10967	2.15797	69216.2	32074.7	73019.7	55464.9	56841	60585.5	35077.4	134308	46268.5	17342.3	27349	70171.9	21436.4	9880.35
7.99_284.0926m/z	284.093	7.99313	neg	2,3-bis (4-Hydroxyphenyl) Propionitrile	45149	Unclassified	Unclassified	Unclassified			39.4	0	M+FA-H	C15H13NO2	-0.816878	1.69445	0.0261951	0.178693	3.51692	11.4472	36901.3	3223.61	68710.8	2950.46	9858.56	45319.2	76673.1	17895.8	11788.4	891.851	3768.14	2595.72	251.215	46.3598
8.41_471.3112m/z	471.311	8.41072	neg	Stoloniferone A	LMST01031071	Lipids and lipid-like molecules	Sterol Lipids	Sterols			43	21	M+FA-H	C28H42O3	-0.917468	1.6942	0.0287248	0.186776	1.17202	2.25326	54678	24266.1	34626.6	82005.5	47670.6	25941.6	71641.5	66182.3	4375.35	38506.1	11040.5	6651.67	48185.7	36837.4
9.76_470.2510m/z	470.251	9.76125	pos	PS(14:0/0:0)	LMGP03050009	Lipids and lipid-like molecules	Glycerophospholipids	Glycerophosphoserines			50.5	55.3	M+H	C20H40NO9P	-0.73803	1.69278	0.0473624	0.236822	-2.78704	0.144883	5987.97	41329.7	6217.18	6940.17	7977.72	3969.26	8876.87	1946.64	17070.4	36876.9	7954.53	11761.2	103052	71263
5.42_299.0913m/z	299.091	5.41585	pos	4'-Hydroxy-5,7-dimethoxy-4-phenylcoumarin	LMPK12100047	Unclassified	Unclassified	Unclassified			51.8	62.7	M+H	C17H14O5	-0.414275	1.6907	1.21422e-05	0.00369865	1.98357	3.95471	29216.4	7387.74	27562.3	31368.5	24248.4	31717.7	29578.6	30822.6	14486.2	4109.14	11043.4	12670.2	1256.58	760.949
11.56_391.3353m/z	391.335	11.5563	pos	3-Deoxyvitamin D3	LMST03020618	Lipids and lipid-like molecules	Sterol Lipids	Secosteroids			44.8	34.1	M+Na	C27H44	4.95162	1.68858	0.00590092	0.0818953	0.97021	1.95913	56743.4	28963.6	39794.7	55445.6	58356.8	74287.5	65904.4	46671.3	38768.5	16703.2	54751.8	23486	23489.5	16582.9
14.99_458.9893m/z	458.989	14.9945	neg	[2,6-dihydroxy-3-(3,5,6,7-tetrahydroxy-4-oxo-4H-chromen-2-yl)phenyl]oxidanesulfonic acid	HMDB0129448	Phenylpropanoids and polyketides	Flavonoids	Flavones			36.3	5.41	M+FA-H	C15H10O12S	4.46325	1.68808	0.00927109	0.105175	-0.278036	0.824713	133874	162328	135918	132679	139848	133348	124399	137051	161248	164489	135234	142313	187617	183065
13.55_535.2701m/z	535.27	13.5536	pos	Pyrophaeophorbide a	HMDB0031150	Organoheterocyclic compounds	Tetrapyrroles and derivatives	Chlorins			41.2	13.3	M+H	C33H34N4O3	-0.457261	1.6852	0.0296043	0.189247	1.15593	2.22827	60883.5	27323.2	81731	77826.4	70482.1	63982.8	32950.8	38327.9	28775.5	5695.9	35665.4	10929.7	72565.5	10307
13.53_398.2823n	421.271	13.5319	pos	17beta-Hydroxyestr-4-en-3-one cyclopentanepropionate	70195	Unclassified	Unclassified	Unclassified			39.7	5.44	M+H, M+Na	C26H38O3	0.435593	1.6838	0.00213268	0.0475006	2.40903	5.31117	31971.9	6019.74	20211.6	22245.4	24572.8	58922.8	36441.3	29437.3	8727.57	2625.37	12014	12218	533.523	3.86958e-05
5.60_577.4182m/z	577.418	5.59633	pos	gamma-Chaconine	HMDB0033678	Lipids and lipid-like molecules	Steroids and steroid derivatives	Steroidal glycosides	*		36.3	0	M+NH4	C33H53NO6	-5.2051	1.68165	0.0385307	0.21603	-0.298181	0.813277	144372	177519	151368	139536	147924	134869	150237	142301	192488	214958	139392	144016	211753	162509
6.02_341.1968m/z	341.197	6.02215	neg	Tanacetol B	HMDB0035075	Lipids and lipid-like molecules	Prenol lipids	Sesquiterpenoids	*		45.9	35.7	M+FA-H	C17H28O4	-0.638597	1.68011	0.0129048	0.123696	-0.823627	0.56502	37634.1	66606.7	49544.7	35124.4	28079	39574.2	40734.8	32747.3	47716.3	46827.4	71454.3	48269.4	89767.4	95605.3
8.24_445.1700m/z	445.17	8.23592	neg	Corchoionoside B	HMDB0030975	Lipids and lipid-like molecules	Fatty Acyls	Fatty acyl glycosides	*		38.6	0.632	M+FA-H	C19H28O9	-3.85271	1.67788	0.000359863	0.019991	2.5311	5.78013	27452.3	4749.43	15298.6	29554.3	19522.8	27228.5	45046.1	28063.7	4723.43	1937.89	3026.02	4215.17	9091.09	5503
12.02_547.2884n	546.281	12.0188	neg	PS(20:3(8Z,11Z,14Z)/0:0)	LMGP03050022	Lipids and lipid-like molecules	Glycerophospholipids	Glycerophosphoserines			39.8	12.5	M-H, M+FA-H	C26H46NO9P	-4.836	1.67744	0.0178121	0.146902	0.786983	1.72546	73628	42671.5	94113.6	83274.2	100567	72224.3	42315.5	49274	55869.2	41564.5	28924.9	26909.8	49390.3	53370.1
13.15_368.3167m/z	368.317	13.1458	neg	Arachidoyl glycine	62991	Unclassified	Unclassified	Unclassified			40.6	9.67	M-H	C22H43NO3	-0.811403	1.67277	0.0165251	0.141052	0.767833	1.70271	74332.8	43655.6	74576.6	72902.1	95599.6	85404.4	56967.3	60546.7	61182.3	18435	56976.3	68007.4	38255.2	19077.2
11.07_252.2086n	253.216	11.0747	pos	7,10-hexadecadienoic acid	5467	Lipids and lipid-like molecules	Fatty Acyls	Fatty Acids and Conjugates			48.7	47.4	M+H-H2O, M+H	C16H28O2	-1.14983	1.65354	0.0129336	0.12385	0.857223	1.81155	64917.9	35835.6	39698.3	50473.6	59271.9	93259.2	63645.4	83158.8	56761.4	20439	37163.1	30972.8	40702.9	28974.4
0.75_421.1451m/z	421.145	0.75455	pos	2,4-Dihydroxy-7,8-dimethoxy-2H-1,4-benzoxazin-3(4H)-one 2-glucoside	92407	Organic oxygen compounds	Organooxygen compounds	Carbohydrates and carbohydrate conjugates			38.6	0	M+NH4	C16H21NO11	-0.457347	1.65021	0.000907485	0.0313701	6.39068	83.9047	22492.2	268.068	22241.4	36511.4	2978.44	21102.8	32388	19731.2	116.185	518.507	524.949	47.5687	401.201	3.86958e-05
6.98_387.2388m/z	387.239	6.97602	neg	methyl 9,12-dihydroxy-13-oxo-10-octadecenoate	LMFA01050149	Lipids and lipid-like molecules	Fatty Acyls	Fatty Acids and Conjugates			39.4	2.88	M+FA-H	C19H34O5	-0.190078	1.649	0.000467831	0.0222696	-1.37574	0.385354	14093.8	36573.7	20707.2	15149.2	10508.1	13572.1	13432.9	11193.5	30594.2	41011	54912	30069.8	35320.6	27534.4
12.84_356.3155m/z	356.316	12.8422	pos	N-palmitoyl valine	75502	Lipids and lipid-like molecules	Fatty Acyls	Fatty amides			45	33.3	M+H	C21H41NO3	-1.18268	1.64785	0.000143789	0.0125111	0.651518	1.57082	60857.5	38742.5	64594.7	65354	64520.5	56295.7	53957.4	60422.8	47595.5	31304.4	41642.1	45648.8	37996.9	28267.4
12.18_449.2659m/z	449.266	12.182	pos	15(S)-15-methyl PGF2α isopropyl ester	64688	Unclassified	Unclassified	Unclassified			38.6	0	M+K	C24H42O5	-1.06183	1.64678	0.0193868	0.153592	-1.07379	0.475069	25941.7	54606.1	31116.5	15703.1	34556.5	25230.5	38565.3	10478.3	38888.7	76351.4	34359.8	35905	87782.4	54349.3
4.69_268.1675n	269.175	4.68632	pos	3,11,12-Trihydroxy-1(10)-spirovetiven-2-one	HMDB0038154	Lipids and lipid-like molecules	Prenol lipids	Sesquiterpenoids	*		51.7	62.1	M+H-H2O, M+Na, M+H	C15H24O4	0.311251	1.63895	0.0271404	0.181893	0.666232	1.58692	81682.1	51472	103482	84519.5	71964.1	73392.3	78761.3	77973.2	74525.8	29555.8	64111.9	84979.3	25227.1	30432
11.63_663.3572m/z	663.357	11.6317	neg	desferrioxamine G	LMFA08020171	Lipids and lipid-like molecules	Fatty Acyls	Fatty amides			44.8	29.1	M+FA-H	C27H50N6O10	0.174407	1.63534	0.0134666	0.126628	1.07517	2.10697	54706.2	25964.4	51046	51912.7	55115.5	71233.5	47118.2	51811.2	39205.1	24483	58589.6	29492.7	2660.64	1355.53
11.30_441.3359m/z	441.336	11.2952	pos	3alpha-Hydroxy-5beta-cholestan-26-oic acid	LMST04030054	Unclassified	Unclassified	Unclassified			49.8	58.7	M+Na	C27H46O3	4.80058	1.62834	0.00572705	0.0804785	1.53919	2.90631	37697.6	12971	31520.4	37656.9	18136.8	28670.3	66504.4	43696.9	5743.55	19400.5	14232.4	8100.76	15755.8	14592.8
8.80_330.2402n	353.23	8.79895	pos	5,8,12-TriHOME(9)	74691	Lipids and lipid-like molecules	Fatty Acyls	Octadecanoids			47.1	39.7	M+H, M+Na, M+H-H2O	C18H34O5	-1.13781	1.6272	0.0425174	0.225448	-0.953914	0.51623	32908.2	63747.2	34831	21051.9	24704.7	54890.9	30757.8	31213.3	49670	54408.5	116543	80201.9	31118.6	50541.6
6.67_483.1643m/z	483.164	6.6655	neg	Limonexic acid	HMDB0036075	Lipids and lipid-like molecules	Prenol lipids	Triterpenoids	*		44.4	37.9	M-H2O-H	C26H30O10	-3.49533	1.62367	0.00610015	0.0834446	0.65319	1.57264	67303.3	42796.4	52646.1	75975.6	69276.7	59931.6	69970.2	76019.8	63988.5	33340.5	31142.2	56974.8	42547.2	28785
10.69_483.3112m/z	483.311	10.686	neg	Ganolucidic acid E	HMDB0037607	Lipids and lipid-like molecules	Prenol lipids	Triterpenoids	*		42.4	20.2	M-H	C30H44O5	-0.88979	1.61904	0.0067245	0.0888006	4.0486	16.5482	26725.8	1615.03	17156.8	19008.3	11452.4	17871.7	59456	35409.4	885.536	3.86958e-05	2012.2	3.86958e-05	5710.01	1082.43
10.59_312.2298n	295.227	10.59	pos	9(S)-HpODE	36019	Lipids and lipid-like molecules	Fatty Acyls	Lineolic acids and derivatives	**	C14827	52.7	67.6	M+H-H2O, M+H	C18H32O4	-0.82005	1.61812	0.00274701	0.0545361	0.793167	1.73287	59370.9	34261.5	47270.6	49424.6	67034.8	71460.8	42563.4	78471.1	30012.9	29889.5	34487.4	41506.5	38487.6	31185.2
11.69_439.2258m/z	439.226	11.6853	pos	Latrunculin A	64706	Unclassified	Unclassified	Unclassified			39.1	0	M+NH4	C22H31NO5S	-0.647281	1.61078	0.00956822	0.106887	0.988063	1.98352	53276.9	26859.7	38961.5	56405.5	41028	76062.1	35617	71587	40797.3	19751.5	38789.2	18344.9	23669.8	19805.8
5.32_239.1284m/z	239.128	5.32362	neg	4-Hydroxypropofol	HMDB0014018	Benzenoids	Benzene and substituted derivatives	Cumenes			50.7	58.5	M+FA-H	C12H18O2	-2.62939	1.60908	0.00159269	0.0410767	1.88037	3.6817	30567.1	8302.44	35265.1	48039.4	19868.8	19459.8	20047.9	40721.6	10862.6	7677.13	11851.3	6979.53	5960.68	6483.38
6.88_345.2281m/z	345.228	6.88407	neg	MG(0:0/14:1(9Z)/0:0)	HMDB0011531	Lipids and lipid-like molecules	Glycerolipids	Monoradylglycerols	*		48.2	43.9	M+FA-H	C17H32O4	-0.454615	1.60676	0.0216518	0.162461	-1.25834	0.418025	21113.4	50507.4	21360.9	18169.6	9245.75	13312.8	52109.4	12481.8	17049.2	33668.1	58565.3	64405.3	54641.7	74714.7
6.31_327.1678m/z	327.168	6.31105	pos	Tyrosyl-Glutamine	HMDB0029103	Organic acids and derivatives	Carboxylic acids and derivatives	Amino acids, peptides, and analogues			40.8	12.8	M+NH4	C14H19N3O5	4.79657	1.60037	0.015972	0.138398	2.50723	5.68528	32080.5	5642.73	13332.3	36118.7	58934.8	8067.79	56148.2	19881.1	3468.82	14529.7	5653.55	5914.61	2426.66	1862.98
12.50_581.4420m/z	581.442	12.5	neg	DG(13:0/17:2(9Z,12Z)/0:0)[iso2]	LMGL02010358	Lipids and lipid-like molecules	Glycerolipids	Diradylglycerols			46.1	34.4	M+FA-H	C33H60O5	-0.4718	1.58985	0.00649714	0.0869028	3.26979	9.64505	28743.1	2980.09	25586.3	19847.3	29056.8	26371.5	8778.47	62818.5	6050.23	1006.34	3256.73	6939.39	367.768	260.095
14.75_183.0098m/z	183.01	14.7485	pos	(3-ethenylphenyl)oxidanesulfonic acid	HMDB0124988	Organic acids and derivatives	Organic sulfuric acids and derivatives	Arylsulfates			36.3	0	M+H-H2O	C8H8O4S	-6.01808	1.58947	0.000377482	0.0202418	-0.153783	0.89889	195767	217788	196738	209046	195012	182861	194636	196312	217743	226114	213431	209501	217067	222871
10.49_464.2782m/z	464.278	10.4942	neg	PC(14:2(Z)l8,8/0:0)[U]	40281	Unclassified	Unclassified	Unclassified			38.7	0	M-H	C22H44NO7P	-0.232392	1.5808	0.00897545	0.103294	-1.73306	0.300812	10520.9	34975.1	26405.8	3513.04	9212.58	13639.1	8735.7	1619.4	24746	39243.7	19234	19221.5	53055.7	54349.8
13.17_217.1949m/z	217.195	13.1663	pos	(+)-Vulgraon B	53475	Lipids and lipid-like molecules	Prenol lipids	Isoprenoids			47.9	43	M+H	C16H24	-0.625928	1.57978	0.024208	0.170993	0.7113	1.63728	72624.9	44357.1	49633.6	66521.2	78656.2	104088	66627.9	70221.9	66037.7	26041.5	60400.9	56843.7	33189.6	23628.9
3.82_784.1500m/z	784.15	3.81773	neg	FAD	HMDB0001248	Nucleosides, nucleotides, and analogues	Flavin nucleotides	Unclassified	***	C00016	53.6	71.1	M-H	C27H33N9O15P2	0.205279	1.5724	0.00301744	0.0571828	-1.46918	0.361188	13172.6	36470.3	8438.24	19792.2	17516.8	9521.6	11899.1	11867.7	36148.2	47314.3	22612.9	16611	47041.2	49094
1.15_118.0421n	136.076	1.15357	pos	Benzofuran	70116	Organoheterocyclic compounds	Benzofurans	Unclassified		C14512	46.3	34.2	M+H, M+NH4	C8H6O	1.8456	1.57045	0.00870664	0.101989	0.625024	1.54224	65752.2	42634.3	53927.5	86100.1	68163.1	62023.8	64948.7	59349.8	33506.3	65898.9	26759.5	41101.1	47233.6	41306.4
7.49_359.2801m/z	359.28	7.48832	neg	11-methoxy-octadecanoic acid	LMFA01080027	Lipids and lipid-like molecules	Fatty Acyls	Fatty Acids and Conjugates			41.8	14.6	M+FA-H	C19H38O3	-0.773034	1.56533	0.00143536	0.0391419	-1.96252	0.256581	7540.72	29389.3	7357.07	4727.86	6018.5	8556.08	13350.4	5234.36	19287.2	43876.6	19469.1	19107.3	31639.6	42955.8
6.45_432.2414m/z	432.241	6.44805	pos	Undecylprodigiosin	69260	Unclassified	Unclassified	Unclassified			38.9	0	M+K	C25H35N3O	0.666845	1.56344	0.0144734	0.131247	0.984142	1.97814	46341.5	23426.9	27457.8	78867.3	35468.3	41705.4	51905.4	42644.9	28267.2	18637.9	15383.4	20829.8	32865.5	24577.4
13.42_391.3354m/z	391.335	13.4233	pos	N-Octadecyl-N'-propyl-sulfamide	64680	Unclassified	Unclassified	Unclassified			37.9	0	M+H	C21H46N2O2S	0.228759	1.56158	3.17939e-06	0.00190355	2.58761	6.01102	22296.1	3709.19	29075.8	24414.4	21465.7	17210.8	16778.8	24830.8	4562.89	5468.01	2626.95	3305.2	2428.4	3863.71
10.87_503.3379m/z	503.338	10.8679	neg	Hydroxypelenolide	HMDB0036663	Lipids and lipid-like molecules	Prenol lipids	Terpene lactones	*		45.5	38.6	2M-H	C15H24O3	0.151623	1.55844	2.38068e-05	0.00516073	1.60937	3.05118	29409.2	9638.63	32095.2	23635.7	36631.7	28091.7	24569	31431.8	5469.15	5134.34	15539.6	7356.77	13409.7	10922.2
11.86_326.3051m/z	326.305	11.8607	pos	9Z,12Z-Octadecadienyl acetate	LMFA07010394	Lipids and lipid-like molecules	Fatty Acyls	Fatty esters			44.8	26.7	M+NH4	C20H36O2	-0.885862	1.55771	0.000264487	0.0173198	0.692419	1.61599	53260.9	32958.7	53029.5	49345.4	50491.9	42821.5	63299.8	60577.5	31571.7	40083.4	37339.4	28286.5	32972.4	27498.8
13.81_577.4819m/z	577.482	13.8116	pos	DG(15:0/18:3(9Z,12Z,15Z)/0:0)	HMDB0007076	Lipids and lipid-like molecules	Fatty Acyls	Lineolic acids and derivatives	*		39.4	4.35	M+H	C36H64O5	-1.22911	1.55679	0.0168799	0.142821	-2.33102	0.198744	6495.05	32680.5	7290.28	5909.71	5227.31	9663.72	3131.04	7748.24	62934.8	10588.6	30870.7	56570.1	22559.4	12559.4
9.92_633.3989m/z	633.399	9.9182	pos	Cloversaponin I	HMDB0039892	Lipids and lipid-like molecules	Prenol lipids	Terpene glycosides	*		56.1	85.1	M+H	C36H56O9	-1.24686	1.55084	0.0233319	0.16869	4.34002	20.2524	26148.9	1291.15	12493.7	31979.9	8647.59	9748.03	68458.8	25565.3	545.494	2794.26	2348.68	1561.34	497.134	3.86958e-05
12.22_738.5211n	761.511	12.2239	pos	PA(19:0/20:4(5Z,8Z,11Z,14Z))	LMGP10010470	Lipids and lipid-like molecules	Glycerophospholipids	Glycerophosphates			44.1	28.2	M+H, M+Na	C42H75O8P	1.56315	1.54863	0.0303694	0.191636	1.18472	2.27319	44432.7	19546.4	18911.4	81367	53738.4	41815.1	35821.1	34943	35655.5	13045.5	22941.6	27122.2	3366.58	15147.1
9.15_293.1759m/z	293.176	9.14775	neg	7,10-hexadecadiynoic acid	LMFA01030492	Lipids and lipid-like molecules	Fatty Acyls	Fatty Acids and Conjugates			53.3	70.3	M+FA-H	C16H24O2	0.416513	1.54533	0.0236937	0.169648	-0.464936	0.724503	69486.8	95909.6	68567.1	60087	68496.1	61542.7	96646.6	61581.5	113051	79929.2	100985	63453.2	105598	112442
6.39_489.2132m/z	489.213	6.39228	neg	Deacetylnomilinic acid	HMDB0035073	Lipids and lipid-like molecules	Steroids and steroid derivatives	Steroid lactones	*		39.2	5.96	M-H	C26H34O9	0.328652	1.54178	0.000378761	0.0202418	2.31779	4.98569	23686.4	4750.88	8691.48	33431.2	22180	20989.5	30158.8	26667.5	5594.38	4656.65	5709.78	5456.83	5355.03	1732.6
13.94_393.3513m/z	393.351	13.9419	pos	stigmasta-5,22E,25-trien-3beta-ol	LMST01040132	Unclassified	Unclassified	Unclassified			36.8	9.85	M+H-H2O	C29H46O	-0.690375	1.53895	3.30324e-05	0.00615283	0.870784	1.82866	41583	22739.6	50580.1	45170.7	42579	39918.5	32173	39076.6	23365.5	22125.9	25817.1	23290.6	21880.3	19958.4
5.74_797.3758m/z	797.376	5.73913	neg	OHOOA-PI	LMGP20050031	Lipids and lipid-like molecules	Glycerophospholipids	Oxidized glycerophospholipids			38.2	0	M+FA-H	C35H61O15P	3.72435	1.53808	0.028164	0.185358	1.86681	3.64726	38391.9	10526.2	56208.1	14719.2	33335	51096.1	63160.8	11832	40993.3	3.86958e-05	2834.67	6376.62	8781.18	4171.55
10.55_291.1951m/z	291.195	10.5456	pos	16-J1-PhytoP	LMFA02030067	Lipids and lipid-like molecules	Fatty Acyls	Octadecanoids			54.3	76.5	M+H-H2O	C18H28O4	-1.22582	1.52344	0.0137352	0.127449	0.523055	1.43699	79244.4	55145.9	66084.9	88306.1	92260.8	71132.3	59015.1	98666.9	51367	72650.8	53452.4	65321	42152.4	45931.8
10.50_313.2733m/z	313.273	10.5007	pos	1-O-(2R-methoxy-4Z-pentadecenyl)-sn-glycerol	LMGL01020047	Lipids and lipid-like molecules	Glycerolipids	Monoradylglycerols			41.7	13.6	M+H-H2O	C19H38O4	-1.25418	1.52146	0.0186441	0.150519	-1.29418	0.407769	17155.2	42070.9	18685.2	14483.7	22117.9	18740.2	18214.4	10690	32414.3	78969.1	22268.8	23353.5	44020.3	51399.6
4.73_179.1067m/z	179.107	4.7316	pos	2-Phenylpropyl acetate	71847	Unclassified	Unclassified	Unclassified			53.3	70.7	M+H	C11H14O2	0.121659	1.51839	0.00407743	0.0667519	1.14325	2.20879	40960.9	18544.5	68421	37049.3	34990.6	38195	36575.2	30534.3	22645.2	9659.4	23433.3	23076.8	14372.9	18079.7
11.70_537.3203m/z	537.32	11.698	neg	1-(11Z-docosenoyl)-glycero-3-phosphate	HMDB0062304	Lipids and lipid-like molecules	Glycerophospholipids	Glycerophosphates	*		39.7	4.62	M+FA-H	C25H49O7P	1.05321	1.51249	0.0353714	0.207331	1.03117	2.04369	50889.2	24900.7	33250.3	42277.4	36507.3	44281.2	93982.2	55036.6	18043	16581.4	14930.3	15893.3	46318.4	37637.5
7.57_400.1893n	401.197	7.57192	pos	Melleolide	90951	Lipids and lipid-like molecules	Prenol lipids	Sesquiterpenoids	*		42.4	21.2	M+H, M+Na	C23H28O6	1.71595	1.51215	4.95411e-06	0.00250874	1.80325	3.49005	24114.5	6909.52	22631	26671.7	23382.9	17436.7	26036.8	28528.2	10720.4	5963.21	3792.3	5858.41	9796.07	5326.76
0.73_324.0937m/z	324.094	0.731767	neg	N-Glycolylneuraminic acid	HMDB0000833	Organic oxygen compounds	Organooxygen compounds	Carbohydrates and carbohydrate conjugates	**	C03410	43.6	24.2	M-H	C11H19NO10	0.111432	1.50957	0.0254887	0.176313	-2.03113	0.244664	8362.61	34180	9427.3	7441.19	6160.38	7432.57	11118.9	8595.3	18513	33169.8	11716.6	14360.1	61415.6	65905
7.32_517.3277m/z	517.328	7.32177	pos	LysoPA(i-22:0/0:0)	HMDB0114769	Lipids and lipid-like molecules	Glycerophospholipids	Glycerophosphates			46.7	47.3	M+Na	C25H51O7P	2.42723	1.50217	0.0137114	0.127398	0.515504	1.42949	72538.1	50744	62118.4	94408.8	62678.2	66819.1	79006.8	70197.7	70153.8	42936.2	57762.2	55712.2	43756.8	34142.5
5.00_381.1917m/z	381.192	4.99507	neg	12-Oxo-20-trihydroxy-leukotriene B4	LMFA03020050	Lipids and lipid-like molecules	Fatty Acyls	Eicosanoids	*		48.5	49.6	M-H	C20H30O7	-0.552656	1.50121	2.59944e-06	0.00172014	1.49628	2.82115	26640.2	9443.04	32890.6	27156.7	26838.8	24270.7	25204.9	23479.8	10975.7	4193.35	12654.9	10484.9	9583	8766.33
11.99_365.2306m/z	365.231	11.9906	neg	2alpha,3alpha-(Difluoromethylene)-5alpha-androstan-17beta-ol acetate	70795	Unclassified	Unclassified	Unclassified			38.1	0	M-H	C22H32F2O2	2.16448	1.49995	0.036946	0.211818	1.3884	2.61787	42851.8	16368.9	28782.7	28282.3	16327.1	41845.5	63103.6	78769.5	16267.8	3032.88	6594.56	8646.4	29755.5	33916.6
10.26_538.1875m/z	538.187	10.2603	neg	Acrimarine N	HMDB0040791	Organoheterocyclic compounds	Quinolines and derivatives	Benzoquinolines			40.6	11.3	M-H2O-H	C32H31NO8	0.649922	1.49833	0.000377222	0.0202418	-1.79916	0.287341	7493.02	26077.1	8043.33	3810.98	10786.5	10096.5	9365.08	2855.72	20802.8	36417.8	16990.1	20118.6	34051.7	28081.6
11.15_564.3326m/z	564.333	11.1545	neg	PC(18:2(2E,4E)/0:0)	LMGP01050034	Lipids and lipid-like molecules	Glycerophospholipids	Glycerophosphocholines			38.1	3.08	M+FA-H	C26H50NO7P	3.71454	1.49723	0.0125011	0.12204	1.22952	2.3449	41511.2	17702.8	24983.1	28783.8	45386.9	59750.9	53556.5	36605.9	11310.1	12671.4	40845.1	26410.7	6066.56	8912.74
9.18_343.3225m/z	343.322	9.17687	pos	Propylene glycol stearate	HMDB0029764	Lipids and lipid-like molecules	Fatty Acyls	Fatty acid esters	*		37.8	0	M+H	C21H42O3	5.26267	1.49241	0.0132322	0.125419	10.0941	1093.02	25316.4	23.1618	27868.2	8957.46	62893.5	25099	4541.75	22538.1	27.5024	3.86958e-05	18.4256	38.9885	34.6077	19.4462
6.65_517.3276m/z	517.328	6.6506	pos	LysoPA(22:0/0:0)	HMDB0114749	Lipids and lipid-like molecules	Glycerophospholipids	Glycerophosphates	*		47.5	50	M+Na	C25H51O7P	2.29143	1.48803	0.0255833	0.176692	0.538635	1.4526	71335.4	49108.9	56465.1	101883	55041.3	68505.9	82546.1	63571	61802	38114.9	52832.8	55542.4	51463.6	34897.6
4.00_285.0672n	308.057	4.00362	pos	Faropenem	HMDB0041892	Organic acids and derivatives	Carboxylic acids and derivatives	Amino acids, peptides, and analogues		C13310	41.1	11.8	M+H, M+K, M+Na	C12H15NO5S	0.532065	1.48719	0.00430962	0.0688936	6.11716	69.4143	22787.7	328.285	49138.2	8299.65	30088.1	19424	18695.4	11080.6	499.78	207.126	453.559	570.949	35.8514	202.446
4.49_651.2672m/z	651.267	4.48525	neg	Crocin 3	HMDB0039121	Lipids and lipid-like molecules	Prenol lipids	Diterpenoids	*		46.5	40.6	M-H	C32H44O14	2.12864	1.48653	0.00466947	0.0728235	0.950295	1.93227	41086.7	21263.5	40015.4	46555.4	26824.9	33275.1	55820.2	44029.3	24975.3	11036.5	9273.91	27308.8	28135.5	26850.8
7.39_230.1516n	231.159	7.38997	pos	Bis(1-methylethyl) hexanedioate	HMDB0041613	Lipids and lipid-like molecules	Fatty Acyls	Fatty acid esters	*	C14523	41.4	10.3	M+H-H2O, M+H	C12H22O4	-1.04117	1.4853	0.000151031	0.0127911	0.90954	1.87845	37040.9	19718.9	31927.6	43981.2	34512.6	41160.3	36684.7	33979.1	26040.5	12481.9	19835	26141	17908.5	15906.6
4.84_236.0715n	235.064	4.83975	neg	2-(4'-Methylthio)butylmalic acid	64497	Unclassified	Unclassified	Unclassified			37.6	0	M-H, 2M-H	C9H16O5S	-1.32453	1.4835	0.00106076	0.0335382	2.22355	4.67041	22920.4	4907.57	7749.8	33965.5	17351.6	24299.8	29122.6	25033	7657.18	4507.86	4863.99	8786.13	2368.02	1262.28
9.99_445.3039m/z	445.304	9.98553	pos	3,4-Dimethyl-5-pentyl-2-furanpentadecanoic acid	HMDB0112081	Lipids and lipid-like molecules	Fatty Acyls	Fatty acids and conjugates			36.9	0	M+K	C26H46O3	-9.71998	1.48276	0.0122446	0.121079	1.83546	3.56884	32118.9	8999.8	38314	23388.7	38315.6	5806.85	53138.5	33749.5	5243.55	27005.6	11095.4	4533.79	3451.07	2669.36
14.40_553.3884m/z	553.388	14.4018	pos	Furohyperforin	HMDB0033632	Lipids and lipid-like molecules	Prenol lipids	Monoterpenoids	*		38.5	0.299	M+H	C35H52O5	-0.66856	1.48198	1.34572e-06	0.00125332	2.17551	4.51745	21148.9	4681.6	23252.6	22967.3	22257.9	24093.7	19365.9	14956.2	8045.14	3129.6	5004.89	5555.1	3474.39	2880.51
11.86_287.2942m/z	287.294	11.8607	pos	iso-1,2-octadecanediol	46026	Lipids and lipid-like molecules	Fatty Acyls	Fatty alcohols			41	8.8	M+H	C18H38O2	-0.82442	1.47668	0.0220234	0.163992	1.323	2.50185	40448.5	16167.4	70209.5	42774.9	16112	23959.5	38640.6	50994.8	22929.9	28729	21841.7	15895.4	4617.68	2991.03
6.27_466.3290n	465.322	6.27433	neg	TetraHCA	HMDB0062534	Lipids and lipid-like molecules	Steroids and steroid derivatives	Bile acids, alcohols and derivatives	*		46.2	35.4	M-H, M+FA-H	C27H46O6	-0.982655	1.46189	0.0257743	0.177403	-2.08241	0.23612	7186.24	30434.7	4541.64	6431.52	9456.95	9019.85	7516.85	6150.62	24302.9	38974.9	70212.6	15193.2	11305.9	22618.7
10.68_485.3256m/z	485.326	10.6789	pos	21-Hydroxyisoglabrolide	94244	Lipids and lipid-like molecules	Prenol lipids	Triterpenoids	*		49.2	53.6	M+H	C30H44O5	-1.13347	1.46161	0.0062609	0.0849928	3.09999	8.57415	22875.2	2667.92	16288.2	18129.1	9924.84	14458.6	48663.9	29786.2	751.2	3183.09	2750.41	1491.29	2265.69	5565.84
4.58_208.1100n	191.107	4.57877	pos	12-oxo-5E,8E,10Z-dodecatrienoic acid	74733	Lipids and lipid-like molecules	Fatty Acyls	Fatty Acids and Conjugates			51.1	58.5	M+H-H2O, M+H	C12H16O3	0.417952	1.46101	0.0243836	0.171703	0.723335	1.65099	62738.3	38000.3	95779.8	52052	50010.1	56394.1	68739.4	53454.5	46683.5	22098.7	47170.3	57112.9	34092.9	20843.7
5.80_369.2251m/z	369.225	5.79712	pos	Floionic acid	LMFA01170030	Lipids and lipid-like molecules	Fatty Acyls	Fatty Acids and Conjugates			39.8	4.77	M+Na	C18H34O6	1.10785	1.46086	0.0100066	0.108882	-0.980021	0.506973	22285	43957	25312.2	21184.8	17490.2	22023.1	29781.9	17917.8	26610	35694.4	40093.6	33553.5	65770.6	62020.1
12.67_339.1478m/z	339.148	12.6666	neg	F-Amidine	96435	Unclassified	Unclassified	Unclassified			39.2	0	M+FA-H	C14H19FN4O2	1.34168	1.45903	0.0472722	0.236653	0.541302	1.45528	85210.3	58552.3	82624.8	89213.2	98750.5	95430.6	57744.3	87498.4	78200.1	49033.2	66947.4	92003.7	38994.9	26134.6
10.63_357.2784m/z	357.278	10.6343	pos	(6E,9E,12E,15E,18E,21E)-tetracosa-6,9,12,15,18,21-hexaenoic acid	LMFA01030924	Lipids and lipid-like molecules	Fatty Acyls	Fatty Acids and Conjugates			46.3	37.2	M+H	C24H36O2	-1.24301	1.45872	0.0458645	0.233416	-0.567863	0.674615	53172.1	78818.4	55599.6	40046.6	54526.4	52063.9	68435.6	48360.5	58978.5	128560	66803.3	63894.1	69513.2	85161.1
6.67_429.1561m/z	429.156	6.6655	neg	Kanzonol N	HMDB0041100	Phenylpropanoids and polyketides	Isoflavonoids	O-methylated isoflavonoids			40.4	9.51	M+FA-H	C22H24O6	1.56827	1.45507	0.00145584	0.0392794	1.46495	2.76054	27866.6	10094.6	12655.7	34958.9	24528.9	25847.2	37142	32067.1	11340.2	7301.95	3620.24	10296.1	17129.9	10879.3
1.41_266.0893m/z	266.089	1.40672	neg	3-Deoxyguanosine	4149	Unclassified	Unclassified	Unclassified			50.1	54.1	M-H	C10H13N5O4	-0.546374	1.45377	0.0370622	0.212136	-1.18917	0.438556	20528.2	46808.5	15895.1	18314.3	16956.4	15571	24507.8	31924.6	60504	62582.5	9384.48	80929.7	29706.8	37743.9
8.41_473.3255m/z	473.326	8.409	pos	(3beta,17alpha,23R)-17,23-Epoxy-3,29-dihydroxy-27-norlanost-8-ene-15,24-dione	HMDB0035112	Lipids and lipid-like molecules	Prenol lipids	Triterpenoids	*		55	78.4	M+H	C29H44O5	-1.35155	1.44772	0.0309525	0.194167	0.965973	1.95338	46285.2	23694.9	31519.1	68758.8	43705	23156	51366	59206	6186.15	41233.3	18150.5	11253.4	35236.2	30109.9
5.96_193.0862m/z	193.086	5.96157	neg	3-Hydroxyphenyl-valeric acid	HMDB0041666	Lipids and lipid-like molecules	Fatty Acyls	Fatty acids and conjugates	*		48.3	48.6	M-H	C11H14O3	-4.22637	1.44713	0.00306275	0.0575175	-1.16385	0.446319	15829.6	35467.1	7880.83	12333.3	15505	18456.8	19095.3	21706.6	52480.1	38425.8	22755.3	24960.3	31358.8	42822.3
7.76_490.3289n	489.322	7.75657	neg	9,11alpha-epoxy-6alpha-acetoxy-cholest-7-en-3beta,5alpha,19-triol	LMST01010293	Unclassified	Unclassified	Unclassified			45	34.5	M-H2O-H, M-H	C29H46O6	-1.09078	1.4464	0.0451195	0.232077	1.34021	2.53188	42890.9	16940.4	37068.6	58357.7	67631.7	13211.7	16306.9	64769	4365.47	12039.9	16517.9	5667.29	40768.3	22283.2
12.29_386.2911m/z	386.291	12.2943	neg	3-hydroxytetradecanoyl carnitine	HMDB0061640	Lipids and lipid-like molecules	Fatty Acyls	Fatty acid esters	*		42.5	18.6	M-H	C21H41NO5	-0.242537	1.44248	0.00606124	0.0832419	2.42895	5.38502	24603.6	4568.88	32941.8	18929.5	15816.4	11390	48609.2	19934.4	4659.8	10814.2	3618.92	2500.56	3635.48	2184.31
3.04_274.0331m/z	274.033	3.04127	neg	5-Phosphoribosylamine	HMDB0001128	Organic oxygen compounds	Organooxygen compounds	Carbohydrates and carbohydrate conjugates	**	C03090	42.5	19.1	M+FA-H	C5H12NO7P	-0.877818	1.44081	0.0114491	0.116771	-1.40573	0.377428	13186.6	34938.1	25048.7	10229.8	5745.08	10892.2	15934	11269.9	54296.1	30278.7	6666.98	41414.9	39643.2	37328.7
10.26_316.2245m/z	316.224	10.2554	pos	3-Oxotetradecanoic acid glycerides	94395	Unclassified	Unclassified	Unclassified			39.3	0	M+H-H2O	C17H33O6-	0.149533	1.43975	0.0244476	0.171817	-0.295841	0.814597	99527.4	122180	80983.8	94376.1	106366	92779.9	104878	117781	122014	119369	146825	98644.5	113065	133162
11.97_436.3550n	435.348	11.9681	neg	5b-Cholestane-3a,7a,12a,23-Tetrol	HMDB0001968	Lipids and lipid-like molecules	Steroids and steroid derivatives	Bile acids, alcohols and derivatives	*		45.5	34.6	M-H, M+FA-H	C27H48O4	-0.688562	1.43795	0.0337316	0.201716	-0.826284	0.56398	32662.5	57914.3	20234.5	53349.3	26586.9	20263.4	33390.6	42150.4	44830.4	79330.2	88758.9	52544.3	33315.7	48706.1
5.73_241.1429m/z	241.143	5.73052	pos	Caproylcholine	HMDB0013224	Organic nitrogen compounds	Organonitrogen compounds	Quaternary ammonium salts			38.8	0.755	M+K	C11H24NO2+	-4.81742	1.43517	0.00105373	0.0335306	0.826105	1.77289	41658	23497.2	43345.7	39867.3	41711.9	41322	43960.5	39740.8	34555.9	15240.6	30677.6	30428	18855.5	11225.6
6.47_430.2257m/z	430.226	6.4712	pos	17α,20β-Hydroxyprogesterone sulfate	3562	Unclassified	Unclassified	Unclassified			38.5	0	M+NH4	C21H32O6S	-0.317681	1.43162	0.000417885	0.0210584	1.34498	2.54027	27483.4	10819.1	18792.4	30862	22049.7	32729.3	32606	27861.2	10466.9	5204.18	5877.54	9885.03	19386	14095
10.75_358.3676m/z	358.368	10.7459	pos	Behenic acid	HMDB0000944	Lipids and lipid-like molecules	Fatty Acyls	Fatty acids and conjugates	**	C08281	41.5	12.4	M+NH4	C22H44O2	-1.19088	1.42886	0.0425413	0.225448	-0.649811	0.637364	42172.5	66167.1	49382.1	35977.3	39586.3	47682.1	32479.6	47927.7	86760.2	85025	33764.1	51311.6	90866.5	49275.1
14.99_244.9849m/z	244.985	14.9945	neg	Octafluorocyclobutane	HMDB0031292	Organohalogen compounds	Organofluorides	Unclassified			42.2	15.9	M+FA-H	C4F8	-2.43194	1.42773	0.014545	0.131634	-0.229326	0.853033	124195	145593	126296	125080	129817	122511	117377	124093	143902	152116	123295	127633	163125	163485
5.89_439.2803m/z	439.28	5.88878	pos	DG(8:0/0:0/12:0)	HMDB0092904	Lipids and lipid-like molecules	Glycerolipids	Diradylglycerols	*		38.6	0.0443	M+K	C23H44O5	-4.27499	1.42729	0.0216583	0.162461	2.95999	7.78119	28766.2	3696.89	36670.9	5132.67	59250	30077	703.282	40763.2	7013.06	1263.34	2710.43	9614.78	984.135	595.583
4.84_249.1097m/z	249.11	4.84113	pos	Sapidolide A	HMDB0041582	Organoheterocyclic compounds	Lactones	Gamma butyrolactones			36.4	0	M+H-H2O	C14H18O5	-9.26999	1.42721	0.0126696	0.122867	1.00611	2.00849	43207.2	21512.2	72978.6	43450.5	31117.2	42742.8	31846.3	37108.1	28912.6	8772.06	28927	27334.9	16712	18414.9
6.84_553.3745m/z	553.375	6.83748	neg	Fasciculol C	HMDB0035853	Lipids and lipid-like molecules	Prenol lipids	Triterpenoids	*		42.8	18.8	M+FA-H	C30H52O6	-0.128432	1.42569	0.00192139	0.0449135	1.46753	2.76549	30045.7	10864.5	24664.9	22653.5	30231.5	32218.4	25029.5	45476.1	12322.6	10675	25035.3	6409.88	5774.94	4969.32
12.84_418.3446n	417.337	12.8403	neg	7-a,25-Dihydroxycholesterol	HMDB0006280	Lipids and lipid-like molecules	Prenol lipids	Retinoids	**	C16678	39.3	5.19	M-H, M+FA-H	C27H46O3	-0.128125	1.42221	0.00553493	0.0792153	-0.707577	0.612348	30639.8	50036.6	19110.6	29292	26660.4	26915.3	29200.3	52660.4	39378.6	52837.3	53814.8	55040	56580.4	42568.8
4.19_323.1613m/z	323.161	4.19012	neg	keratan sulfate I	HMDB0062483	Benzenoids	Phenol ethers	Anisoles			42.5	15.7	M+FA-H	C15H22N2O3	0.0871466	1.42049	5.80284e-05	0.00833818	1.55281	2.93388	24739.3	8432.27	27097.4	22205.6	25661.7	23363.4	23838.3	26269.1	15766.1	5423.41	12776.9	11668.4	2767.5	2191.27
11.51_413.2924n	414.3	11.5121	pos	N-gamma-linolenoyl dopamine	LMFA08020273	Lipids and lipid-like molecules	Fatty Acyls	Fatty amides			40.1	12.2	M+H, M+Na	C26H39NO3	-1.3472	1.41731	0.0102765	0.11	0.950796	1.93294	41776.5	21612.9	34073.5	41777.1	25421.9	48800.1	44362	56224.3	16479.8	36694.2	26837.3	29833.2	12455.1	7377.97
5.76_257.0816m/z	257.082	5.76158	neg	Lactucin	HMDB0035814	Organoheterocyclic compounds	Lactones	Gamma butyrolactones		C09489	49.2	50.4	M-H2O-H	C15H16O5	-1.06924	1.41224	0.0267507	0.180245	-2.53683	0.172321	4705.03	27303.9	3290.89	3018.1	7695.12	9985.04	3381.41	859.643	58538	2256.42	16552	10734.7	36933.6	38808.5
5.00_275.0923m/z	275.092	4.99507	neg	Cyclocalopin F	HMDB0039825	Organoheterocyclic compounds	Furopyrans	Unclassified			49.9	54.1	M-H2O-H	C15H18O6	-0.537831	1.41015	0.0166088	0.141383	2.07774	4.22144	26880.9	6367.71	14432.7	20160.3	14622.5	29334.9	58046.8	24688.2	17249.3	6144.77	7954.79	6515.6	114.831	226.935
3.80_239.1159n	240.123	3.8039	pos	Methyldopate	43257	Phenylpropanoids and polyketides	Phenylpropanoic acids	Unclassified		C07194	39.5	2.24	M+H, M+Na	C12H17NO4	0.601682	1.40765	0.0246388	0.172497	0.904439	1.87182	49865.4	26640.1	76087.2	49006.8	44470.5	46910.8	35851.6	46865.5	27992.6	40586.5	45534	32431.1	6948.64	6347.92
5.69_819.3561m/z	819.356	5.68687	pos	25-O-Desacetylrifampin	2315	Unclassified	Unclassified	Unclassified			37.4	0	M+K	C41H56N4O11	-2.05351	1.40682	0.00173657	0.0426742	3.18293	9.08147	20030.1	2205.6	15203	25955.7	29900.2	19498.2	2606.76	27016.7	4727.97	3397.8	854.624	4253.23	3.86958e-05	3.86958e-05
6.76_375.2752m/z	375.275	6.75857	neg	7-Methyl-3-methylene-1,6,7-octanetriol	LMFA05000635	Lipids and lipid-like molecules	Fatty Acyls	Fatty alcohols	*		38.8	0	2M-H	C10H20O3	-0.165379	1.40506	1.82708e-05	0.00450429	-1.30893	0.403619	10307.6	25538	14162.9	7901.96	9014.03	9894.19	10986.8	9886	21076.2	28187.4	21421.7	22640.7	28228.8	31673.6
1.09_118.0865m/z	118.086	1.09343	pos	L-Valine	35	Organic acids and derivatives	Carboxylic acids and derivatives	Amino acids, peptides, and analogues	**	C00183	50.1	58.7	M+H	C5H11NO2	1.91876	1.40462	0.0381822	0.215267	0.464072	1.37943	84026.1	60913.7	74163.2	85792.2	88313.2	75658.2	97447.5	82782.3	43223.5	80085.3	36829.3	59173.8	94100.4	52069.6
1.09_204.1231m/z	204.123	1.09343	pos	Succinylmonocholine	2522	Unclassified	Unclassified	Unclassified			45	28.5	M+H	C9H17NO4	0.424338	1.40455	0.000576805	0.025094	1.456	2.74346	26756.2	9752.72	25720.4	26879.9	38071.2	18162.3	19410.2	32293.1	10947.8	6512.79	10382.2	13770.2	4313.16	12590.1
8.65_774.4424m/z	774.442	8.65452	pos	PE(14:0/22:6(4Z,7Z,10Z,13Z,16Z,19Z))	HMDB0008847	Lipids and lipid-like molecules	Glycerophospholipids	Glycerophosphoethanolamines	**	C00350	37.9	0	M+K	C41H70NO8P	-6.35421	1.39484	0.0206687	0.158763	1.82809	3.55068	31154.1	8774.13	66837.6	24918.4	31575.7	26184.7	23051.3	14357	11042.9	7916.19	13697.7	19987.9	3.86958e-05	3.86958e-05
10.77_374.3626m/z	374.363	10.768	pos	Phellonic acid	LMFA01050079	Lipids and lipid-like molecules	Fatty Acyls	Fatty Acids and Conjugates			47.7	43.3	M+NH4	C22H44O3	-0.890237	1.3934	0.0139351	0.128592	-0.696717	0.616975	31154.8	50496.1	49530.5	30459.9	32111.6	24464.1	15791.2	34571.8	66941.4	56856.8	48917.1	36655.7	54032.7	39573.3
11.34_494.3228m/z	494.323	11.3398	pos	PC(16:1(9Z)/0:0)[U]	40289	Unclassified	Unclassified	Unclassified			41.7	22.2	M+H	C24H48NO7P	-2.72317	1.39093	0.00700525	0.0908478	-1.12378	0.458888	15444.3	33655.8	23799	9933.44	13806.3	25226.4	12272.6	7627.86	45080.1	18781.6	38887	24377.6	44753.9	30054.7
1.26_163.0858n	164.093	1.26473	pos	6-Dimethylaminopurine	HMDB0000473	Organoheterocyclic compounds	Imidazopyrimidines	Purines and purine derivatives			39.5	5.97	M+H, M+Na	C7H9N5	0.216818	1.38859	1.77325e-06	0.00137596	2.17672	4.52123	18595.2	4112.86	16671	16254.6	16836.7	17726.8	25464	18618.2	4482.3	5396.99	3372.8	3262.58	4848.03	3314.49
6.32_392.1503m/z	392.15	6.32122	neg	GW 9508	45154	Unclassified	Unclassified	Unclassified			39.3	0	M+FA-H	C22H21NO3	-0.0349033	1.387	0.0435642	0.227464	2.35309	5.10919	30215.5	5913.96	43675	9661.8	46552.9	942.275	65775.3	14685.8	13663.6	3777.95	6095.56	1488.21	6664.54	3793.92
6.20_480.3086n	479.301	6.20368	neg	inokosterone	LMST01010194	Lipids and lipid-like molecules	Sterol Lipids	Sterols		C08819	49.3	53.4	M-H, M+FA-H	C27H44O7	-0.148243	1.38651	0.0289818	0.187491	-1.49286	0.355307	12235.8	34437.2	5685.08	9777.65	14543.1	22471.2	10792.4	10145.4	21593.6	67764	31482.1	46795.6	8790.8	30197.1
11.77_363.2880m/z	363.288	11.7728	pos	Polyoxyethylene (600) monoricinoleate	HMDB0032476	Lipids and lipid-like molecules	Fatty Acyls	Fatty alcohols	*		47.3	43.5	M+Na	C21H40O3	3.09455	1.38613	0.0145727	0.131755	-1.21249	0.431522	14825.5	34356.4	12002.3	17030.2	16925.2	9908.69	10421.8	22665.1	32468.4	36074.8	63974.9	22626	28301.5	22692.7
10.48_466.2924m/z	466.292	10.4784	pos	PE(17:1(9Z)/0:0)	46714	Lipids and lipid-like molecules	Glycerophospholipids	Glycerophosphoethanolamines			46.1	40.5	M+H	C22H44NO7P	-0.997053	1.38531	0.00517113	0.0763105	-2.58656	0.166483	3656.91	21965.7	6292.82	1702.25	3168.66	4367.03	5529	881.721	15121.8	33970.2	9514.84	7958.27	33411.5	31817.7
11.38_434.2660m/z	434.266	11.3819	pos	PC(O-11:1(10E)/2:0)	LMGP01020146	Lipids and lipid-like molecules	Glycerophospholipids	Glycerophosphocholines			39.1	2.84	M+H-H2O	C21H42NO7P	-1.24122	1.38517	0.000606237	0.0256206	1.66425	3.16948	23483.9	7409.37	13727.5	22224.1	17075.6	32612.4	25397	29866.5	10113.6	4076.49	5955.85	12733.8	5185.91	6390.62
9.42_638.1629n	661.152	9.42248	pos	Isoscoparin 2''-O-ferulate	LMPK12110761	Lipids and lipid-like molecules	Polyketides	Flavonoids			44.3	25.8	M+H-H2O, M+NH4, M+Na, M+H	C32H30O14	-1.09474	1.38223	0.0173343	0.144998	-0.493756	0.710174	49440.2	69617	52879.3	33361.5	36341	66291.1	67678.3	40089.8	82152.1	75591.3	66409.8	61370.1	60403.1	71775.8
11.35_510.2832m/z	510.283	11.3463	neg	PS(17:0/0:0)	LMGP03050030	Lipids and lipid-like molecules	Glycerophospholipids	Glycerophosphoserines			42.3	19.1	M-H	C23H46NO9P	-1.10706	1.37857	0.0312674	0.194863	-1.09728	0.467396	19036.5	40728.8	27144.9	20299.4	26301.3	14909.8	12007.6	13556	35711.7	76514.3	28793.1	19215.8	34277.1	49860.9
5.58_299.0948m/z	299.095	5.58357	neg	{[(2Z)-2-[(3-hydroxyphenyl)methylidene]heptyl]oxy}sulfonic acid	HMDB0126529	Benzenoids	Phenols	1-hydroxy-4-unsubstituted benzenoids			41.1	15.2	M-H	C14H20O5S	-3.57757	1.37587	0.00971556	0.107588	1.24585	2.37158	30431.5	12831.7	25687.3	42363.6	11379.2	28598.2	48422.9	26137.9	12196.5	13093.4	15635.1	16376.8	11112.1	8576.6
11.41_543.3687m/z	543.369	11.4122	neg	Tsugaric acid A	HMDB0032022	Lipids and lipid-like molecules	Prenol lipids	Triterpenoids	*		45.9	34	M+FA-H	C32H50O4	-0.761752	1.37576	9.0791e-05	0.00978928	2.12279	4.35534	20629.4	4736.59	24978.5	16976.2	27457.7	23371.1	13511.4	17481.7	5091.87	2671.05	10597	3734.81	3422.2	2902.57
5.47_342.0736n	341.066	5.46702	neg	7,3'-Dihydroxy-5,4'-dimethoxy-6-formyl-4-phenylcoumarin	LMPK12100037	Unclassified	Unclassified	Unclassified			47.4	42.6	M-H, M+FA-H	C18H14O7	-0.926532	1.37438	0.0203948	0.157557	-2.58753	0.16637	4188.45	25175.6	1923.84	10276.2	2287.51	3439.76	3680.32	3523.08	42095.8	3434.23	42905.7	39643.6	15946.5	7027.53
3.94_335.1438m/z	335.144	3.93823	pos	Lipoyllysine	HMDB0012996	Organoheterocyclic compounds	Dithiolanes	Lipoamides			36.9	0	M+H	C14H26N2O3S2	-5.91985	1.3739	0.00140711	0.038816	2.64642	6.2611	21351	3410.1	37327	7474.83	23445.5	25017.8	17834.2	17006.6	4918.56	1179.21	3796.33	4356.81	2345.62	3864.07
5.46_369.2249m/z	369.225	5.46038	pos	9-hydroperoxy-12,13-dihydroxy-10-octadecenoic acid	LMFA02000107	Lipids and lipid-like molecules	Fatty Acyls	Octadecanoids			37.9	6.73	M+Na	C18H34O6	0.539153	1.37148	0.0491371	0.24114	-0.84476	0.556803	29368.8	52745.4	31916.4	28855.6	21441.5	23155.9	45547.4	25296.1	27402.3	70824.4	38484.6	35191.9	90190.5	54378.7
1.09_278.1245m/z	278.124	1.09343	pos	Queuine	6279	Organoheterocyclic compounds	Pyrrolopyrimidines	Pyrrolo[2,3-d]pyrimidines		C01449	45.3	33.9	M+H	C12H15N5O3	-1.13002	1.36723	1.01907e-05	0.00363107	1.67914	3.20237	21151.7	6605.02	20675	18504.8	20312.6	18293.2	20400.5	28724.3	5732.97	4507.79	5222.46	10176.7	7951.2	6039.04
11.79_345.1820m/z	345.182	11.7947	pos	11-Hydroxyandrosterone	LMST02020086	Lipids and lipid-like molecules	Steroids and steroid derivatives	Androstane steroids	*	C14606	36.7	1.79	M+K	C19H30O3	-2.07541	1.3668	0.00900444	0.10336	5.29163	39.1688	18683.8	477.009	11339.6	14035.4	6175.86	10347	42575.8	27629.5	431.206	549.571	250.549	264.506	561.52	804.701
10.66_498.2562m/z	498.256	10.6566	pos	LysoPE(18:3(6Z,9Z,12Z)/0:0)	HMDB0011508	Lipids and lipid-like molecules	Glycerophospholipids	Glycerophosphoethanolamines	*		37.3	0	M+Na	C23H42NO7P	-6.16564	1.36497	0.0048508	0.0738815	-1.26625	0.415738	12675.7	30489.8	13443.5	8656.2	14205.4	15781.2	17772.5	6195.61	27651.7	35479.9	15148.2	20513.8	41105.3	43039.7
12.61_282.2558n	305.247	12.6089	pos	(Z)-13-Octadecenoic acid	HMDB0041480	Lipids and lipid-like molecules	Fatty Acyls	Fatty acids and conjugates	*		50.5	55.2	M+H, M+Na	C18H34O2	-0.228018	1.36318	0.0105457	0.111703	0.722236	1.64974	49173.1	29806.7	35576.2	53395.1	65843	55009.6	33430.8	51784.2	20979.4	30361	29934.4	21941.2	45060.4	30563.6
9.83_470.2253m/z	470.225	9.82708	pos	Ac-Ser-Asp-Lys-Pro-OH	HMDB0062552	Organic acids and derivatives	Carboxylic acids and derivatives	Amino acids, peptides, and analogues			43.6	27.1	M+H-H2O	C20H33N5O9	1.58424	1.36181	0.00017767	0.0139097	-3.44118	0.0920667	1540.46	16732	1962.95	1568.76	1955.85	1301.73	2096.17	357.285	17992.6	14644	9140.78	11973.2	27324.3	19317
12.37_391.3355m/z	391.336	12.3748	pos	24-Norursa-3,12-dien-11-one	265083	Unclassified	Unclassified	Unclassified			38.9	0	M+H-H2O	C29H44O	-1.03959	1.35875	0.000261153	0.0172361	1.09563	2.13707	29320.2	13719.8	25343.9	28274.9	30856.3	37846.4	22347.7	31252	11521	12585.7	20310.7	17775.9	11501.7	8623.9
10.28_346.3312m/z	346.331	10.278	pos	20-hydroxy-eicosanoic acid	LMFA01050075	Lipids and lipid-like molecules	Fatty Acyls	Fatty Acids and Conjugates			44.8	28.6	M+NH4	C20H40O3	-1.23744	1.35863	0.00410991	0.0669719	-0.921939	0.527799	18715.8	35460.1	26012.4	15834.1	17026.5	18844.1	12903.3	21674.4	33794.4	32014.4	32382.3	23352.5	53696.2	37520.7
10.61_752.4503m/z	752.45	10.6125	pos	PS(15:1(9Z)/17:2(9Z,12Z))	LMGP03010171	Lipids and lipid-like molecules	Glycerophospholipids	Glycerophosphoserines			44.4	31.4	M+Na	C38H68NO10P	4.06118	1.35664	0.031276	0.194863	-2.99735	0.12523	3014.08	24068.4	1118.12	6307.56	2093.29	2863.45	1384.08	4317.97	28726.5	38567.8	50647	26469	3.86958e-05	3.86958e-05
5.11_285.0800m/z	285.08	5.10645	neg	Ethofumesate	72594	Unclassified	Unclassified	Unclassified			38.9	1.74	M-H	C13H18O5S	-0.811532	1.35497	0.00278958	0.0551026	4.88355	29.5185	16683.2	565.178	18130.6	19564.4	3354.69	14656.7	33368.8	11024	742.019	539.201	192.714	750.306	364.69	802.135
12.46_393.2995m/z	393.299	12.4558	pos	3alpha,19-Dihydroxy-5beta-cholan-24-oic Acid	LMST04010255	Unclassified	Unclassified	Unclassified			45.2	37.1	M+H	C24H40O4	-1.22729	1.35372	0.0210705	0.16025	-1.94483	0.259746	7124.3	27427.9	16061.4	11072.4	901.967	3652.08	5518.18	5539.84	20740.7	6710.28	25057.3	15806.2	44098.9	52154.3
9.26_436.3179n	481.317	9.25827	neg	Dihomocholic acid	LMST04020030	Lipids and lipid-like molecules	Sterol Lipids	Bile acids and derivatives			42.6	20.7	M-H, M+FA-H	C26H44O5	-2.25409	1.35265	0.0414868	0.223581	-4.4971	0.0442831	1023.16	23104.9	1350.57	3.86958e-05	239.314	3035.58	1510.36	3.11801	15155.3	21719.6	44637.2	56371.4	3.86958e-05	745.867
4.09_303.0063m/z	303.006	4.0912	pos	Endothion	72741	Unclassified	Unclassified	Unclassified			39.4	0	M+Na	C9H13O6PS	0.205478	1.35166	0.0413494	0.223281	-4.27939	0.0514962	1192.52	23157.4	1374.95	598.755	1123.03	1459.22	1722.33	876.823	380.732	50926.4	1805.67	6082.48	44696.8	35052.3
8.50_804.4546m/z	804.455	8.50102	neg	Solacauline	HMDB0029373	Lipids and lipid-like molecules	Steroids and steroid derivatives	Steroidal glycosides	*		38.1	0	M-H2O-H	C43H69NO14	0.800224	1.34455	0.0163522	0.140387	1.35293	2.5543	30457.3	11923.9	13848.9	38377.3	37332.3	36886	34788.7	21510.7	15475.9	5039.63	26414.2	24613.8	3.86958e-05	3.86958e-05
12.46_314.3049m/z	314.305	12.4558	pos	R-Palmitoyl-(2-methyl) Ethanolamide	62966	Unclassified	Unclassified	Unclassified			48.2	50.7	M+H	C19H39NO2	-1.61278	1.34227	0.00237154	0.0503247	2.23037	4.69253	21019.5	4479.36	37273.6	23946	17046.2	7867.08	18494.2	21490.2	2015.33	4673.97	8410.01	5967.73	1079.67	4729.46
10.86_469.3302m/z	469.33	10.8565	pos	3,21-dioxoolean-18-en-28-oic acid	LMPR0106150018	Lipids and lipid-like molecules	Prenol lipids	Isoprenoids			41.8	17.6	M+H	C30H44O4	-2.21011	1.33992	0.00746582	0.0937232	4.08422	16.9619	18131.3	1068.94	15053.4	16167.1	7215.06	9438.08	41861	19052.9	61.1636	877.073	80.1036	93.023	1657.75	3644.54
10.63_277.2160m/z	277.216	10.6343	pos	beta-kamlolenic acid	LMFA02000157	Lipids and lipid-like molecules	Fatty Acyls	Octadecanoids			48.5	47.1	M+H-H2O	C18H30O3	-0.828071	1.33754	0.0102611	0.109959	0.815273	1.75963	44131.6	25080	33510.2	36539.4	56179.9	48041.8	29005.2	61513.1	15411.8	20198.8	23014	27049.2	32365.4	32440.9
5.07_608.1132n	631.102	5.06615	pos	Prodelphinidin A1	HMDB0036336	Phenylpropanoids and polyketides	Flavonoids	Biflavonoids and polyflavonoids			37.2	0	M+H, M+Na	C30H24O14	-5.53646	1.33687	0.0193316	0.153389	29.0567	5.58409e+08	21608.1	3.86958e-05	52879.8	3888.06	34093.9	14119.3	4213.93	20453.5	3.86958e-05	3.86958e-05	3.86958e-05	3.86958e-05	3.86958e-05	3.86958e-05
4.88_225.1127m/z	225.113	4.88442	neg	7E,10-undecadien-4-olide	LMFA07040065	Lipids and lipid-like molecules	Fatty Acyls	Fatty esters			43	19.9	M+FA-H	C11H16O2	-2.7549	1.33446	0.00499248	0.0750619	0.631417	1.54909	47405.2	30602.1	60691.7	48136.3	37165.2	46515.5	47661.5	44261.1	38662.2	16217.2	25179.8	34704.6	31258.7	37589.8
7.14_414.2305m/z	414.23	7.13958	pos	3beta-Hydroxypregn-5-en-20-one sulfate	HMDB0060382	Lipids and lipid-like molecules	Steroids and steroid derivatives	Sulfated steroids	**	C18044	42.3	20.2	M+NH4	C21H32O5S	-0.947421	1.33352	0.000193597	0.0144692	2.09177	4.26272	17993.1	4221.04	9884.96	26030.6	14233.2	17531.2	21516	18762.7	7440.82	2537.46	2703.29	4547.9	4637.69	3459.06
12.25_343.2218m/z	343.222	12.2452	pos	15(S)-HETE	HMDB0003876	Lipids and lipid-like molecules	Fatty Acyls	Eicosanoids	**	C04742	37.5	0	M+Na	C20H32O3	-8.02975	1.33225	0.00701891	0.0909781	1.21222	2.31694	30830.1	13306.4	19093.6	34004.1	28406.1	45042.7	16737.1	41696.7	20430.5	10771.7	18527.3	13013.1	10102.8	6992.69
2.77_232.1186m/z	232.119	2.7712	neg	N-n-Hexanoylglycine methyl ester	5799	Unclassified	Unclassified	Unclassified			39.2	0	M+FA-H	C9H17NO3	-2.56023	1.32743	0.0271762	0.181893	1.62962	3.09431	30024.6	9703.16	32720.7	35192.9	15379.5	51087.1	5686.63	40080.6	13078.5	4421.58	24644.6	15327.5	434.368	312.535
10.06_551.3221n	550.315	10.0573	neg	PS(20:1(11Z)/0:0)	LMGP03050020	Lipids and lipid-like molecules	Glycerophospholipids	Glycerophosphoserines			38.9	0.0915	M-H, M+FA-H	C26H50NO9P	-0.412815	1.32223	0.0127252	0.123049	-1.31715	0.401327	12390.2	30873.2	13306	18037.9	14084.6	8654.02	8910.21	11348.7	34539.8	56514.5	28230	29891.2	13210.5	22852.9
10.42_528.3448n	527.337	10.4241	neg	(24E)-3alpha-Acetoxy-15alpha,22S-dihydroxylanosta-7,9(11),24-trien-26-oic acid	HMDB0035335	Lipids and lipid-like molecules	Prenol lipids	Triterpenoids	*		44.1	32.7	M-H, M+FA-H	C32H48O6	-0.621142	1.32202	0.0174844	0.145543	4.03247	16.3642	19259.4	1176.92	14509.4	14232.2	4579.43	13385	49405.8	19444.3	387.612	3628.47	664.315	743.513	1228.1	409.506
1.71_150.0915m/z	150.091	1.71392	pos	1-(3-Pyridinyl)-1,4-butanediol	HMDB0062266	Organoheterocyclic compounds	Pyridines and derivatives	Unclassified	**	C19582	40.7	7.54	M+H-H2O	C9H13NO2	0.70056	1.32012	0.0431244	0.226588	-1.27983	0.411843	14506.1	35222.5	39767.7	5596.05	8566.26	9802.71	15027.7	8276.47	36383.6	18091.9	22239.6	25212	43185.2	66222.6
12.67_400.3065m/z	400.306	12.6666	neg	3-hydroxypentadecanoyl carnitine	HMDB0061641	Lipids and lipid-like molecules	Fatty Acyls	Fatty acid esters	*		41.7	15.2	M-H	C22H43NO5	-0.908533	1.31849	0.000160846	0.0133047	2.2478	4.74959	18215.2	3835.11	18124.2	14997.6	24607.6	9748.37	22747.6	19065.9	8537.15	4077.47	4498.57	3518.42	1483.48	895.588
13.79_619.4550m/z	619.455	13.7895	pos	Muricatetrocin C	HMDB0031395	Lipids and lipid-like molecules	Fatty Acyls	Fatty alcohols	*		39.6	3.71	M+Na	C35H64O7	0.882708	1.31661	0.00549186	0.0789284	1.7603	3.38768	23618.1	6971.75	32693.7	29870.5	15387.7	10368.6	17738.4	35649.4	8347.28	154.746	10346.6	10170.3	11616.5	1195.08
8.24_424.1950n	447.184	8.2375	pos	Benazepril	HMDB0014682	Organic acids and derivatives	Carboxylic acids and derivatives	Amino acids, peptides, and analogues		C06843	36.2	0	M+H-H2O, M+NH4, M+Na	C24H28N2O5	-11.3535	1.31609	8.187e-05	0.00957228	2.56464	5.91608	16048.5	2712.69	10365.6	20314.5	12449.8	17315.9	21961.9	13883.2	2664.24	819.59	860.554	1584.46	6985.04	3362.26
5.08_761.2919m/z	761.292	5.08417	neg	Patellamide C	71066	Unclassified	Unclassified	Unclassified			36.4	0	M-H	C37H46N8O6S2	1.29487	1.31134	0.00136344	0.0382798	1.58534	3.00078	23223.4	7739.11	29231.7	19463.5	23261.8	23468	21998.8	21916.4	22661.3	4032.49	4485.71	10587.5	4173.93	493.768
15.10_619.0212m/z	619.021	15.1046	neg	[2-hydroxy-3-(phenoxycarbonyl)phenyl]oxidanesulfonic acid	HMDB0135171	Phenylpropanoids and polyketides	Depsides and depsidones	Unclassified			36.2	0	2M-H	C13H10O7S	-1.61911	1.30802	0.00266671	0.0540347	-0.353013	0.782947	55944.1	71453.2	54461.2	53550.4	63467.9	53822.7	54562.5	55799.6	68630.4	76164.4	59897	63444.1	81712.9	78870.3
11.69_435.2067m/z	435.207	11.6853	pos	8-Butanoylneosolaniol	HMDB0038560	Lipids and lipid-like molecules	Fatty Acyls	Fatty acid esters	*		36.3	0	M+H-H2O	C23H32O9	11.9134	1.30769	0.0236525	0.169594	0.824548	1.77098	44123.5	24914.7	34847.5	46788.5	32374.4	60590.7	28738.8	61400.8	41612.9	17959.8	33561.8	17160.6	20348.8	18844.4
9.80_488.3002m/z	488.3	9.8049	pos	Withanolide A	LMST01160019	Lipids and lipid-like molecules	Steroids and steroid derivatives	Steroid lactones	*		44.8	29.1	M+NH4	C28H38O6	-0.959526	1.30574	0.00870799	0.101989	-0.408302	0.75351	56501	74983.8	45021.2	76514.6	57893.4	37907.9	57059.4	64609.7	74382.1	74913.4	72750.7	73641	79049.3	75166.4
8.01_466.3291n	465.322	8.01148	neg	2β,3α,7α,12α-Tetrahydroxy-5β-cholestan-26-oic acid	43056	Unclassified	Unclassified	Unclassified			38.3	0	M-H, M+FA-H	C27H46O6	-0.687023	1.30282	0.0360845	0.208836	-1.46478	0.36229	11017	30409.4	12394	8264.83	7214.18	15119.1	18417.7	4692.31	26185.3	35066.4	66206.5	22883.1	15076.8	17038.2
10.43_529.3520m/z	529.352	10.4337	pos	(22S)-Acetoxy-3alpha,15alpha-dihydroxylanosta-7,9(11),24-trien-26-oic acid	HMDB0035225	Lipids and lipid-like molecules	Prenol lipids	Triterpenoids			52.3	64.9	M+H	C32H48O6	-0.701268	1.29969	0.0417061	0.224203	2.41757	5.34272	23930.2	4479.04	14202.3	18385.8	7541.28	14122.6	63397.3	25932.1	1061.98	5232.53	5055.24	1975.93	6093.17	7455.37
1.09_363.1397m/z	363.14	1.09343	pos	15-Deacetylneosolaniol	HMDB0036157	Lipids and lipid-like molecules	Prenol lipids	Sesquiterpenoids	*	C02951	37.6	0	M+Na	C17H24O7	-5.04545	1.29388	0.0155107	0.136127	1.87404	3.66558	26422.5	7208.27	39574.4	20779.4	46410.6	24827.6	5786.91	21156	11456.1	3356.77	18171.4	9169.81	595.818	499.69
4.56_301.0445n	302.052	4.55627	pos	N-Acetylgalactosamine 6-sulfate	HMDB0000841	Organic oxygen compounds	Organooxygen compounds	Carbohydrates and carbohydrate conjugates			37.8	0	M+H, M+Na	C8H15NO9S	-7.60425	1.29292	0.000391666	0.0205184	7.13079	140.146	15182.1	108.331	20092.7	2872.47	21184.5	19936.4	11215.9	15790.9	3.86958e-05	321.173	3.86958e-05	3.86958e-05	97.8955	230.916
9.83_582.3422m/z	582.342	9.82708	pos	PHOOA-PA	LMGP20070005	Lipids and lipid-like molecules	Glycerophospholipids	Oxidized glycerophospholipids			44.7	33.5	M+NH4	C27H49O10P	3.6569	1.29105	0.0343233	0.2038	1.23041	2.34634	32877.4	14012.2	14842.8	48865.6	35662.1	44349.5	22047.4	31497.3	16074.7	8803.16	37391.4	19556.4	1158.9	1088.85
12.16_529.2512m/z	529.251	12.1601	pos	PG(18:3(6Z,9Z,12Z)/0:0)	LMGP04050020	Lipids and lipid-like molecules	Glycerophospholipids	Glycerophosphoglycerols			42.1	21.3	M+Na	C24H43O9P	-4.95947	1.29035	0.0265032	0.179443	-1.02275	0.492176	17673.8	35909.5	22143.8	9849.61	21997.8	19076.5	25978.3	6996.91	29171.2	51918.5	20345.2	22756.5	57574.8	33690.9
13.30_326.3052m/z	326.305	13.2965	pos	11,14-eicosadienoic acid	LMFA01030130	Lipids and lipid-like molecules	Fatty Acyls	Fatty acids and conjugates	**	C16525	39	0	M+NH4	C20H36O2	-0.533151	1.28937	0.00818756	0.0986982	2.42092	5.35511	20849.2	3893.33	39435.5	15587.7	11116.3	5855.89	27726	25373.9	3770.06	8872.01	4906.94	2463.02	1622.25	1725.68
11.99_447.3252m/z	447.325	11.9875	pos	Alpha-Tocotrienol	HMDB0006327	Lipids and lipid-like molecules	Prenol lipids	Quinone and hydroquinone lipids	**	C14153	46.9	43.7	M+Na	C29H44O2	4.34649	1.28928	0.0332252	0.200159	-0.901571	0.535304	23738.5	44345.8	5760.76	35225.6	8494.32	38105.2	37126.2	17718.7	50569.1	42750.8	36852.4	33912.1	69537.8	32452.5
11.12_313.1883m/z	313.188	11.1187	pos	3'-Hydroxyropivacaine	2382	Unclassified	Unclassified	Unclassified			37.2	0	M+Na	C17H26N2O2	-1.07849	1.28717	0.000167676	0.0135682	2.94883	7.72123	16213.4	2099.84	26652.9	12310.4	18341.5	10672	13199.3	16104.3	1590.81	1902.95	4531.77	1813.38	1809.53	950.63
13.17_490.3887m/z	490.389	13.1663	pos	Priverogenin A	HMDB0034530	Lipids and lipid-like molecules	Prenol lipids	Triterpenoids	*		38.2	0	M+NH4	C30H48O4	-0.758598	1.28499	0.00161359	0.0412004	1.67248	3.18761	22103.8	6934.28	26265.5	18006.7	15491.4	33940.5	18718.3	20200.3	4570.09	12335	13943.2	7273.34	3.86958e-05	3484.03
9.87_419.3518m/z	419.352	9.87237	pos	Cholest-4-ene-3α,7α,12α-triol	43139	Unclassified	Unclassified	Unclassified			54.9	79	M+H	C27H46O3	-0.484756	1.28307	0.044468	0.230137	-2.24154	0.211461	5230.48	24735	3133.16	2968.95	10834.2	8260.77	5365.15	820.717	16427.7	51916.4	47705	19273.7	796.941	12290.3
11.69_235.2417m/z	235.242	11.6853	pos	(5Z,8Z)-1,5,8-Heptadecatriene	HMDB0041082	Hydrocarbons	Unsaturated hydrocarbons	Olefins			42.9	19.2	M+H	C17H30	-1.25894	1.27639	0.0133116	0.12584	1.30658	2.47354	28645.4	11580.7	19975.4	30100.1	16265.8	45230.8	17558.3	42742	19284.6	8383.48	17416	7436.21	9602.7	7361.48
11.38_459.3457m/z	459.346	11.3819	pos	(3beta,5alpha,9alpha,22E,24R)-3,5,9-Trihydroxy-23-methylergosta-7,22-dien-6-one	88610	Lipids and lipid-like molecules	Steroids and steroid derivatives	Ergostane steroids	*		54.4	81.3	M+H	C29H46O4	-2.66018	1.27597	0.015275	0.135154	-1.16188	0.446928	13745.2	30754.8	7692.14	13642.5	17444.5	12906.5	11798	18987.4	15159.9	51261.2	24681.4	19304.2	40507.1	33614.9
11.69_346.1896m/z	346.19	11.6853	pos	Lysergic acid diethylamide	66677	Unclassified	Unclassified	Unclassified			38.4	0	M+Na	C20H25N3O	1.90409	1.27514	0.0189342	0.151735	5.35411	40.9024	17396.3	425.312	15918.9	13639.5	6185.47	5633.1	46110.9	16889.8	429.054	916.135	230.805	498.481	305.106	172.291
6.98_429.1561m/z	429.156	6.97602	neg	12-Dehydroporson	HMDB0041417	Lipids and lipid-like molecules	Fatty Acyls	Fatty acyl glycosides			39.6	8.58	M+FA-H	C22H24O6	1.55924	1.27029	0.00106466	0.033591	1.55497	2.93827	20199.4	6874.59	9024.57	27712.2	19095.2	17880.5	23459.2	24024.5	11442.5	6373.96	4725.28	8865.32	6820.02	3020.46
7.75_371.2437m/z	371.244	7.74607	neg	6-Methyl-2-methylene-6-octene-1,3,8-triol	HMDB0038692	Lipids and lipid-like molecules	Fatty Acyls	Fatty alcohols	*		39.1	0	2M-H	C10H18O3	-0.454764	1.26541	0.00102062	0.0330303	-0.890969	0.539252	16070.4	29801.4	18930	14285.9	14548.6	17448.8	18890.6	12318.7	21791.4	41356.4	32587.6	26210.5	30744.3	26118
4.73_331.0772m/z	331.077	4.7291	neg	Penicillin X	71668	Unclassified	Unclassified	Unclassified			36.8	0	M-H2O-H	C16H18N2O5S	3.99201	1.26083	0.00269872	0.0542897	0.939908	1.91841	31618.8	16481.8	45283	26534.8	31468.2	31410.3	26338.7	28677.8	25149	7582.9	16940.5	19909.8	11750.8	17557.8
10.39_241.2271m/z	241.227	10.3895	pos	(E,E)-2,4-Decadienoic isobutylamide	HMDB0030951	Lipids and lipid-like molecules	Fatty Acyls	Fatty amides			39.6	1.67	M+NH4	C14H25NO	-1.48679	1.26024	0.0112458	0.115704	-0.399326	0.758212	48967.9	64583.4	40599.8	42305.6	53059	41869.1	51792.9	64181.2	70715.7	69825.5	67690.1	52262.6	70961.7	56044.9
11.69_322.2735m/z	322.274	11.6853	pos	ent-17-Hydroxy-16beta-kauran-19-al	HMDB0036721	Lipids and lipid-like molecules	Prenol lipids	Diterpenoids	*		38.6	0	M+NH4	C20H32O2	-1.76612	1.25876	0.00686205	0.0898663	1.27015	2.41187	26571.4	11016.9	17609.9	28652.7	17530.7	39897.3	18141.1	37596.7	16793.7	8990.58	15601.1	5741.99	10760.1	8214.1
9.92_677.3906m/z	677.391	9.92387	neg	Momordicoside E	90958	Lipids and lipid-like molecules	Steroids and steroid derivatives	Steroidal glycosides	*		37.9	0	M-H2O-H	C37H60O12	0.015683	1.25715	0.0168728	0.142809	28.6041	4.08026e+08	15788.9	3.86958e-05	8054.99	18854.5	4547.66	7019.26	41079.2	15177.6	3.86958e-05	3.86958e-05	3.86958e-05	3.86958e-05	3.86958e-05	3.86958e-05
4.53_653.2818m/z	653.282	4.53477	pos	beta-D-Gentiobiosyl crocetin	73402	Unclassified	Unclassified	Unclassified			38.4	0	M+H	C32H44O14	2.16949	1.25433	0.00105448	0.0335306	1.76907	3.40834	18527.6	5435.96	16192.4	21876.9	8541.01	14076.8	27270.2	23208.4	6548.15	3362.46	3316.98	6526.7	6008.25	6853.24
14.75_228.0074m/z	228.007	14.7485	pos	Nitroglycerin	HMDB0014865	Organic oxygen compounds	Organic oxoanionic compounds	Organic nitrates		C07455	37.3	0	M+H	C3H5N3O9	-11.0198	1.25423	0.00916072	0.104422	-0.163905	0.892606	130484	146183	133890	131216	135491	129091	122942	130276	150630	166502	137093	141169	137737	143969
8.63_446.1769n	447.184	8.63215	pos	Crosatoside B	HMDB0039253	Organic oxygen compounds	Organooxygen compounds	Carbohydrates and carbohydrate conjugates			38.6	0	M+H, M+Na	C20H30O11	-4.37613	1.25315	8.89545e-05	0.00976909	3.26061	9.58391	13554.2	1414.27	7508.24	16336.1	9951.37	15427.2	19935.2	12167.3	1263.95	215.144	549.604	1184.6	3795.7	1476.64
5.06_302.1516n	347.15	5.06177	neg	Enterodiol	58292	Lignans, neolignans and related compounds	Dibenzylbutane lignans	Dibenzylbutanediol lignans		C18166	47.4	41.5	M-H, M+FA-H	C18H22O4	-0.752838	1.25212	0.036507	0.210214	-4.24798	0.0526296	1047.93	19911.3	331.131	842.378	128.378	1155.79	3083.78	746.09	22987.7	7824.03	2252.82	2076.17	37056.3	47270.9
6.33_399.2718m/z	399.272	6.3342	pos	Istamycin B3	71989	Unclassified	Unclassified	Unclassified			38.6	0	M+H-H2O	C18H36N6O5	0.908411	1.24924	0.00109513	0.0340269	-0.943633	0.519922	14769	28406.3	19260.1	14761.4	11727.9	15870.7	14265.7	12728.4	22687.8	19846.4	28127.7	26940.6	35899.2	36935.9
9.38_416.3517m/z	416.352	9.37755	pos	calicoferol E	LMST03020157	Lipids and lipid-like molecules	Sterol Lipids	Secosteroids			47.8	47.1	M+NH4	C27H42O2	-1.4642	1.24679	0.00326954	0.0595767	1.04747	2.0669	28239.6	13662.8	22705.5	23990.9	29345	34598.7	34449.8	24348.1	15145	19435.8	20682.2	18416.4	4218.28	4079.02
10.37_468.2717m/z	468.272	10.3677	pos	17-trifluoromethylphenyl trinor PGF2α ethyl amide	64686	Unclassified	Unclassified	Unclassified			40.7	9.01	M+H	C26H36F3NO3	-0.758604	1.2467	0.0346628	0.204705	-0.896342	0.537247	20880.8	38866.2	27609.5	20017.2	29253.8	17970.8	18532.7	11900.6	42362.3	28087.8	22877.1	23362.4	62663.1	53844.5
4.10_291.0234m/z	291.023	4.10337	neg	ZAPA	69642	Unclassified	Unclassified	Unclassified			38.1	0	2M-H	C4H6N2O2S	2.1617	1.24426	0.0122937	0.121096	-4.15814	0.0560112	966.441	17254.4	491.296	595.931	412.754	976.32	2659.55	662.793	815.537	32243.1	1651.56	19587.7	23928.2	25300.4
11.40_609.3187m/z	609.319	11.4027	pos	Ganoderic acid Mk	90598	Lipids and lipid-like molecules	Prenol lipids	Triterpenoids	*		36.7	0	M+K	C34H50O7	-0.260355	1.24239	0.0218007	0.163155	6.9475	123.426	16339.6	132.385	7425.23	13552.9	4572.45	9129.62	44356.4	19001.2	3.86958e-05	3.86958e-05	15.6221	2.02183	776.663	3.86958e-05
4.09_252.0243m/z	252.024	4.0912	pos	N-Acetyl-L-glutamyl 5-phosphate	HMDB0006456	Organic acids and derivatives	Carboxylic acids and derivatives	Amino acids, peptides, and analogues	**	C04133	37.3	0	M+H-H2O	C7H12NO8P	-9.22618	1.23488	0.0119278	0.119375	-3.1911	0.109492	1963.33	17931.2	797.148	1091.82	1042.2	1906.66	5238.24	1703.91	1722.22	27389.9	2963.71	18645.7	29616.5	27249.2
10.01_301.2383m/z	301.238	10.0094	neg	Methyl 2,6,10-trimethyl-dodecanoate	LMFA07010485	Lipids and lipid-like molecules	Fatty Acyls	Fatty esters			45.2	28.6	M+FA-H	C16H32O2	-0.676757	1.23268	0.0414177	0.223352	1.1013	2.14549	36751.9	17129.9	68248.6	25986.5	33423.7	27616.8	24527.6	40708.1	37702.7	6904	13797.6	25319.6	12871.7	6183.65
4.66_397.3063m/z	397.306	4.66435	pos	N-oleoyl asparagine	LMFA08020137	Lipids and lipid-like molecules	Fatty Acyls	Fatty amides			47.1	39.5	M+H	C22H40N2O4	0.431118	1.23258	0.0244803	0.171923	-1.20134	0.434872	13136.6	30208	9389.93	18241	12470.6	11438.5	14765	12514.8	28280.4	33165.4	55489.6	36033	13702.8	14576.9
2.19_400.0681m/z	400.068	2.18732	neg	Prosulfuron	68715	Unclassified	Unclassified	Unclassified			36.7	0	M-H2O-H	C15H16F3N5O4S	-3.70374	1.23236	0.0129055	0.123696	28.7262	4.44062e+08	17183.3	3.86958e-05	44076.5	4666.57	17730.8	15337.6	9551.78	11736.8	3.86958e-05	3.86958e-05	3.86958e-05	3.86958e-05	3.86958e-05	3.86958e-05
10.01_621.4006m/z	621.401	10.0094	neg	Mosesin 4	71507	Unclassified	Unclassified	Unclassified			38.1	0	M-H2O-H	C35H60O10	-0.378731	1.22587	0.000179457	0.0139097	1.95914	3.8883	16350.1	4204.94	17175.5	19543.1	12198.5	22527.2	12073.5	14582.5	9122.14	3369.78	4913.4	5443.57	1259.64	1121.08
5.87_455.1683m/z	455.168	5.86578	pos	5,2',4',5'-Tetrahydroxy-3-(3-hydroxy-3-methylbutyl)-6'',6''-dimethylpyrano[2'',3'':7,8]flavone	49352	Phenylpropanoids and polyketides	Flavonoids	Flavones		C02347	40.9	19.7	M+H	C25H26O8	-3.75819	1.22441	0.00370039	0.0637328	1.98509	3.95888	17292.1	4367.92	5751.49	27903.2	14986.2	12193.6	25151.8	17766.1	6340.71	3674.87	3617.76	6460.76	4038.07	2075.38
6.98_417.2493m/z	417.249	6.97602	neg	19R-hydroxy-PGF1alpha	LMFA03010038	Lipids and lipid-like molecules	Fatty Acyls	Eicosanoids			41.9	15.2	M+FA-H	C20H36O6	-0.261389	1.22299	0.000969861	0.0320778	1.05264	2.07432	24375.6	11751.1	27251.3	29056.2	18932.6	20817.2	25586.9	24609.3	16642.4	8567.48	14506.6	18527	6666.9	5596.28
4.47_402.0815m/z	402.082	4.46873	pos	5-(acetyloxy)-4,14-dihydroxy-9-oxo-8,17-dioxatetracyclo[8.7.0.0²,⁷.0¹¹,¹⁶]heptadeca-1(10),2,4,6,11,13,15-heptaen-13-yl acetate	HMDB0128412	Phenylpropanoids and polyketides	Isoflavonoids	Coumestans			38.4	0.813	M+NH4	C19H12O9	-1.14394	1.22233	0.000372337	0.0202418	7.03701	131.326	13323.7	101.455	15579.1	6308.59	14198.4	16335.5	5837.98	21682.5	300.367	9.2819	3.86958e-05	278.157	3.86958e-05	20.9237
10.08_412.2717m/z	412.272	10.0755	pos	3'-Methoxy-[6]-Gingerdiol 3,5-diacetate	HMDB0040569	Lipids and lipid-like molecules	Fatty Acyls	Fatty alcohol esters	*		37.9	0	M+NH4	C22H34O6	6.01493	1.22033	4.17283e-05	0.00708676	-2.15343	0.224777	3426.96	15246.1	3362.64	4593.92	2850.08	2912.26	3531.83	3311.02	21820.5	10110.6	14968.2	14089.6	17974.5	12512.9
7.82_499.3165m/z	499.316	7.82373	pos	PC(6:0/8:0)[U]	39968	Unclassified	Unclassified	Unclassified			38	0	M+NH4	C22H44NO8P	4.52376	1.21412	3.07778e-05	0.00600954	2.94136	7.68137	12844.2	1672.12	7244.12	18061.8	12939.8	11121.7	12044.1	15653.4	908.208	2897.61	805.902	1606.96	2067.33	1746.69
12.29_728.5283n	746.562	12.287	pos	PA(16:0/22:2(13Z,16Z))	HMDB0114845	Lipids and lipid-like molecules	Glycerophospholipids	Glycerophosphates	*		36.7	0	M+NH4, M+Na	C41H77O8P	-10.0878	1.21326	0.0224539	0.165718	-0.238936	0.84737	89576.8	105711	89627.7	87503.5	87089.5	96705.5	88491.4	88043.1	94770.4	117927	88643	100417	126224	106288
11.24_471.3477m/z	471.348	11.2365	neg	3alpha-Corosolic acid	HMDB0041043	Lipids and lipid-like molecules	Prenol lipids	Triterpenoids	*		38.5	1.73	M-H	C30H48O4	-0.575821	1.2067	0.0236254	0.169484	1.71181	3.2757	24586.2	7505.61	19866.5	18052.5	54487.7	15224.8	22696.3	17189.3	3465.19	7758.36	4564.69	3904.27	16818.6	8522.56
12.31_311.2943m/z	311.294	12.3085	pos	cis-gondoic acid	3554	Lipids and lipid-like molecules	Fatty Acyls	Fatty acids and conjugates	**	C16526	46.7	37	M+H	C20H38O2	-0.539878	1.2061	0.00102525	0.0331376	0.791811	1.73125	30329.1	17518.7	30971.3	30248.4	25954.1	27200.8	27676	39924.2	14750.4	25518.2	19203.9	18509.2	14054.5	13075.8
3.41_302.0503m/z	302.05	3.40632	neg	Beta-Citryl-L-glutamic acid	HMDB0013220	Organic acids and derivatives	Carboxylic acids and derivatives	Amino acids, peptides, and analogues			38.4	0	M-H2O-H	C11H15NO10	-4.57365	1.2028	0.000974953	0.0321261	7.68188	205.341	13557.1	66.0222	15258.9	5089.92	22575.1	12144.3	6087.7	20186.7	40.443	63.6534	125.351	98.3035	36.8191	31.5632
13.62_442.3537m/z	442.354	13.6202	neg	12-Hydroxy-12-octadecanoylcarnitine	LMFA07070028	Lipids and lipid-like molecules	Fatty Acyls	Fatty acid esters	*		38.4	0	M-H	C25H49NO5	-0.201076	1.20211	0.012207	0.121079	7.05821	133.27	14257.1	106.979	5346.14	27302.4	16177.1	347.75	9044.78	27324.6	377.526	3.86958e-05	264.35	3.86958e-05	3.86958e-05	3.86958e-05
6.05_252.0229m/z	252.023	6.05188	neg	Brassica oleracea Alkaloid	HMDB0033602	Organic acids and derivatives	Carboxylic acids and derivatives	Amino acids, peptides, and analogues			37.4	0	M-H2O-H	C13H9N3O2S	-2.79991	1.19651	0.0316791	0.195678	6.73747	106.704	15243.6	142.859	3690.11	22444.5	4166.32	5919.29	41708.5	13532.9	85.8272	179.562	68.3337	91.6312	239.073	192.727
2.80_240.0510m/z	240.051	2.7958	neg	Dopachrome o-semiquinone	HMDB0012931	Organoheterocyclic compounds	Indoles and derivatives	Indolecarboxylic acids and derivatives			42.8	17.8	M+FA-H	C9H9NO4	-1.99181	1.19484	0.000200539	0.0147073	1.3648	2.5754	18235.5	7080.63	20222.2	25143.3	12583	15776.7	19759.8	15927.9	9504.83	7075.39	7335.84	8552.66	4229.67	5785.42
12.09_313.1886m/z	313.189	12.0941	pos	N-Methyl-4-(3,4-dimethoxyphenyl)-4-cyano-5-methylhexylamine	3015	Unclassified	Unclassified	Unclassified			37.2	0	M+Na	C17H26N2O2	-0.156544	1.19262	0.000393717	0.0205342	4.18667	18.2101	13086.3	718.63	20592.3	10992.2	17588.7	4716.1	9543.43	15085.2	333.602	1095	1308.25	1028.76	507.527	38.6402
10.14_496.2665m/z	496.267	10.1427	pos	PS(16:1(9Z)/0:0)	LMGP03050010	Lipids and lipid-like molecules	Glycerophospholipids	Glycerophosphoserines			43.3	21.4	M+H	C22H42NO9P	-0.980686	1.19203	0.00274109	0.0545361	-2.97084	0.127553	1921.74	15066.2	2352.4	1256.88	1685.9	2236.17	3121.7	877.366	16389.2	14153.9	5826.16	6088.07	22924.8	25015.3
11.70_515.3374m/z	515.337	11.698	neg	Ganoderiol B	HMDB0035327	Lipids and lipid-like molecules	Prenol lipids	Triterpenoids	*		47.7	45.8	M+FA-H	C30H46O4	-0.953281	1.18925	0.0140985	0.129748	2.845	7.18507	16508	2297.54	9166.51	13802.1	6679.33	11267.8	38227	19905.4	1266.6	1276.95	208.657	1565.44	5176.8	4290.82
7.39_455.0885m/z	455.088	7.39365	neg	Bensulfuron-methyl	68703	Unclassified	Unclassified	Unclassified			37.6	0	M+FA-H	C16H18N4O7S	1.61037	1.18912	0.000131316	0.01205	0.766032	1.70059	28175.5	16568.1	33214.8	26143.6	26153	28291.7	26597.6	28652.6	20985.3	11553.6	13839.2	20921.9	17499.5	14609.4
4.93_394.1763m/z	394.176	4.93178	pos	Dihydroxyfumitremorgin C	HMDB0038581	Organoheterocyclic compounds	Indoles and derivatives	Pyridoindoles			41.8	24.5	M+H-H2O	C22H25N3O5	0.520969	1.18754	0.000564596	0.0249214	1.47137	2.77286	18617.2	6714.08	20137.5	20435.6	16324.8	19044	17826.9	17934.4	12318.8	4420.08	11323.2	11438.2	341.089	443.074
5.17_555.0469m/z	555.047	5.17215	neg	{5-[6-(3,4-dihydroxy-6-methyl-5-oxooxan-2-yl)-5,7-dihydroxy-4-oxo-4H-chromen-2-yl]-2-hydroxyphenyl}oxidanesulfonic acid	HMDB0127320	Phenylpropanoids and polyketides	Flavonoids	Flavonoid glycosides			41.4	25.4	M+FA-H	C21H18O13S	3.6697	1.1874	0.0364766	0.210087	-0.426963	0.743826	48294.6	64927.3	40839.5	43011.2	57182.2	48005.2	45648.1	55081.3	77175.2	68672.9	36207.4	60820.7	78910.6	67776.8
4.26_377.1244m/z	377.124	4.26068	neg	5'-Hydroxy-3'-methoxysativan	HMDB0039571	Phenylpropanoids and polyketides	Isoflavonoids	O-methylated isoflavonoids			50	56.5	M+FA-H	C18H20O6	0.747538	1.18607	0.0422703	0.225149	-0.877528	0.544299	20946.9	38484.2	6232.05	23268.9	22987	27638.3	24066.3	21489.1	66990	37808.1	21270.6	30471.2	48278	26087.5
5.74_357.1917m/z	357.192	5.73913	neg	2,3-di-0-hexanoyl-alpha-glucopyranose	LMSL05000001	Unclassified	Unclassified	Unclassified			46.5	43	M-H2O-H	C18H32O8	-0.445017	1.18276	0.0115076	0.117004	-0.791087	0.577909	19487.2	33720.3	24422.7	18842.1	16492.7	19216.6	19155	18794.3	28917.5	18506.3	34117.1	28165.9	47022	45593
11.27_362.2820n	361.275	11.275	neg	2-(8-[5]-ladderane-octanyl)-sn-glycerol	LMGL01020036	Lipids and lipid-like molecules	Glycerolipids	Monoradylglycerols			42.7	21.8	M-H, M+FA-H	C23H38O3	-0.342509	1.18243	0.00883916	0.102595	-1.1919	0.437725	10904.7	24912.3	12675.9	13660.9	11794.9	4925.8	5978.15	16392.7	14296.4	35947.2	15451.1	20560.4	35197.6	28021.1
4.09_245.1860m/z	245.186	4.0912	pos	Isoleucyl-Isoleucine	85816	Organic acids and derivatives	Carboxylic acids and derivatives	Amino acids, peptides, and analogues			46.4	35.5	M+H	C12H24N2O3	0.322752	1.18097	0.0351028	0.206527	-2.06598	0.238823	5097.92	21346	5249.87	5331.37	5390.63	6770.15	4959.31	2886.21	8507.53	22900.3	7528.23	13695.3	51396.8	24047.8
3.98_679.2508m/z	679.251	3.98277	pos	1-[3-(6-{2,4-dihydroxy-3-[(1E)-3-hydroxy-3-methylbut-1-en-1-yl]benzoyl}-5-(2,4-dihydroxyphenyl)-3-methylcyclohex-2-en-1-yl)-2,4-dihydroxyphenyl]-3-(2,4-dihydroxyphenyl)propan-1-one	HMDB0126451	Phenylpropanoids and polyketides	Diarylheptanoids	Linear diarylheptanoids			49.8	70.5	M+H-H2O	C40H40O11	-4.20096	1.18074	0.00557947	0.0794009	10.1331	1122.97	14666.3	13.0603	19960.2	5141.2	30996.6	13587.9	3078.92	15232.9	3.86958e-05	74.1624	4.19921	3.86958e-05	3.86958e-05	3.86958e-05
4.09_411.1552m/z	411.155	4.0912	pos	gamma-L-Glutamyl-S-(2-carboxy-1-propyl)cysteinylglycine	HMDB0029394	Organic acids and derivatives	Carboxylic acids and derivatives	Amino acids, peptides, and analogues			41.6	20.6	M+NH4	C14H23N3O8S	1.99596	1.17737	0.00475147	0.0733976	-2.59755	0.165219	2582.82	15632.7	3571.22	845.125	1463.87	3273.18	5500.92	842.638	15813.7	283.266	21226.9	12169.3	24430.4	19872.7
5.15_363.1812m/z	363.181	5.14983	neg	(1(10)E,4E,6a,9b)-9-(2-Methylpropanoyloxy)-1(10),4,11(13)-germacratrien-12,6-olide	HMDB0031373	Lipids and lipid-like molecules	Prenol lipids	Terpene lactones	*		41.9	14.6	M+FA-H	C19H26O4	-0.47829	1.1771	1.63919e-05	0.00432185	1.41956	2.67505	17104	6393.89	18967.9	17721.1	16128.3	17266.4	16865.3	15674.9	8602.73	3849.62	8387.83	10658.7	3520.15	3344.3
14.25_503.3363m/z	503.336	14.25	pos	3alpha,7alpha,12alpha,24-tetrahydroxy-24-methyl-5beta-cholestan-26-oic acid	LMST04040001	Unclassified	Unclassified	Unclassified			43.7	27.5	M+Na	C28H48O6	4.05374	1.17578	0.0142368	0.130134	-1.8813	0.271439	5896.45	21722.9	1596.27	23998.4	4556.32	1799.06	2284.77	1143.86	37369	25534.7	17674.9	24780.3	12012.4	12966.3
8.58_461.2908m/z	461.291	8.58182	neg	1alpha,25-Dihydroxy-16-ene-19-nor-24-oxovitamin D3	LMST03020609	Lipids and lipid-like molecules	Sterol Lipids	Secosteroids			51.6	62.7	M+FA-H	C26H40O4	-0.164314	1.17481	0.0245801	0.172314	2.47647	5.56533	19218.6	3453.28	16621.2	14042.9	1825.29	21888.3	16793.8	44140.3	549.763	2868.3	2197.76	1182.85	12282.1	1638.9
3.94_989.4895m/z	989.489	3.93823	pos	Phytolaccasaponin B	HMDB0034638	Lipids and lipid-like molecules	Prenol lipids	Terpene glycosides	*		37.4	0	M+H	C48H76O21	-5.78702	1.17471	0.0165491	0.141069	1.52188	2.87165	23427.4	8158.17	14058.8	14795.9	30434.9	25185	18373.4	37716.7	16300	1070.22	11524.4	20054.5	3.86958e-05	3.86958e-05
11.05_304.2035n	305.211	11.0524	pos	2beta-Hydroxytestosterone	HMDB0012654	Lipids and lipid-like molecules	Sphingolipids	Phosphosphingolipids	**	C00550	44	27.2	M+H-H2O, M+H	C19H28O3	-1.10664	1.17439	1.5987e-05	0.00432185	1.09948	2.14278	19972.3	9320.74	20376.7	19487	19646.1	15017.6	22440.1	22866.1	11745.9	7120.05	8131.79	11027.3	9998.73	7900.73
11.70_605.3074m/z	605.307	11.698	neg	Fulvestrant	HMDB0015082	Lipids and lipid-like molecules	Steroids and steroid derivatives	Estrane steroids			43.8	35.8	M-H	C32H47F5O3S	-3.20059	1.17188	0.00405658	0.066607	2.66514	6.34288	14813.4	2335.44	9753.82	14217.7	7894.72	10692.1	29131.9	17190.2	1005.7	614.679	382.042	313.84	6552.28	5144.09
9.83_851.5142m/z	851.514	9.82708	pos	Hebevinoside V	HMDB0035981	Lipids and lipid-like molecules	Steroids and steroid derivatives	Steroidal glycosides	*		43.3	28.7	M+H	C46H74O14	-1.07171	1.17105	0.0176054	0.14606	-8.62142	0.00253917	37.27	14678	3.86958e-05	3.86958e-05	166.876	56.744	3.86958e-05	3.86958e-05	16532.7	8333.98	2620.79	7901.17	38409.1	14270.3
7.93_464.3138n	463.307	7.92743	neg	Alliogenin	LMST01080013	Lipids and lipid-like molecules	Sterol Lipids	Sterols			41.1	14	M-H, M+FA-H	C27H44O6	0.0670104	1.17056	0.0286184	0.186628	-1.70238	0.307278	6755.63	21985.4	7428.91	5331.81	3626.27	9019	8143.49	6984.29	13511.9	39834.2	40751.1	16532.3	7733.09	13549.6
7.65_465.3216m/z	465.322	7.64582	neg	1-O-(2R-methoxy-4Z,7Z,10Z,13Z,16Z-docosapentaenyl)-sn-glycerol	LMGL01020045	Lipids and lipid-like molecules	Glycerolipids	Monoradylglycerols			47.9	48.3	M+FA-H	C26H44O4	-1.35242	1.16726	0.0077812	0.0959405	-1.84194	0.278947	5135.04	18408.6	5642.69	4137.52	3188.92	7910.9	7000.19	2929.98	12019.9	28572.8	31843	16929.1	8460.75	12626.2
3.15_361.0917m/z	361.092	3.14592	pos	Rosmarinic acid	HMDB0003572	Phenylpropanoids and polyketides	Cinnamic acids and derivatives	Hydroxycinnamic acids and derivatives	**	C01850	50.2	54.9	M+H	C18H16O8	-0.304157	1.16711	0.0226788	0.166181	-0.855439	0.552697	19495.1	35272.7	19016.1	34604.5	21010.9	18128.5	12217.3	11993.3	54162.8	20746.1	40841.1	34820.1	35313.3	25752.9
3.75_425.0494m/z	425.049	3.7507	neg	5,14-bis(acetyloxy)-4-hydroxy-9-oxo-8,17-dioxatetracyclo[8.7.0.0²,⁷.0¹¹,¹⁶]heptadeca-1(10),2,4,6,11,13,15-heptaen-13-yl acetate	HMDB0128404	Phenylpropanoids and polyketides	Isoflavonoids	Coumestans			41.4	20.6	M-H	C21H14O10	-4.77266	1.16653	0.00108496	0.0339096	3.09399	8.53856	13872.4	1624.68	24711.3	12509.8	15517.7	4233.33	12018.5	14243.8	1849.52	1265.63	1546.92	1616.21	2039.92	1429.86
12.29_198.0171m/z	198.017	12.287	pos	L-trans-alpha-Amino-2-carboxycyclopropaneacetic acid	HMDB0034442	Organic acids and derivatives	Carboxylic acids and derivatives	Amino acids, peptides, and analogues			38.4	0	M+K	C6H9NO4	4.81182	1.16652	0.0053311	0.0777861	-0.22285	0.856871	79223.1	92456.3	79917.4	83014.2	82301.1	80685.6	72561.4	76858.9	88472.6	92527.1	83189.8	85951.7	100828	103769
7.13_516.1704m/z	516.17	7.13242	neg	Pizotyline-N-glucuronide	2037	Unclassified	Unclassified	Unclassified			37.2	0	M+FA-H	C25H29NO6S	1.40521	1.16601	0.00188858	0.0446757	4.91287	30.1246	11751.5	390.097	3453.2	18767.5	7605.8	9087.38	20564.8	11030.4	1304.58	275.518	96.3039	438.323	171.591	54.2664
5.00_546.2490m/z	546.249	4.99507	neg	PC(8:2(2E,4E)/8:2(2E,4E))	LMGP01011254	Lipids and lipid-like molecules	Glycerophospholipids	Glycerophosphocholines			36.8	0	M+FA-H	C24H40NO8P	3.23288	1.1658	0.00177272	0.0429449	1.78402	3.44384	16105.7	4676.67	7842.73	21988.5	13161.5	13887.5	24337.9	15415.9	8117.41	4510.8	4529.73	6699.12	3851.74	351.205
9.19_469.3282m/z	469.328	9.19257	neg	Procainamide	HMDB0015169	Benzenoids	Benzene and substituted derivatives	Benzoic acids and derivatives		C07401	38.1	1.44	2M-H	C13H21N3O	-3.05681	1.16549	0.0330043	0.199774	2.97759	7.87669	17952.1	2279.15	10471.3	9769.06	19551.7	145.221	43472.4	24303.1	836.127	9900.77	1692.8	1245.18	3.86958e-05	3.86958e-05
9.62_596.3230m/z	596.323	9.61747	neg	POV-PE	LMGP20020030	Lipids and lipid-like molecules	Glycerophospholipids	Oxidized glycerophospholipids			40.7	12.9	M+FA-H	C26H50NO9P	4.44244	1.16515	0.0174767	0.145543	1.82082	3.53282	21824.6	6177.68	28592	16643.7	22205	16502.7	5382.19	41622.2	4539.47	11512.9	13721.2	5596.21	1348.83	347.453
7.35_208.0972m/z	208.097	7.35273	neg	n-Propylbenzamide	HMDB0061786	Benzenoids	Benzene and substituted derivatives	Benzoic acids and derivatives			39.8	4.89	M+FA-H	C10H13NO	-4.50154	1.16398	0.0151973	0.1348	-1.02246	0.492275	14282.7	29013.7	12107.8	10889.8	10381.8	20443.7	19961.5	11911.9	30555.1	21226.6	19991.1	24559.6	26721.4	51028.6
4.60_333.0930m/z	333.093	4.59675	neg	(S)-a-Amino-2,5-dihydro-5-oxo-4-isoxazolepropanoic acid N2-glucoside	HMDB0029404	Organic oxygen compounds	Organooxygen compounds	Carbohydrates and carbohydrate conjugates			39.1	2.05	M-H	C12H18N2O9	-2.77999	1.16351	0.00472272	0.0731716	0.721951	1.64941	33186.5	20120.2	41262.5	29877.8	30341	29680.1	39427.9	28530	26150.5	12873.2	22604	27629.2	20455.5	11009
12.63_328.3209m/z	328.321	12.6312	pos	D-erythro-Sphingosine C-20	45095	Unclassified	Unclassified	Unclassified			47.7	42.6	M+H	C20H41NO2	-0.239785	1.15823	0.000806218	0.0293389	1.90311	3.74018	14951.2	3997.46	10549.2	23636.4	15203	10655.6	15549.8	14113.4	9071.88	3156.13	4799.99	4702.42	2254.37	3.86958e-05
7.78_499.3388m/z	499.339	7.77787	pos	Fusidic Acid	HMDB0015570	Lipids and lipid-like molecules	Steroids and steroid derivatives	Steroid esters		C06694	37.8	0	M+H-H2O	C31H48O6	-5.75641	1.15758	0.0197465	0.155025	0.968496	1.9568	27895.5	14255.7	21343.8	43384.3	25343.6	17865.5	23931.3	35504.8	4812.78	19336	11478.1	7573.06	20757.3	21577
4.05_619.2302m/z	619.23	4.04755	pos	Tetragastrin	HMDB0005775	Organic acids and derivatives	Carboxylic acids and derivatives	Amino acids, peptides, and analogues			46	45.9	M+Na	C29H36N6O6S	-1.28548	1.15659	0.00692393	0.0903056	22.5151	5.99397e+06	14349	0.00239391	19997.5	4473.51	30645	16217.3	2747.83	12012.9	0.01417	3.86958e-05	3.86958e-05	3.86958e-05	3.86958e-05	3.86958e-05
12.09_588.3186m/z	588.319	12.0941	pos	Amphibine H	HMDB0029333	Organic acids and derivatives	Carboxylic acids and derivatives	Amino acids, peptides, and analogues			45.5	54.1	M+H-H2O	C33H43N5O6	0.99591	1.15655	0.00223422	0.0487572	2.80162	6.97225	15011.2	2152.99	24301.4	10884.9	21561.9	5166.18	10577.7	17575.1	3.86958e-05	3323.4	6277	2446.03	871.503	3.86958e-05
7.70_383.2765m/z	383.276	7.70247	pos	Misoprostol	HMDB0015064	Lipids and lipid-like molecules	Fatty Acyls	Eicosanoids			37	0	M+H	C22H38O5	-7.14404	1.15614	0.00124942	0.0363729	-1.87885	0.271901	4376.82	16097.1	4184.08	2593.22	3887.79	5116.9	7452.2	3026.7	9241	25380.9	14539.8	10185.8	16354.5	20880.6
10.21_469.3309m/z	469.331	10.2107	pos	16beta-16-Hydroxy-3-oxo-1,12-oleanadien-28-oic acid	95185	Lipids and lipid-like molecules	Prenol lipids	Triterpenoids	*		49.8	57.1	M+H	C30H44O4	-0.709018	1.15566	0.044186	0.22937	3.20919	9.24834	17414.3	1882.97	10513.5	12585.3	5672.76	8293.5	50092.8	17327.9	424.713	2935.23	1033.71	1159.9	3417.31	2326.93
6.63_513.2085m/z	513.208	6.6283	pos	4-Ketoretinoic acid glucuronide	HMDB0061689	Lipids and lipid-like molecules	Prenol lipids	Terpene glycosides	*		47	40.8	M+Na	C26H34O9	-2.09145	1.1548	0.0086301	0.101503	2.43341	5.40168	16441.5	3043.78	33712.4	15343.1	9066.77	8963.58	22206.7	9356.69	2408.41	1007.11	2731.42	2794.88	3122.5	6198.38
7.90_385.2230m/z	385.223	7.8958	neg	Oleandolide	LMPK04000031	Lipids and lipid-like molecules	Polyketides	Macrolides and lactone polyketides	**	C11990	43.4	24.5	M-H	C20H34O7	-0.395283	1.15276	0.000746948	0.0285887	-1.67062	0.314117	5243.68	16693.4	5944.33	6450.62	3778.06	4874.64	6183.01	4231.46	9972.55	17413.2	15879.8	10784.3	24443.8	21666.6
1.48_184.0606m/z	184.061	1.47758	pos	5-Methoxy-3-hydroxyanthranilate	69051	Unclassified	Unclassified	Unclassified			46.6	36	M+H	C8H9NO4	0.64148	1.15228	0.0361813	0.20884	-3.3102	0.100816	1763.08	17488	2550.31	1281.46	1405.79	2056.11	1552.63	1732.16	1883.97	33833.5	1920.69	5359.2	29513.5	32417.2
11.54_474.2070n	473.2	11.5434	neg	Sildenafil	HMDB0005039	Benzenoids	Benzene and substituted derivatives	Benzenesulfonamides		C07259	37.6	2.22	M-H, M+FA-H	C22H30N6O4S	4.4525	1.15154	0.0283843	0.18592	1.11083	2.1597	29482	13650.9	21512.2	12551.9	35924.3	46567.9	38786.9	21548.5	25174.9	6839.87	16852.8	19136.7	5363.82	8537.57
7.11_471.2421m/z	471.242	7.10622	neg	Chenodeoxycholic acid sulfate	LMST05020026	Lipids and lipid-like molecules	Steroids and steroid derivatives	Bile acids, alcohols and derivatives	*		38.9	4.55	M-H	C24H40O7S	-0.132358	1.14848	0.0415219	0.223674	-2.09762	0.233643	4991.11	21362.1	3523	7057.99	3971.56	4908.76	5699.68	4785.65	4087.75	13805.6	7976.48	17676.5	37985.5	46640.9
3.56_270.1337m/z	270.134	3.5632	pos	2-[2,4,6-trihydroxy-3-(3-methylbut-2-en-1-yl)phenyl]acetic acid	HMDB0125460	Benzenoids	Benzene and substituted derivatives	Phenylacetic acids			42.2	15.9	M+NH4	C13H16O5	0.476074	1.14815	0.000293956	0.0181356	1.92933	3.80879	14629.6	3841	15516.9	20878.4	16200.2	15297.7	8553.98	11330.3	3394.83	5416.01	6785.63	5226.98	1460.82	761.77
1.80_154.0378n	155.045	1.8026	pos	Imidazol-5-yl-pyruvate	63492	Unclassified	Unclassified	Unclassified			40.6	6.41	M+H, M+Na, M+H-H2O	C6H6N2O3	-0.254901	1.14771	0.000919443	0.031464	3.71693	13.1494	12021.9	914.253	15771.8	13230.3	2331.18	12032	19425.2	9340.98	941.584	562.427	1289.4	1139	726.302	826.807
11.07_303.1964m/z	303.196	11.0661	neg	2-Acetyl-3,5,5,6,8,8-hexamethyl-5,6,7,8- tetrahydronaphthalene	HMDB0061860	Benzenoids	Tetralins	Unclassified			45.4	30.1	M+FA-H	C18H26O	-0.725879	1.14751	8.84631e-05	0.00976909	1.04563	2.06426	20157.6	9765.05	19739.9	20983.2	20498.3	13744.6	23250.2	22729.6	12201.3	6988.36	7697.32	11860	10577.6	9265.63
0.78_218.1267n	219.134	0.775233	pos	N2-(D-1-Carboxyethyl)-L-lysine	63467	Unclassified	Unclassified	Unclassified			43.9	23	M+H-H2O, M+H	C9H18N2O4	0.408883	1.14439	0.00436333	0.0694872	-0.638286	0.642476	21594.1	33610.8	31483.4	21400.7	17949.7	21925.4	18972	17833.4	25332	30755.5	38531.3	30509.3	42546.8	33989.7
6.38_491.2277m/z	491.228	6.3799	pos	Austalide F	89936	Organoheterocyclic compounds	Benzopyrans	1-benzopyrans			47.1	45.1	M+H	C26H34O9	0.206802	1.14269	0.000139144	0.0123656	2.46767	5.5315	12441.6	2249.23	5427.61	15715.2	11386.4	11291.7	16694.5	14134.2	2876.68	1722.19	2852.73	3022.95	2425.64	595.176
11.49_793.5405m/z	793.54	11.4902	pos	PG(17:1(9Z)/22:4(7Z,10Z,13Z,16Z))	79101	Lipids and lipid-like molecules	Glycerophospholipids	Glycerophosphoglycerols			36	0	M+H-H2O	C45H79O10P	3.31669	1.14128	0.000200975	0.0147073	2.46422	5.51827	13407	2429.56	15942.2	7813.83	8705.66	13692.9	17236.3	17051.1	531.532	5993.47	815.277	1784.77	4194.01	1258.32
8.11_453.2341m/z	453.234	8.11477	neg	Methyl cellulose	86592	Organic oxygen compounds	Organooxygen compounds	Carbohydrates and carbohydrate conjugates			39.2	0	M-H	C20H38O11	-0.0851687	1.14106	0.0257272	0.177166	-2.33099	0.198747	3653.07	18380.5	4365.88	4667.16	4725.1	2902.66	3383.25	1874.38	24040.2	40096.9	1621.18	11251.6	23783.2	9489.83
5.13_365.1954m/z	365.195	5.13093	pos	12-Oxo-20-carboxy-leukotriene B4	LMFA03020047	Lipids and lipid-like molecules	Fatty Acyls	Fatty acids and conjugates	*		38.7	0	M+H	C20H28O6	-1.33937	1.14004	0.000440339	0.0216265	1.61057	3.05373	16231.3	5315.26	20800.4	19045.2	11600.5	18174.9	11396.3	16370.8	8859.33	3129.38	7810.92	8428.65	2369.42	1293.86
5.57_811.3558m/z	811.356	5.57485	neg	CHUKRASIN METHYL ETHER	43781	Unclassified	Unclassified	Unclassified			38.2	0	M-H2O-H	C43H58O16	1.44961	1.13702	0.0027431	0.0545361	2.22985	4.69085	15233.3	3247.46	9724.18	13511.7	13966.7	22889.8	9960.37	21347.3	12841.3	2738.45	283.106	2847.27	774.661	3.86958e-05
6.05_380.9903m/z	380.99	6.05188	neg	Quercetin 3-O-sulfate	LMPK12112304	Lipids and lipid-like molecules	Polyketides	Flavonoids			36.7	1.12	M-H	C15H10O10S	-4.88356	1.13619	0.0472251	0.236558	6.19336	73.1791	14646.9	200.151	3009.75	20781.6	3113.5	5023.91	43303.9	12648.7	50.5675	187.225	307.592	172.954	203.254	279.315
13.86_481.3652m/z	481.365	13.8557	pos	MG(0:0/i-24:0/0:0)	HMDB0072872	Lipids and lipid-like molecules	Glycerolipids	Monoradylglycerols	*		39.1	2.68	M+K	C27H54O4	-0.490753	1.13303	0.0271874	0.18192	-1.03359	0.488494	13478.5	27591.9	17560.7	11511.7	15483.9	13010.2	13190.6	10113.7	13821.7	20054.2	29556	16238.3	44915.4	40965.6
4.77_335.0661n	380.064	4.77262	neg	beta-nicotinamide D-ribonucleotide	HMDB0059645	Nucleosides, nucleotides, and analogues	Pyridine nucleotides	Nicotinamide nucleotides	**	C00455	38.8	2.67	M-H, M+FA-H	C11H16N2O8P+	4.97794	1.13121	0.00125182	0.0363729	6.5991	96.9454	12113.3	124.95	21442.2	3052.15	8297.11	17774.7	10591.5	11522.1	489.731	37.2394	81.941	97.7417	43.046	3.86958e-05
5.89_400.1991m/z	400.199	5.88878	pos	4,8-Diacetyl-T2-tetrol	HMDB0035201	Lipids and lipid-like molecules	Prenol lipids	Sesquiterpenoids	*		36.7	0	M+NH4	C19H26O8	6.49281	1.13035	0.0293898	0.18877	1.50737	2.84291	23031.9	8101.54	33451.8	13012.4	18194.9	28270.9	38871.9	6389.8	22047.7	2996.83	5167.6	4922.7	8516.64	4957.71
13.66_443.3517m/z	443.352	13.6594	pos	5beta-Cholestane-3alpha,7alpha,24-triol	HMDB0062418	Lipids and lipid-like molecules	Steroids and steroid derivatives	Bile acids, alcohols and derivatives	*		41.5	17.8	M+Na	C27H48O3	4.99257	1.13009	0.0116789	0.117991	0.953997	1.93723	27946.5	14426	40932.3	28266.2	23857.6	20933.8	22454.3	31234.7	11916.4	27983.7	16089.9	15873.3	9346.18	5346.32
0.73_197.0119m/z	197.012	0.731767	neg	2-methyl-4-(sulfooxy)butanoic acid	HMDB0130850	Lipids and lipid-like molecules	Fatty Acyls	Fatty acids and conjugates	*		39.5	6.31	M-H	C5H10O6S	-3.32654	1.12784	0.00060725	0.0256206	1.56417	2.95708	15490.1	5238.3	12289.7	24132	12618	17638.6	13783.4	12478.6	7224.04	5398.57	6698.34	6636.09	2892.62	2580.12
4.79_725.2417m/z	725.242	4.79485	neg	GSK264220A	45429	Unclassified	Unclassified	Unclassified			37.5	0	2M-H	C17H21N3O4S	-2.21338	1.12588	8.49348e-05	0.00966412	2.27303	4.83336	12359.3	2557.08	10016.4	13981.4	7923.97	12667	16489.7	13077.3	5311.21	820.543	1130.63	5679.16	1556.84	844.117
4.73_206.0943n	207.102	4.7316	pos	3-Dimethylallyl-4-hydroxybenzoate	64578	Benzenoids	Benzene and substituted derivatives	Benzoic acids and derivatives			47.8	43.1	M+H-H2O, M+H	C12H14O3	0.215569	1.12532	0.0162276	0.139641	1.1438	2.20963	25634	11601	48272.7	22633.5	19906.5	22852.6	22250.6	17888.3	14612.8	6045.06	15962.6	14059.7	8509.52	10416.5
10.49_503.3374m/z	503.337	10.4942	neg	alpha-Carissanol	90874	Lipids and lipid-like molecules	Prenol lipids	Sesquiterpenoids	*		39	0	2M-H	C15H24O3	-0.855768	1.12532	1.52617e-05	0.00426411	1.33758	2.52727	16550.5	6548.75	18182.5	16390.5	14934.1	15248.3	14209.1	20338.5	4290.75	8262.31	9208.97	3820.86	7166.71	6542.9
14.49_396.3023m/z	396.302	14.4884	pos	N-(2-fluro-ethyl)-eicosanoyl amine	LMFA08020049	Lipids and lipid-like molecules	Fatty Acyls	Fatty amides			40.3	13.7	M+K	C22H44FNO	-4.43293	1.12426	0.0327388	0.199189	1.23228	2.34938	25586.1	10890.6	21648.3	21871	16743	50006.4	28293.1	14954.8	23005.9	6357.66	10224.5	12132.5	10656.6	2966.19
10.89_499.3086m/z	499.309	10.8899	neg	Pentalenic acid	LMPR0103890001	Lipids and lipid-like molecules	Prenol lipids	Isoprenoids			39.3	9.75	2M-H	C15H22O3	4.10079	1.12401	0.00730519	0.0928228	-1.13675	0.454784	10578.6	23260.7	9256.45	7777.8	15704.8	4844.01	16991.6	8896.88	30240.6	20046.5	24022.8	26607.3	8975.7	29671.3
0.79_332.0750m/z	332.075	0.793483	pos	Indoxyl glucuronide	HMDB0010319	Lipids and lipid-like molecules	Steroids and steroid derivatives	Steroidal glycosides			40.3	9.07	M+Na	C14H15NO7	3.00702	1.12294	0.0428095	0.226058	-1.27602	0.412932	11233.6	27204.5	10121.1	16911.8	14803.7	3127.45	14097.2	8340.43	18365.5	39092.3	3613.63	40023.7	43787.3	18344.5
10.26_457.3669m/z	457.367	10.2554	pos	Ganodermatriol	90618	Lipids and lipid-like molecules	Prenol lipids	Tetraterpenoids	*		51	62.3	M+H	C30H48O3	-1.5379	1.11993	0.0332516	0.200226	0.493576	1.40793	53354.3	37895.6	53043.5	43021.2	71073.7	44502.2	55758.3	52727.1	45673.9	46003.4	43037.5	46627.3	23488.7	22542.8
5.80_238.1203n	239.128	5.79712	pos	2,2,4,4,-Tetramethyl-6-(1-oxopropyl)-1,3,5-cyclohexanetrione	89065	Lipids and lipid-like molecules	Prenol lipids	Monoterpenoids	*		46.7	38.7	M+H-H2O, M+H	C13H18O4	-0.882878	1.11664	0.010784	0.113301	-2.01698	0.247075	4103.83	16609.7	7219.51	3539.75	2808.61	3469.1	4970.7	2615.32	6752.37	33630.9	15047.2	8853.61	20295.1	15078.9
5.07_413.2514m/z	413.251	5.06615	pos	GRAYANOTOXIN I	43915	Unclassified	Unclassified	Unclassified			39.1	7.71	M+H	C22H36O7	-4.88771	1.11508	0.00584994	0.0814274	-0.512855	0.700834	27751.2	39597.4	38687.6	29563.5	20223.3	27394.8	24833.3	25805	38187.9	33827.8	45376.2	42383.6	45101.8	32707.3
9.71_315.2175m/z	315.217	9.71342	neg	11-keto palmitic acid	LMFA01060058	Lipids and lipid-like molecules	Fatty Acyls	Fatty acids and conjugates	*		44	23.3	M+FA-H	C16H30O3	-0.810456	1.11337	0.00343298	0.061006	1.32462	2.50467	20665.3	8250.69	21985.4	10868.1	30510.4	23831.4	17071.1	19725.4	13510.5	13895.3	5017.84	7500.78	6471.52	3108.2
8.65_383.2074m/z	383.207	8.6484	neg	Dodecyl gallate	HMDB0038720	Benzenoids	Benzene and substituted derivatives	Benzoic acids and derivatives			40.1	6.56	M+FA-H	C19H30O5	-0.256512	1.11274	0.00161865	0.0412004	-1.24742	0.421201	7944.61	18861.8	9700.08	8778.03	6023.05	8252.07	7817.92	7096.5	19189.9	25846.8	24908.3	18282.7	15609.1	9334.03
2.29_287.0826n	288.09	2.293	pos	Citrusinine II	HMDB0030373	Organoheterocyclic compounds	Quinolines and derivatives	Benzoquinolines			36.7	0	M+H-H2O, M+H	C15H13NO5	11.1249	1.11077	0.00651807	0.0871363	5.97589	62.9393	13298.2	211.287	30724.5	3802.55	14502.3	12598.2	7216.29	10945.6	158.651	126.913	3.86958e-05	680.69	209.414	92.0519
7.35_257.0816m/z	257.082	7.35273	neg	2E,4E,6E,12E-Tetradecatetraene-8,10-diynoic acid	LMFA01031086	Lipids and lipid-like molecules	Fatty Acyls	Fatty Acids and Conjugates			45.8	32.3	M+FA-H	C14H12O2	-1.51611	1.10708	0.0210713	0.16025	1.51976	2.86743	20861.7	7275.41	15777.7	8285.68	9835.03	27695.6	36042.1	27534.1	10842.1	4329.56	1121.37	3712.63	11278.3	12368.6
11.65_495.2730m/z	495.273	11.6536	neg	1beta-Hydroxyalantolactone	HMDB0031970	Lipids and lipid-like molecules	Prenol lipids	Terpene lactones	*		39.8	6.75	2M-H	C15H20O3	-4.43894	1.10675	0.023304	0.16864	-2.98681	0.126148	1949.05	15450.5	3877.83	522.952	2159.12	2063.24	2365.8	705.329	6939.25	14461.8	4427.79	5912.25	33576.5	27385.4
11.38_226.0118m/z	226.012	11.3819	pos	Ethoate-methyl	72742	Unclassified	Unclassified	Unclassified			39.1	0	M+H-H2O	C6H14NO3PS2	-0.755457	1.10624	0.00295924	0.0567605	-0.266975	0.831061	55103.8	66305.4	52858.2	50577.5	57585.4	58158.8	61254.1	50188.7	63912.9	74467	62101.3	60135	66913	70303.1
6.87_603.2826m/z	603.283	6.87353	neg	Lanceotoxin B	67238	Unclassified	Unclassified	Unclassified			37.6	0	M-H	C32H44O11	2.47985	1.10514	5.86458e-07	0.000867475	1.63474	3.10532	13506.5	4349.46	15062.6	14015.3	14115.6	11965.7	11467.4	14412.3	5417.87	4896.04	3969.39	6095.66	3488.47	2229.36
11.12_325.1828m/z	325.183	11.1187	pos	Piperonyl sulfoxide	72888	Unclassified	Unclassified	Unclassified			42.7	22.9	M+H	C18H28O3S	-1.15525	1.1036	0.000297861	0.0181356	2.12708	4.36833	13428.8	3074.14	15791.7	8493.74	8285.87	19152.8	16051.5	12797.5	5119	831.461	3921.88	4193.47	2817.97	1561.05
6.09_363.1450m/z	363.145	6.09042	neg	3,4,5-trihydroxy-6-{[1-(4-methoxyphenyl)-4-methylpent-1-en-3-yl]oxy}oxane-2-carboxylic acid	HMDB0132958	Lipids and lipid-like molecules	Fatty Acyls	Fatty acyl glycosides	*		43.4	22.3	M-H2O-H	C19H26O8	0.146738	1.10281	0.0083502	0.099478	0.711683	1.63771	33122.6	20224.9	41877.9	27431	39250.7	35294.9	24395.5	30485.6	28966	8830.8	19161.2	17997.6	23779	22614.9
11.57_395.1741m/z	395.174	11.5656	neg	2-Amino-6-methyldipyrido[1,2-a:3',2'-d]imidazole	HMDB0029749	Organoheterocyclic compounds	Imidazopyridines	Unclassified		C19244	40.5	6.4	2M-H	C11H10N4	0.643819	1.09985	0.00797163	0.0971194	1.52188	2.87165	18296.1	6371.3	10976.7	19678.8	9360.82	28163.2	13410	28187.2	8860.56	3794.23	10475.1	4293.63	4794.66	6009.59
3.83_261.1447m/z	261.145	3.82605	pos	Glutamylisoleucine	HMDB0028822	Organic acids and derivatives	Carboxylic acids and derivatives	Amino acids, peptides, and analogues			42.5	15.7	M+H	C11H20N2O5	0.888077	1.09886	0.00064863	0.0261779	0.845985	1.79749	23554.8	13104.3	21195.5	24341.3	27744.9	24379.5	20510.5	23157.3	10962.9	19500	11329	14874.8	15633.5	6325.53
2.04_210.1125m/z	210.113	2.03583	pos	Allyl phenoxyacetate	HMDB0031610	Benzenoids	Benzene and substituted derivatives	Phenoxyacetic acid derivatives			40.3	4.08	M+NH4	C11H12O3	0.341038	1.09772	0.0108312	0.113333	1.06565	2.09311	25224	12050.9	35706.5	18728.3	30407.9	23603.8	18517.3	24380.3	19431.7	6587.26	20286.2	17608.9	4576.21	3815.39
0.56_196.0167m/z	196.017	0.556733	pos	3-Indoxyl phosphate	103478	Unclassified	Unclassified	Unclassified			37.7	0	M+H-H2O	C8H8NO4P	4.402	1.09694	0.00748662	0.0937743	-0.738803	0.599236	18220.8	30406.8	20829.7	22665.8	21370.6	11891.2	16357.9	16209.8	33483.2	44180.4	24774.7	31614.8	22513.9	25873.7
6.67_387.2388m/z	387.239	6.6655	neg	2,3-Dinor-TXB1	LMFA03030012	Lipids and lipid-like molecules	Fatty Acyls	Eicosanoids			41.7	13.9	M+FA-H	C19H34O5	-0.213626	1.09391	0.00555904	0.0793346	-0.720923	0.606709	18006.7	29679.3	28791.6	24805.7	11529.6	15374.8	15388.4	12150	25236.9	33137.4	33457	25087.3	32707.2	28449.8
13.57_466.5343m/z	466.534	13.5748	pos	8-Methyl-3-hentriacontene	HMDB0035279	Hydrocarbons	Unsaturated hydrocarbons	Unsaturated aliphatic hydrocarbons			38.5	0.522	M+NH4	C32H64	-0.764319	1.09366	0.0045119	0.071177	-0.281129	0.822947	53703.9	65258.1	57856.8	53938.3	49243.7	50174.5	53766.4	57243.7	64556.5	64912.6	55505.9	61121.9	69971.2	75480.4
11.56_468.3837m/z	468.384	11.5563	pos	Vitamin K1	HMDB0003555	Lipids and lipid-like molecules	Prenol lipids	Quinone and hydroquinone lipids	*	C05850	39.5	2.49	M+NH4	C31H46O2	0.193535	1.09164	0.00638446	0.0859442	1.10846	2.15615	21788.4	10105.3	15091.6	20124	22441.1	29914.8	26739.8	16419.3	14586.3	5930.21	19966.2	9193.72	6253.69	4701.33
13.42_219.1742m/z	219.174	13.4233	pos	6,8,10,12-pentadecatetraenal	75363	Lipids and lipid-like molecules	Fatty Acyls	Fatty aldehydes			47.8	44.4	M+H	C15H22O	-0.834135	1.0895	1.66714e-05	0.00432185	1.98682	3.96363	12602.1	3179.44	17070.3	11301.7	11479.2	9485.14	10869	15407.4	2734.72	2801.25	3790.19	3768.67	3459.11	2522.69
10.50_400.3417m/z	400.342	10.5007	pos	Persenone B	HMDB0035959	Lipids and lipid-like molecules	Fatty Acyls	Fatty alcohols	*		38.4	16.3	M+NH4	C23H42O4	-1.26641	1.08764	0.0229597	0.167273	1.28436	2.43574	22647.2	9297.88	15334.3	25787.6	34609.7	36808.5	9996.48	13346.9	6110.26	8361.41	16203	12643.1	5860.87	6608.65
10.17_575.3020m/z	575.302	10.1718	neg	Arginyl-Asparagine	HMDB0028704	Organic acids and derivatives	Carboxylic acids and derivatives	Amino acids, peptides, and analogues			37.6	0.358	2M-H	C10H20N6O4	0.116747	1.08703	0.0317631	0.195996	1.06607	2.09373	28551.4	13636.6	25345.7	19952.2	34739.8	45265.5	15436	30569	17109	10230.4	30888.8	14492.2	6502.13	2597.15
0.72_689.2104m/z	689.21	0.716683	pos	Glycogen	HMDB0000757	Organic oxygen compounds	Organooxygen compounds	Carbohydrates and carbohydrate conjugates	**	C00182	36.8	0	M+Na	C24H42O21	-0.989833	1.08681	0.00152391	0.0399586	1.86863	3.65185	14740.5	4036.45	12986.6	14516.3	13128.9	16831	6427.95	24552.5	2766.77	3049.53	4013.68	6399.16	4677.12	3312.46
9.20_425.3367m/z	425.337	9.19905	pos	Delta-Tocopherol	HMDB0002902	Lipids and lipid-like molecules	Prenol lipids	Quinone and hydroquinone lipids	**	C14151	37	0	M+Na	C27H46O2	-5.72957	1.08647	0.0136571	0.127292	1.53673	2.90136	18852.6	6497.84	13724.5	15116.1	22184.2	3909.65	29825.3	28355.8	3775.59	10598.6	7377.53	4791.86	6140.69	6302.76
12.33_455.3508m/z	455.351	12.3299	pos	Ganoderic acid U	HMDB0035962	Lipids and lipid-like molecules	Prenol lipids	Triterpenoids	*		50.4	66.1	M+H-H2O	C30H48O4	-2.53942	1.08542	0.0123621	0.121264	1.21233	2.31712	20660.4	8916.43	23617.4	23348.4	11931.2	10722.9	29861.9	24480.8	3836.74	19493.6	5091.31	7382.7	9703.92	7990.28
4.60_295.1219m/z	295.122	4.59675	neg	Litcubinine	HMDB0032650	Organoheterocyclic compounds	Tetrahydroisoquinolines	Unclassified			38.5	3.31	M-H2O-H	C18H20NO4+	1.59295	1.08524	0.000356598	0.0199267	1.46486	2.76037	15162.3	5492.84	14410.5	18204.3	9152.59	16657.8	13896.8	18651.7	3628.95	2211.3	5877.38	5678.29	10397.3	5163.85
5.63_687.2652m/z	687.265	5.6284	neg	TAXININE M	84989	Unclassified	Unclassified	Unclassified			37.9	0	M-H	C35H44O14	-0.954906	1.08368	5.67501e-06	0.0027443	1.90793	3.75269	11968.2	3189.23	9954.84	15142.6	10169.4	10803.2	11486.9	14252.2	3797.48	2588.23	4569.73	3253.05	3639.03	1287.84
0.79_215.1160n	238.107	0.793483	pos	5-hydroxyoct-6-enoylglycine	HMDB0094764	Organic acids and derivatives	Carboxylic acids and derivatives	Amino acids, peptides, and analogues			42.5	27.2	M+NH4, M+Na	C10H17NO4	0.97696	1.08173	0.0270565	0.181478	-0.643653	0.64009	23285.7	36378.8	28161.9	25233.9	20546.3	22132.1	20868.8	22771.3	31210.5	56830.8	40511	38149.8	30020.4	21550.5
11.12_632.2617m/z	632.262	11.1187	pos	N1,N5,N10-Tricaffeoyl spermidine	64186	Unclassified	Unclassified	Unclassified			41.9	17.9	M+H	C34H37N3O9	2.22878	1.08106	0.0282024	0.185358	-0.22093	0.858012	85159.2	99251.8	74401.6	87808	86869.5	84120.7	86369.2	91386.3	96948	100542	88871.3	94770.2	91716.9	122662
7.73_325.2734m/z	325.273	7.72562	pos	8,9-EE-14(Z)-E	45621	Unclassified	Unclassified	Unclassified			46.4	35.3	M+H	C20H36O3	-0.980145	1.07902	0.00501224	0.0751119	-1.86205	0.275085	4213.14	15315.8	4099.2	2667.75	3515.4	4371.17	7797.3	2828.02	8409.54	29296.3	14196.3	10682.1	13219.1	16091.2
11.51_464.3516m/z	464.352	11.5121	pos	3-Hydroxysintaxanthin	HMDB0035641	Lipids and lipid-like molecules	Prenol lipids	Triterpenoids	*		39.2	11.4	M+NH4	C31H42O2	-1.56818	1.07867	0.000364706	0.0200676	2.96936	7.83191	11394.9	1454.93	16710.5	10184.7	5868.88	8563.98	10641.4	16399.7	433.704	2245.79	4413.24	560.885	743.696	332.253
4.31_653.2819m/z	653.282	4.31395	pos	Dicrocin	58121	Lipids and lipid-like molecules	Prenol lipids	Diterpenoids	*		38.6	0	M+H	C32H44O14	2.27765	1.07781	0.000124035	0.0119045	1.71172	3.27552	13609.6	4154.95	17015.1	13886.8	11851	11518.9	13936.8	13449	3239.64	3.86958e-05	3135.19	4434.73	10056.6	4063.48
10.96_471.3476m/z	471.348	10.9558	neg	7-Hydroxycostol	HMDB0035040	Lipids and lipid-like molecules	Prenol lipids	Sesquiterpenoids	*		40.4	11.8	2M-H	C15H24O2	-0.912382	1.07604	0.00312898	0.0581665	0.881212	1.84192	23605.4	12815.6	21070.2	23507.8	22513.4	20926.7	28076.4	25537.9	8129.43	23128.1	17895.1	8891.66	10573.2	8276.36
8.40_812.3507m/z	812.351	8.39875	neg	Aclacinomycin N	72427	Unclassified	Unclassified	Unclassified			38.3	0	M-H	C42H55NO15	1.00326	1.07585	0.00823181	0.0988998	3.39266	10.5025	12710.7	1210.25	17429.2	11370.6	15525.3	5351.86	24623.7	1963.55	575.656	503.639	5682.45	499.771	3.86958e-05	3.86958e-05
4.20_149.0235m/z	149.023	4.2019	pos	Terephthalic acid	HMDB0002428	Benzenoids	Benzene and substituted derivatives	Benzoic acids and derivatives	**	C06337	41.1	8.46	M+H-H2O	C8H6O4	1.0463	1.07532	0.00211718	0.0472829	1.08274	2.11806	20984.4	9907.38	27597.1	17020	30195.2	20248.2	14564.6	16281.4	9587.44	9006.12	8931.53	8965.89	10407.4	12545.9
4.88_288.0998n	287.092	4.88442	neg	11-Methoxyyangonin	HMDB0030740	Phenylpropanoids and polyketides	Kavalactones	Unclassified			42.8	18.6	M-H, M+FA-H	C16H16O5	-0.0526237	1.07433	0.0423113	0.225149	-1.83508	0.280275	5435.08	19391.9	5692.46	2991.3	5232.34	5263.04	11615.6	1815.73	20356.3	6365.88	8295.07	9959.49	43055.5	28319.4
0.71_197.0351n	242.034	0.7104	neg	Tauropine	65620	Unclassified	Unclassified	Unclassified			37.5	0	M-H, M+FA-H	C5H11NO5S	-3.46616	1.07415	0.004031	0.0664087	1.63551	3.10697	15246.5	4907.2	14453.7	16799.7	5203.73	15360.8	25531.8	14129.6	7045.08	3629.92	4854.26	7779.74	3630.18	2504.04
10.75_443.3517m/z	443.352	10.7459	pos	13'-Carboxy-alpha-tocopherol	HMDB0012555	Lipids and lipid-like molecules	Prenol lipids	Quinone and hydroquinone lipids	*		47.2	42.3	M+H-H2O	C29H48O4	-0.612357	1.07336	0.00144934	0.0392306	1.05108	2.07208	19868.9	9588.9	23077.6	21298.3	17277.5	16558.7	20257.7	20743.9	5744.72	19108.9	11577.6	7850.53	8479.15	4772.56
5.63_375.2751m/z	375.275	5.6284	neg	MG(0:0/16:0/0:0)	HMDB0011533	Lipids and lipid-like molecules	Glycerolipids	Monoradylglycerols	*		42.1	16.4	M+FA-H	C19H38O4	-0.385466	1.07195	0.000227292	0.0157452	-0.687165	0.621073	15027.3	24195.6	17386.3	11793.7	13824.5	13077.5	15151.4	18930.1	21847.1	22445.5	23811.9	23760.4	30034.8	23274.1
11.50_412.2855m/z	412.285	11.4995	neg	N-Docosahexaenoyl GABA	HMDB0062332	Organic acids and derivatives	Carboxylic acids and derivatives	Amino acids, peptides, and analogues			47.6	44.2	M-H	C26H39NO3	-0.640414	1.07122	0.000101989	0.0106416	2.27955	4.85528	11391.7	2346.26	7457.28	11967.6	7456.48	13947.1	12160.8	15361.1	3942.42	1339.98	815.132	4126.29	2338.31	1515.41
6.22_271.1550m/z	271.155	6.21598	neg	DIHYDROJASMONIC ACID, METHYL ESTER	43916	Unclassified	Unclassified	Unclassified			39.6	0	M+FA-H	C13H22O3	-0.584777	1.0708	0.0261495	0.178597	0.541199	1.45518	43172.4	29668.1	63701.6	38356.6	32417.1	39532.8	42935.7	42090.7	34277.6	19017.3	37753.8	33275.9	27468.8	26214.9
9.82_677.3905m/z	677.39	9.82358	neg	Lucyoside K	HMDB0041353	Lipids and lipid-like molecules	Prenol lipids	Terpene glycosides	*		55	81.3	M+FA-H	C36H56O9	-0.268929	1.06644	0.00715213	0.0916186	28.0153	2.713e+08	10498.2	3.86958e-05	5771.29	14290.2	3215.73	3252.3	22087.2	14372.4	3.86958e-05	3.86958e-05	3.86958e-05	3.86958e-05	3.86958e-05	3.86958e-05
4.22_256.0270m/z	256.027	4.22458	pos	Dopamine 4-sulfate	HMDB0004148	Organic acids and derivatives	Organic sulfuric acids and derivatives	Arylsulfates		C13691	37.6	0	M+Na	C8H11NO5S	8.34598	1.06375	0.00720454	0.0921501	1.02375	2.0332	22427.7	11030.7	30792.4	20928.5	19316.2	22714.6	20775.6	20038.7	16660.9	5381.64	17706	18103.8	5076.13	3255.93
12.73_724.4583m/z	724.458	12.7317	neg	PS(15:0/18:3(6Z,9Z,12Z))	LMGP03010146	Lipids and lipid-like molecules	Glycerophospholipids	Glycerophosphoserines			45.6	35.8	M-H2O-H	C39H70NO10P	3.26577	1.06095	0.035703	0.207918	3.57726	11.9361	14353	1202.49	1154.54	4641.05	11531.1	27905.6	33550.9	7334.88	1795.13	1651.83	494.287	3.86958e-05	1015.38	2258.28
0.75_266.0340m/z	266.034	0.753517	neg	S-(3-oxo-3-carboxy-n-propyl)cysteine	HMDB0002135	Organic acids and derivatives	Carboxylic acids and derivatives	Amino acids, peptides, and analogues			40.2	9.59	M+FA-H	C7H11NO5S	-0.106022	1.05907	0.000970779	0.0320778	3.76825	13.6256	9986.71	732.936	11184.9	14542.1	1952.31	8351.48	15338.5	8550.97	875.117	596.965	1363.3	1028.65	309.041	224.543
13.42_259.2053m/z	259.205	13.4233	pos	11,15-octadecadiynoic acid	LMFA01030546	Lipids and lipid-like molecules	Fatty Acyls	Fatty Acids and Conjugates			44.7	33.7	M+H-H2O	C18H28O2	-1.3024	1.05893	5.22789e-05	0.00801588	2.75534	6.75211	10579.3	1566.82	13970.5	10368.2	9310.4	6170.58	9002.74	14653.6	1471.39	1963.04	2250.85	2145.08	985.797	584.754
1.09_205.0951n	188.092	1.09343	pos	N-Acetyl-D-quinovosamine	70939	Unclassified	Unclassified	Unclassified			40.6	4.82	M+H-H2O, M+Na, M+H	C8H15NO5	0.162255	1.05803	0.0246238	0.172476	0.555354	1.46953	41487.8	28232	60438.3	33826.1	32429	35941.5	41665.6	44626.2	32373.8	22439.2	36220.7	33704.6	22566.4	22087.5
10.77_620.1524n	643.141	10.768	pos	Apigenin 7-(3''-acetyl-6''-E-p-coumaroylglucoside)	LMPK12110403	Lipids and lipid-like molecules	Polyketides	Flavonoids			43.1	20.8	M+H, M+Na, M+NH4	C32H28O13	-0.990297	1.05566	0.0415754	0.223827	-0.43362	0.740401	37792.2	51042.9	45673.4	28889.7	32493.1	42789.2	54613.8	22294.3	60956.5	50581.9	44909.5	43817.8	58056.2	47935.4
6.81_407.2802m/z	407.28	6.81168	neg	3a,4b,12a-Trihydroxy-5b-cholanoic acid	HMDB0000330	Lipids and lipid-like molecules	Steroids and steroid derivatives	Bile acids, alcohols and derivatives	*		42.6	18.6	M-H	C24H40O5	-0.347546	1.05565	0.0356257	0.20766	-0.713703	0.609753	20298.6	33289.8	19734.5	17369.8	19476.4	22898.9	30718.4	11593.4	28710.3	43331.3	30299	13937.6	44082.8	39377.9
13.36_398.2333m/z	398.233	13.363	neg	Levomethadyl Acetate	HMDB0015358	Benzenoids	Benzene and substituted derivatives	Diphenylmethanes	**	C08012	39.6	5.47	M+FA-H	C23H31NO2	-1.01721	1.05488	0.000461564	0.0221502	-0.501347	0.706447	22953.3	32491.2	23841.7	22614.8	20627	20967.6	26880.4	22788.1	34383.7	38612.3	28168.6	28409.4	31546.9	33826.1
6.20_481.1488m/z	481.149	6.19508	neg	3,4,5-trihydroxy-6-{4-[3-(5-hydroxy-2,2-dimethyl-2H-chromen-6-yl)propanoyl]phenoxy}oxane-2-carboxylic acid	HMDB0125894	Phenylpropanoids and polyketides	Flavonoids	Flavonoid glycosides			43.2	33.2	M-H2O-H	C26H28O10	-3.25515	1.05482	0.000481155	0.0225309	1.28725	2.44063	15185.3	6221.85	8800.97	18803.6	14691.1	13778.5	17895.9	17141.5	8456.08	4188.4	3881.1	8582.84	7860.88	4361.83
15.41_205.1223m/z	205.122	15.4104	pos	(6S)-dehydrovomifoliol	LMPR0103050009	Lipids and lipid-like molecules	Prenol lipids	Sesquiterpenoids	*	C04223	45.1	35.8	M+H-H2O	C13H18O3	0.0612059	1.05463	0.00416586	0.0674531	0.793863	1.73371	23908.1	13790.1	16103.1	28742.2	23149.3	31029.5	21467.6	22956.9	16201.5	13688.2	14274.1	19262.9	12181.8	7132.29
5.89_293.2110m/z	293.211	5.88878	pos	13S-HpOTrE	LMFA02000052	Lipids and lipid-like molecules	Fatty Acyls	Octadecanoids			48.3	45	M+H-H2O	C18H30O4	-0.457409	1.05423	0.0127595	0.123049	0.967814	1.95587	21152.1	10814.7	10437.1	32269.1	17544.1	16401.2	29358.3	20902.9	12177.1	8963.07	9713.91	12183.8	11301	10549.2
13.06_411.2149m/z	411.215	13.0582	pos	PG(12:0/0:0)	LMGP04050011	Lipids and lipid-like molecules	Glycerophospholipids	Glycerophosphoglycerols			38.9	0	M+H-H2O	C18H37O9P	1.44825	1.05421	0.0420292	0.22477	1.84516	3.59292	18042.6	5021.72	34795.2	32765.4	12720.8	4797.77	5840.83	17335.6	2068.03	1116.27	2678.01	5227.81	12360.4	6679.76
2.77_234.1336m/z	234.134	2.77035	pos	Hydroxypropionylcarnitine	LMFA07070074	Lipids and lipid-like molecules	Fatty Acyls	Fatty acid esters	*		46.8	36	M+H	C10H19NO5	-0.186066	1.05381	0.0229899	0.167395	1.71161	3.27527	18014.7	5500.21	17313	21199.6	10800	32372.9	3362.26	23040.3	5607	3175.29	14575.1	8417.07	467.427	759.363
11.53_522.3180n	545.308	11.5344	pos	Metabolite M6	HMDB0061034	Benzenoids	Indanes	Unclassified			37	0.064	M+H, M+Na	C30H42N4O4	-4.89472	1.05355	0.0205925	0.1585	1.67693	3.19748	19053	5958.77	11718.3	5964.58	31912.1	32196.8	15982	16544.5	9074.59	445.705	9646.54	11208.5	2994.32	2382.99
10.83_270.2193n	271.226	10.8345	pos	(-)-Malyngolide	65417	Unclassified	Unclassified	Unclassified			46.3	35.7	M+H-H2O, M+H	C16H30O3	-0.859098	1.05343	0.00216223	0.0478201	0.511204	1.42524	34974.3	24539.3	32000.9	30077.8	31882.5	41914	37824	36147	24121	28563.8	27824.9	16969.2	27124	22632.9
8.21_353.2332m/z	353.233	8.21255	neg	13,14-dihydro-15-keto-PGE1	36194	Lipids and lipid-like molecules	Fatty Acyls	Eicosanoids			49.7	55.7	M-H	C20H34O5	-0.316535	1.05298	0.00064236	0.0261779	-2.2958	0.203655	2407.56	11821.8	2382.12	2826.74	2082.31	2573.18	2575.81	2005.22	5077.48	16547.1	15200.1	14652.5	12478.8	6974.64
10.10_474.2589m/z	474.259	10.098	pos	LysoPE(0:0/16:1(9Z))	HMDB0011474	Lipids and lipid-like molecules	Glycerophospholipids	Glycerophosphoethanolamines	*		46.8	45.2	M+Na	C21H42NO7P	-0.503318	1.05214	0.00353074	0.0619136	-1.61029	0.327532	5066.72	15469.4	4565.25	4867.89	4860.24	5402.25	6542.49	4162.18	13464	24564.4	7924.77	8390.02	19507.7	18965.5
14.21_425.3774m/z	425.377	14.2052	pos	Anhydrosophoradiol	90573	Lipids and lipid-like molecules	Prenol lipids	Triterpenoids	*		44.6	28.6	M+H	C30H48O	-0.936979	1.05175	0.025501	0.176313	-0.845727	0.55643	14976.5	26915.3	17918.9	15752.5	15631	12968.4	15673.1	11915.1	17128.6	27636.5	47733.2	20050.9	26657.5	22285.2
7.44_463.3064m/z	463.306	7.44282	neg	Ecdysone	LMST01010210	Lipids and lipid-like molecules	Sterol Lipids	Sterols		C00477	37	0	M-H	C27H44O6	-0.210001	1.05042	0.00711259	0.0915435	-1.24512	0.421874	7671.8	18185.1	8267.75	5785.64	5047.79	10758.5	8054.75	8116.36	7955.81	22242.8	21471.4	10480.3	26931.9	20028.2
9.03_410.2311m/z	410.231	9.03328	neg	PC(0:0/10:0)[U]	40336	Unclassified	Unclassified	Unclassified			38.2	0	M-H	C18H38NO7P	-0.416525	1.04763	0.028198	0.185358	-3.08685	0.117697	1683.58	14304.4	2468.64	1847.21	1416.45	1550.47	2267.42	551.32	11470.8	5439.06	4654.6	5244.83	28966.6	30050.7
4.06_617.2149m/z	617.215	4.06002	neg	3-Hydroxy-7-acetylaminonitrazepam	1564	Unclassified	Unclassified	Unclassified			38.7	0	2M-H	C17H15N3O3	-0.760787	1.0461	0.0101706	0.109576	28.2226	3.13218e+08	12120.2	3.86958e-05	15012.6	3930.95	27896.4	15066.5	2373.89	8441.01	3.86958e-05	3.86958e-05	3.86958e-05	3.86958e-05	3.86958e-05	3.86958e-05
13.08_404.3149m/z	404.315	13.0803	pos	CB-25	45213	Unclassified	Unclassified	Unclassified			38.3	0	M+H	C25H41NO3	-2.46354	1.04467	0.0384429	0.215874	0.316438	1.24525	66716.4	53576.6	63160.3	64963	72939.4	79627	57253.6	62355.4	61485.9	43764.2	45174.1	69512.2	57223.7	44299.8
9.10_537.2150m/z	537.215	9.10285	neg	3-Vinylbacteriochlorophyllide d	63979	Unclassified	Unclassified	Unclassified			36.8	0	M-H2O-H	C33H32MgN4O3	0.57657	1.04445	0.0188058	0.151277	-0.62304	0.649301	22104.6	34043.7	17137.3	18492.4	12880	35430.3	28472.8	20214.7	26780.3	42364.1	32957.5	28256.5	33244.5	40659
0.78_217.0825m/z	217.083	0.775883	neg	5-L-Glutamyl-L-alanine	58376	Organic acids and derivatives	Carboxylic acids and derivatives	Amino acids, peptides, and analogues	**	C03740	46.7	38.5	M-H	C8H14N2O5	-2.11935	1.04387	0.0343216	0.2038	-1.22564	0.427607	9607.76	22468.7	11490	10812	6906.4	7207.83	14154.2	7075.99	16302.4	25572.4	11535.5	9468.05	42356.9	29576.8
8.48_535.2999m/z	535.3	8.4776	neg	Histidinyl-Isoleucine	HMDB0028888	Organic acids and derivatives	Carboxylic acids and derivatives	Amino acids, peptides, and analogues			38.4	0	2M-H	C12H20N4O3	0.156065	1.04377	0.00325009	0.0593487	2.59784	6.05378	11939.8	1972.29	9825.64	12511.8	12794.1	1272.44	17253.6	17981.2	1076.53	4680.99	2864.49	3136.74	8.27107	66.7045
4.64_481.1640m/z	481.164	4.6426	pos	Gö 6983	45529	Unclassified	Unclassified	Unclassified			38.1	0	M+K	C26H26N4O3	0.790295	1.03954	0.000777799	0.0290168	2.97207	7.84664	10730.4	1367.51	10732.2	9322.25	15992.9	8363.12	15157.1	4814.64	695.167	6034.14	127.909	62.4376	461.209	824.206
7.05_345.2281m/z	345.228	7.05403	neg	2-methyl-hexadecanedioic acid	LMFA01170023	Lipids and lipid-like molecules	Fatty Acyls	Fatty Acids and Conjugates			42.7	22.6	M+FA-H	C17H32O4	-0.645426	1.03833	0.0355633	0.207526	-0.770298	0.586296	19078.1	32540.1	17170.3	24269.3	10516	13802.9	35001.4	13708.9	20427.3	28603	36701.2	23433.3	39491.8	46583.9
10.39_544.2662m/z	544.266	10.3863	neg	PE(0:0/20:5(5Z,8Z,11Z,14Z,17Z))	LMGP02050053	Lipids and lipid-like molecules	Glycerophospholipids	Glycerophosphoethanolamines			37.9	1.44	M+FA-H	C25H42NO7P	-3.8507	1.03658	0.0382597	0.215423	-0.825423	0.564317	16871.9	29897.9	13864.9	14849.7	18040.7	14011.1	24222.3	16242.5	27446.1	46401.2	11757.4	19653	38151.4	35978.1
9.94_551.3035m/z	551.303	9.94002	pos	Protoporphyrinogen IX	HMDB0001097	Organoheterocyclic compounds	Tetrapyrroles and derivatives	Porphyrins	**	C01079	44.5	34.8	M+H-H2O	C34H40N4O4	3.13807	1.03579	0.0466817	0.235606	9.33973	647.945	12177.7	18.7943	3010	14696.9	5085.72	2879.41	37284.3	10109.8	3.86958e-05	1.40572	3.86958e-05	111.097	0.262593	3.86958e-05
13.32_551.4679m/z	551.468	13.3192	neg	DG(15:0/16:1(9Z)/0:0)	HMDB0007070	Lipids and lipid-like molecules	Glycerolipids	Diradylglycerols	*		37	0	M-H	C34H64O5	-0.421128	1.03504	0.00771517	0.0956164	-1.09258	0.468921	9030.66	19258.4	13476.7	4416.32	8736.67	14654	7580.09	5320.26	11525.8	26075.6	13642.2	16198.7	25168.1	22939.9
4.73_505.2055m/z	505.205	4.7291	neg	Isolimonic acid	HMDB0038170	Organoheterocyclic compounds	Naphthofurans	Unclassified			44.8	36.9	M-H	C26H34O10	-4.83614	1.03437	0.0294834	0.189005	2.50599	5.68039	15703.4	2764.5	40520.9	12033.9	10641.3	13015.6	9250.5	8758.24	6774.87	241.583	3153.64	3486.08	642.806	2288
7.35_373.2593m/z	373.259	7.35273	neg	Avocadene 4-acetate	HMDB0031045	Lipids and lipid-like molecules	Fatty Acyls	Fatty alcohols	*		40.5	16.8	M+FA-H	C19H36O4	-0.675223	1.03417	6.20596e-06	0.00288991	-0.908797	0.532629	9303.09	17466.4	11329.1	8522.94	6944.81	9141.52	11342.8	8537.42	14956.6	19296	18736.8	17842.7	16755.2	17210.9
12.16_541.2068m/z	541.207	12.1601	pos	N-Ac-Tyr-Val-Ala-Asp-CMK	64729	Unclassified	Unclassified	Unclassified			36.7	0	M+H	C24H33ClN4O8	1.61704	1.03411	0.0160221	0.138641	-1.64511	0.319723	5190.33	16233.9	8074.58	1803.8	6081.46	5956.62	8404.76	820.762	11234.6	24539.8	8524.94	10851.7	29966.1	12286
9.92_454.2560m/z	454.256	9.9182	pos	PC(6:0/6:0)[S]	39964	Unclassified	Unclassified	Unclassified			41	9.43	M+H	C20H40NO8P	-1.00672	1.03277	0.0483356	0.238979	-1.29626	0.407181	9058.4	22246.6	11789.3	9569.88	12771.1	5602.25	10338.3	4279.53	19062.2	19662.1	6718.13	12209.1	45815.6	30012.4
7.53_325.2018m/z	325.202	7.52725	neg	12S-HHT	HMDB0012535	Lipids and lipid-like molecules	Fatty Acyls	Fatty acids and conjugates	*	C20388	45.8	36.8	M+FA-H	C17H28O3	-1.05007	1.03238	0.00342194	0.0609839	-0.999875	0.500043	9707.44	19413.2	10646.8	8069.04	9497.39	10028.7	11599.2	8403.47	15943.2	22026.1	29969.4	20031	13344.4	15165.1
1.87_247.1289m/z	247.129	1.86705	pos	gamma-Glutamylvaline	HMDB0011172	Organic acids and derivatives	Carboxylic acids and derivatives	Amino acids, peptides, and analogues			47.3	38.2	M+H	C10H18N2O5	0.231566	1.0315	0.000729303	0.0281202	0.863786	1.81981	20460.9	11243.4	18071.5	21618.5	23283.4	20905	17589.1	21297.7	10195.3	17929.5	9754.21	11906.5	12489.2	5185.83
12.05_463.2810m/z	463.281	12.0505	pos	2-Acetoxy-3-geranylgeranyl-1,4-dihydroxybenzene	HMDB0040748	Lipids and lipid-like molecules	Prenol lipids	Diterpenoids	*		40.7	12.7	M+Na	C28H40O4	-1.95787	1.02809	0.00972086	0.107588	-0.907396	0.533147	11976.5	22463.8	8664.93	11549.2	19677.7	11601.9	9840.85	10524.3	28399.6	12625	31176.9	18733	18364.3	25483.7
1.15_267.0965n	312.095	1.15375	neg	Vidarabine	HMDB0014340	Nucleosides, nucleotides, and analogues	Purine nucleosides	Unclassified		C07195	43.5	20.4	M-H, M+FA-H	C10H13N5O4	-0.951945	1.02714	0.0473923	0.236924	-1.1748	0.442944	10469.1	23635.3	9789.94	14784.1	11870.7	7388.54	8144.83	10836.6	16436	38981.1	8134.33	10640	40088.6	27531.9
0.89_215.0168m/z	215.017	0.8866	neg	Sodium glucuronate	69532	Unclassified	Unclassified	Unclassified			39	0	M-H	C6H9NaO7	-2.32105	1.02634	0.0193429	0.153389	0.934777	1.91159	25421.5	13298.6	25469.5	20208.3	37103.1	25158.1	16846.7	27743.4	13217	6097.45	21195.8	24967.8	6570.14	7743.27
6.86_395.2402m/z	395.24	6.8552	pos	8,8a-Deoxyoleandolide	LMPK04000030	Lipids and lipid-like molecules	Polyketides	Macrolides and lactone polyketides	**	C11989	50.1	54.6	M+Na	C20H36O6	-0.66886	1.02578	0.010102	0.10907	-0.951672	0.517033	11306.6	21868.2	16018.9	13917.7	6975.66	10569	11143.2	9215.08	16150.2	28931.6	31097.6	23059.9	20637.4	11332.7
6.72_327.1270m/z	327.127	6.72088	neg	2-hydroxymethylolanzapine	HMDB0060987	Benzenoids	Benzene and substituted derivatives	Benzenesulfonamides			39.9	13.4	M-H	C17H20N4OS	-4.45844	1.02561	0.00125108	0.0363729	4.78295	27.5302	9056.52	328.966	8025.02	13323.7	1520.7	9944.56	14827.8	6697.36	408.83	242.173	420.208	84.1025	354.473	464.01
6.79_400.2690m/z	400.269	6.78685	pos	(5Z)-13-carboxytridec-5-enoylcarnitine	LMFA07070018	Lipids and lipid-like molecules	Fatty Acyls	Fatty esters			40.7	8.46	M+H	C21H37NO6	-0.874598	1.02521	0.000280799	0.0179048	1.2558	2.388	14143.8	5922.88	12241.1	19418.2	10294.4	13055.7	15394.9	14458.8	8045.85	3516.71	3945.1	7689.07	7092.53	5248.04
8.54_390.2768n	435.275	8.54405	neg	7-oxolithocholic acid	LMST04010150	Lipids and lipid-like molecules	Steroids and steroid derivatives	Bile acids, alcohols and derivatives	*		38.4	0	M-H, M+FA-H	C24H38O4	-0.584764	1.02379	0.00724121	0.0924771	-1.0976	0.467295	9022.12	19307.1	6430.88	5357.34	5457.61	17561.6	12207.8	7117.49	16094.5	26151.6	23576.6	21432	10334.5	18253.7
4.86_435.2599m/z	435.26	4.86215	neg	(S)-3-Mercaptohexyl pentanoate	93556	Lipids and lipid-like molecules	Fatty Acyls	Fatty acid esters	*		38.3	0	2M-H	C11H22O2S	-2.09965	1.02105	0.0135842	0.126997	-0.786959	0.579565	15083.1	26024.9	18360.9	14594	11737.7	14828.4	16367.9	14609.7	20781.7	20687	18534.6	21991.4	38672.7	35481.7
4.25_281.1863m/z	281.186	4.24663	pos	Tetracaine N-oxide	2808	Unclassified	Unclassified	Unclassified			40.3	8.65	M+H	C15H24N2O3	1.22292	1.01883	1.19472e-05	0.00369865	1.84874	3.60185	11195.5	3108.26	11881.6	9737.26	9472.06	11104	11877	13101	5429.53	1774.86	4691.63	4728.9	1048.61	976.021
5.48_552.2361m/z	552.236	5.48262	neg	Quinagolide glucuronide	2212	Unclassified	Unclassified	Unclassified			36.7	0	M-H2O-H	C26H41N3O9S	-4.20157	1.01644	0.000539043	0.0243353	1.41183	2.66075	13545	5090.68	5947.21	15818.3	14156.2	13447.4	15357.6	16543.5	7493.32	3746.39	4195.59	6049.21	4955.61	4103.96
6.63_511.3274m/z	511.327	6.63468	neg	3alpha,7alpha,12alpha,22-Tetrahydroxy-5beta-cholestan-26-oic acid	LMST04030043	Unclassified	Unclassified	Unclassified			45.5	37.1	M+FA-H	C27H46O6	-0.613692	1.01629	0.0336834	0.201619	-1.24165	0.422888	8566.57	20257.3	6499.46	7115.22	10089.7	9913.05	10361.6	7420.42	12078.6	32419.2	37094.7	16064.5	9889.05	13997.9
4.53_379.1763m/z	379.176	4.53007	neg	3,4,5-trihydroxy-6-{[(2Z)-2-(phenylmethylidene)heptyl]oxy}oxane-2-carboxylic acid	HMDB0126521	Lipids and lipid-like molecules	Fatty Acyls	Fatty acyl glycosides	*		47.2	37.6	M-H	C20H28O7	0.0939127	1.01599	0.00168076	0.0420455	1.49776	2.82404	15233	5394.06	18288.8	11401.1	24091.8	13347.8	10827.5	13441.2	5884.74	2202.99	9243.82	5684.15	6332.36	3016.28
9.96_580.3267m/z	580.327	9.96275	pos	(25R)-1beta,3alpha,7alpha-trihydroxy-5beta-cholestan-27-oyl taurine	LMST05040006	Unclassified	Unclassified	Unclassified			37.5	0	M+Na	C29H51NO7S	-1.98346	1.01559	0.00192344	0.0449135	1.94539	3.85143	12062.2	3131.87	4050.37	15572.4	11034.6	15387.2	13844.3	12484	3284.11	1338.21	7732.88	5647.14	337.172	451.682
5.82_446.3112m/z	446.311	5.81973	pos	1(3)-glyceryl-PGF2alpha	LMFA03010181	Lipids and lipid-like molecules	Fatty Acyls	Eicosanoids			44.8	29.8	M+NH4	C23H40O7	-0.106343	1.01554	0.0134134	0.126469	-0.972994	0.509448	10717.4	21037.3	18496	5877.52	7749.78	14306.5	6618.18	11256.3	29892.4	10178.3	17979.8	21713.9	26167.3	20291.8
1.18_311.1214m/z	311.121	1.17598	pos	DMABA-d10 NHS ester	96493	Unclassified	Unclassified	Unclassified			38.9	0	M+K	C13H4D10N2O4	0.461008	1.01378	0.0016037	0.0411917	3.67897	12.808	9175	716.35	6834.07	16769.5	3664.77	6876.53	13133.4	7771.72	920.987	520.629	915.918	1177.42	460.2	302.95
10.06_639.4475m/z	639.448	10.0573	neg	15-deoxy-δ-12,14-PGJ2-d4	36224	Unclassified	Unclassified	Unclassified			37.9	0	2M-H	C20H24D4O3	-4.81125	1.01258	0.0200693	0.156097	0.817113	1.76188	25827.8	14659.3	18675.4	25558.5	27372.3	32527.6	20973.6	29859.6	21657.8	5820.09	16655.1	26231.1	11840.2	5751.37
11.00_328.2491m/z	328.249	10.9995	neg	Undecanoylcarnitine	LMFA07070110	Lipids and lipid-like molecules	Fatty Acyls	Fatty acid esters	*		39	1.53	M-H	C18H35NO4	-0.744895	1.00821	0.00914017	0.104235	-1.21814	0.429835	7785.55	18112.9	4137.72	7355.29	8011.64	10502.9	10261.7	6443.99	18373.7	18224.2	8025.48	14485.8	30920.1	18648
0.68_303.1549m/z	303.155	0.6779	pos	Glutamyl-Arginine	85727	Organic acids and derivatives	Carboxylic acids and derivatives	Amino acids, peptides, and analogues			38.1	0	M+H	C11H20N5O5-	3.97109	1.00661	0.00274258	0.0545361	1.58759	3.00547	13783.4	4586.1	17866.6	11475.1	5333.48	12549.4	21584.3	13891.4	5681.41	3069.75	4395.18	4301.32	3796.24	6272.72
0.78_202.1319n	203.139	0.775233	pos	Isoleucyl-Alanine	85806	Organic acids and derivatives	Carboxylic acids and derivatives	Amino acids, peptides, and analogues			42.5	20	M+H, M+Na, M+H-H2O	C9H18N2O3	0.78733	1.00349	0.0394394	0.218246	-0.372684	0.772344	39722.9	51431.6	58007.7	38149.5	35528.5	32218.9	42629	31803.6	50498.6	40877.1	57925.7	45749.8	54752	58786.2
11.27_432.3235n	431.316	11.275	neg	4-cholesten-7α,12α,24-triol-3-one	HMDB0062399	Lipids and lipid-like molecules	Steroids and steroid derivatives	Bile acids, alcohols and derivatives	*		47.4	48	M-H, M+FA-H	C27H44O4	-1.12714	1.00348	2.34836e-05	0.00516073	-0.639418	0.641972	14251.1	22198.9	14667.5	15202.3	13386.5	14502.9	14975.9	12771.4	23174.6	25078.6	19318.5	21947.1	24312.2	19362.3
5.46_350.1840n	351.191	5.46038	pos	Boc-Phe(NMe)-Gly-OMe	65476	Unclassified	Unclassified	Unclassified			42.1	16.2	M+H, M+Na	C18H26N2O5	-0.383878	1.00345	0.0443424	0.229904	-0.693812	0.618218	20150.5	32594.5	16332.2	27191.7	18968.1	19018	23593.8	15799.3	22596.5	41531.4	54019.5	27488.5	24717.4	25214.1
8.22_741.5148m/z	741.515	8.21508	pos	PC(18:4(6Z,9Z,12Z,15Z)/14:1(9Z))	59676	Lipids and lipid-like molecules	Glycerophospholipids	Glycerophosphocholines	**	C00157	38.1	0	M+NH4	C40H70NO8P	-4.01325	1.00286	4.20842e-05	0.00708676	2.22195	4.66523	10206.5	2187.77	9151.14	10685.6	12456.7	11556	6990.94	10398.3	5401.43	961.939	3519.04	2829.42	414.81	3.86958e-05
10.26_294.2425m/z	294.242	10.2554	pos	19-Nor-5-androstenediol	HMDB0004590	Lipids and lipid-like molecules	Steroids and steroid derivatives	Estrane steroids			52.1	65.4	M+NH4	C18H28O2	-0.975405	1.0024	0.0166707	0.141704	-0.411812	0.751679	32257.3	42913.7	25663.9	30241.4	36083.2	27995.5	39171.4	34388.4	39799	39995.9	52396.9	33144.2	40716.8	51429.3
10.71_648.3153m/z	648.315	10.7082	neg	PKOOA-PS	LMGP20040006	Lipids and lipid-like molecules	Glycerophospholipids	Oxidized glycerophospholipids			38.4	0	M-H	C30H52NO12P	-0.180961	1.00128	0.00231314	0.0495874	1.87398	3.66542	12786.2	3488.34	10108.9	10166.7	10716.7	19311.4	14092.5	12321.2	1171.89	2408.89	10957.4	6391.84	3.86958e-05	3.86958e-05
6.58_379.1762m/z	379.176	6.58168	neg	3-[2-(3,7-dimethylocta-2,6-dien-1-yl)-3,4,6-trihydroxyphenyl]propanoic acid	HMDB0134970	Lipids and lipid-like molecules	Prenol lipids	Quinone and hydroquinone lipids	*		48.7	47.7	M+FA-H	C19H26O5	-0.12666	1.00045	0.000532409	0.0241986	1.62415	3.08261	12585	4082.58	19777.7	13664.1	10031.3	9047.68	12506.7	10482.8	5448.19	3526.23	4271.49	5841.76	3434.73	1973.09
